# Supplementary material
Source: Research Square preprint supplement (doi:10.21203/rs.3.rs-8857692/v1)
Supplement: Supplementary file 1 [file c2c5cf14c995910ef8f6af5f.xlsx]

## Sheet: Full text retrieval n=17
Title	Authors	DOI	Publication Year	full text
Response to Intravenous NAC in Critically Ill COVID-19 Patients	Gamarra-Morales Y et al.	10.3390/nu15092235	2023	yes
NAC inhalation spray in COVID-19: randomized trial	Panahi Y et al.	10.1002/jmv.28393	2023	yes
Dendrimer nanotherapy for severe COVID-19	Gusdon AM et al.	10.1126/scitranslmed.abo2652	2022	yes
Double-blind RCT: NAC for severe COVID-19	de Alencar JCG et al.	10.1093/cid/ciaa1443	2021	yes
NAC inhalation on ventilator-associated pneumonia	Qu D et al.	10.3760/cma.j.issn.0578-1310.2016.04.010	2016	artcle n chnese
Combined nebulization (heparin + NAC + steroids) in COVID-19	Gong J et al.	10.1186/s12890-025-03824-5	2025	yes
Pentoxifylline in hospitalized COVID-19 patients	Azizi H et al.	10.1016/j.intimp.2021.108227	2021	yes
Antioxidant reserve of lungs: high dose selenium in critically ill	Mahmoodpoor A et al.	10.1016/j.jcrc.2017.12.016	2018	no
Antioxidant Therapy in Septic Shock (SOFA reduction)	Aisa-Álvarez A et al.	10.3390/cells12091330	2023	yes
Antioxidants as adjuvant therapy in septic shock	Pérez-Torres I et al.	10.3390/ijms242316610	2023	yes
Selenium supplementation in critically ill / sepsis	Brodska H et al.	10.1016/j.jtemb.2015.02.005	2015	no
Sodium selenite infusion in septic shock (secondary analysis)	Forceville X et al.	10.1016/j.jtemb.2022.127031	2022	yes
High-dose selenium substitution in sepsis	Valenta J et al.	10.1007/s00134-011-2153-0	2011	no
NAC infusion dose on redox status in sepsis ICU	Peivandi Yazdi A et al.	10.1177/0885066618823152	2020	yes
Higher dose NAC following mechanical ventilation	Najafi A et al.	10.1186/2008-2231-22-57	2014	yes
Enteral glutamine in SIRS due to pulmonary infection	Cavalcante AA et al.	10.1016/j.nut.2011.07.011	2012	yes
Improvement of health status of sepsis patients undergoing blood purification therapy by using combination of acetylcysteine and frail management	Wu J et al.	10.36721/PJPS.2025.38.4.REG.13502.1	2025	no
Use of N-Acetylcysteine at high doses as an oral treatment for patients hospitalized with COVID-19	Izquierdo JL et al.	10.1177/00368504221074574	2022	yes
Ferroptosis, pyroptosis and necroptosis in acute respiratory distress syndrome	Zheng, YX; Huang, YB; Xu, YH; Sang, L; Liu, XQ; Li, YM	10.1038/s41420-023-01369-2	2023	yes
N-acetylcysteine for adults with acute respiratory distress syndrome: A meta-analysis …	Lu, X; Ma, Y; …	10.1177/1024907918794559	2019	yes
A pilot study on intravenous N-Acetylcysteine treatment in patients with mild-to-moderate COVID19-associated ARDS	Taher A, Lashgari M, …	10.1007/s43440-021-00296-2	2021	yes
Effect of N-acetylcysteine on pulmonary function in patients undergoing off-pump coronary artery bypass surgery	Kim JC, Hong SW, …	10.1111/j.1399-6576.2011.02407.x	2011	no
A metabolomic analysis of thiol response for standard and modified N-acetyl cysteine treatment regimens …	Dear JW, Ng ML, …	10.1111/cts.13009	2021	yes
Systemic inflammation and oxidative stress post-lung resection: Effect of pretreatment with N-acetylcysteine	Bastin AJ, Davies N, …	10.1111/resp.12662	2016	no

## Sheet: WoS PUBMED
Publication Type	Authors	Book Authors	Book Editors	Book Group Authors	Author Full Names	Book Author Full Names	Group Authors	Article Title	Source Title	Book Series Title	Book Series Subtitle	Language	Document Type	Conference Title	Conference Date	Conference Location	Conference Sponsor	Conference Host	Author Keywords	Keywords Plus	Abstract	Addresses	Affiliations	Reprint Addresses	Email Addresses	Researcher Ids	ORCIDs	Funding Orgs	Funding Name Preferred	Funding Text	Cited References	Cited Reference Count	Times Cited, WoS Core	Times Cited, All Databases	180 Day Usage Count	Since 2013 Usage Count	Publisher	Publisher City	Publisher Address	ISSN	eISSN	ISBN	Journal Abbreviation	Journal ISO Abbreviation	Publication Date	Publication Year	Volume	Issue	Part Number
J	Koc, K; Ozek, NS; Aysin, F; Demir, O; Yilmaz, A; Yilmaz, M; Geyikoglu, F; Erol, HS				Koc, Kubra; Ozek, Nihal Simsek; Aysin, Ferhunde; Demir, Ozlem; Yilmaz, Asli; Yilmaz, Mehmet; Geyikoglu, Fatime; Erol, Huseyin Serkan			Hispidulin exerts a protective effect against oleic acid induced-ARDS in the rat via inhibition of ACE activity and MAPK pathway	INTERNATIONAL JOURNAL OF ENVIRONMENTAL HEALTH RESEARCH			English	Article						Hispidulin; lung injury with ARDS; ACE activity	RESPIRATORY-DISTRESS-SYNDROME; ACUTE LUNG INJURY; OXIDATIVE STRESS; FATTY-ACIDS; PATHOGENESIS; MICE; APOPTOSIS	This study investigates the protective role of Hispidulin on acute respiratory distress syndrome (ARDS) in rats. Rats were divided into three groups: control, ARDS, ARDS+ Hispidulin. The ARDS models were established by injecting rats with oleic acid. Hispidulin (100 mg/kg) was injected i.p. an hour before ARDS. Myeloperoxidase (MPO), Interleukin-8 (IL-8), Mitogen-activated protein kinases (MAPK),…	[Koc, Kubra; Ozek, Nihal Simsek; Aysin, Ferhunde; Geyikoglu, Fatime] Ataturk Univ, Fac Sci, Dept Biol, Erzurum, Turkiye; [Ozek, Nihal Simsek; Aysin, Ferhunde] Ataturk Univ, East Anatolian High Technol Res & Applicat Ctr DAY, Erzurum, Turkiye; [Demir, Ozlem] Erzincan Binali Yildirim Univ, Fac Med, Dept Histol & Embryol, Erzincan, Turkiye; [Yilmaz, Asli] Ataturk Univ, Fac Sci, Dept Mol Biol & Genet…	Ataturk University; Ataturk University; Erzincan Binali Yildirim University; Ataturk University; Ataturk University; Kastamonu University	Koc, K (corresponding author), Ataturk Univ, Fac Sci, Dept Biol, Erzurum, Turkiye.	kubrakc@hotmail.com	Erol, Huseyin/B-5793-2016; yilmaz, mehmet/P-8290-2015; aysin, ferhunde/ABE-1447-2020; YILMAZ, ASLI/F-2572-2019; Erol, Huseyin Serkan/B-5793-2016; Ozek, Nihal/AAF-7092-2019; Koc, Kubra/ABP-3109-2022	yilmaz, mehmet/0000-0003-2687-9167; OZDILEK YILMAZ, ASLI/0000-0001-7874-5641; aysin, ferhunde/0000-0003-1971-8031; /0000-0001-6208-165X; Erol, Huseyin Serkan/0000-0002-9121-536X;	BAP from Ataturk University; [FKP-2021-8719]	BAP from Ataturk University;	This work was supported by the BAP from Ataturk University (grant number FKP-2021-8719)		47	3	4	0	20	TAYLOR & FRANCIS LTD	ABINGDON	2-4 PARK SQUARE, MILTON PARK, ABINGDON OR14 4RN, OXON, ENGLAND	0960-3123	1369-1619		INT J ENVIRON HEAL R	Int. J. Environ. Health Res.	FEB 1	2024	34	2
J	Simou, E; Leonardi-Bee, J; Britton, J				Simou, Evangelia; Leonardi-Bee, Jo; Britton, John			The Effect of Alcohol Consumption on the Risk of ARDS A Systematic Review and Meta-Analysis	CHEST			English	Article						alcohol consumption; ARDS; meta-analysis; systematic review	RESPIRATORY-DISTRESS-SYNDROME; ACUTE LUNG INJURY; CIGARETTE-SMOKING; BARRIER FUNCTION; DYSFUNCTION; ABUSE; GLUTATHIONE; INGESTION; MORTALITY; SEVERITY	BACKGROUND: To conduct a systematic review and meta-analysis evaluating the association between alcohol consumption and the risk of ARDS in adults. METHODS: Medline, EMBASE and Web of Science were searched to identify observational studies evaluating the association between prior alcohol intake and the occurrence of ARDS among adults, published between 1985 and 2015 and with no language restricti…	[Simou, Evangelia; Leonardi-Bee, Jo; Britton, John] Univ Nottingham, Div Epidemiol & Publ Hlth, UK Ctr Tobacco & Alcohol Studies, Nottingham, England	University of Nottingham	Simou, E (corresponding author), Univ Nottingham, City Hosp, UK Ctr Tobacco & Alcohol Studies, Div Epidemiol & Publ Hlth, Clin Sci Bldg, Nottingham NG5 1PB, England.	evangelia.simou@nottingham.ac.uk		Britton, John/0000-0001-6375-3841; Simou, Evangelia/0000-0001-5220-4089	Medical Research Council [MR/K023195/1]; UK Centre for Tobacco and Alcohol Studies; British Heart Foundation; Cancer Research UK; Economic and Social Research Council; National Institute of Health Research under UK Clinical Research Collaboration; Medical Research Council [MR/K023195/1] Funding Source: researchfish	Medical Research Council(UK Research & Innovation (UKRI)Medical Research Council UK (MRC)); UK Centre for Tobacco and Alcohol Studies; British Heart Foundation(British Heart Foundation); Cancer Research UK(Cancer Research UK); Economic and Social Research Council(UK Research & Innovation (UKRI)Economic & Social Research Council (ESRC)); National Institute of Health Research under UK Clinical Rese…	This work was supported by the Medical Research Council [Grant No. MR/K023195/1]; the UK Centre for Tobacco and Alcohol Studies (http://www.ukctas.net); and the British Heart Foundation, Cancer Research UK, the Economic and Social Research Council, and the National Institute of Health Research, under the auspices of the UK Clinical Research Collaboration, is gratefully acknowledged.		46	73	84	1	8	ELSEVIER	AMSTERDAM	RADARWEG 29, 1043 NX AMSTERDAM, NETHERLANDS	0012-3692	1931-3543		CHEST	Chest	JUL	2018	154	1
J	Rahbardar, MG; Razavi, BM; Naraki, K; Hosseinzadeh, H				Rahbardar, Mahboobeh Ghasemzadeh; Razavi, Bibi Marjan; Naraki, Karim; Hosseinzadeh, Hossein			Therapeutic effects of minocycline on oleic acid-induced acute respiratory distress syndrome (ARDS) in rats	NAUNYN-SCHMIEDEBERGS ARCHIVES OF PHARMACOLOGY			English	Article						Respiratory system; Antioxidants; Anti-inflammatory agents; Apoptosis; Anti-bacterial agents; Cytokines	ACUTE LUNG INJURY; OXIDATIVE STRESS; ANIMAL-MODELS; INFLAMMATION; ACTIVATION; APOPTOSIS; MEDIATORS; PROTECTS	Acute respiratory distress syndrome (ARDS) is a serious intensive care condition. Despite advances in treatment over the previous few decades, ARDS patients still have high fatality rates. Thus, more research is needed to improve the outcomes for people with ARDS. Minocycline is an antibiotic with antioxidant, anti-inflammatory, and anti-apoptotic effects. In the current investigation, the therap…	[Rahbardar, Mahboobeh Ghasemzadeh; Hosseinzadeh, Hossein] Mashhad Univ Med Sci, Pharmaceut Technol Inst, Pharmaceut Res Ctr, Mashhad, Iran; [Razavi, Bibi Marjan; Naraki, Karim; Hosseinzadeh, Hossein] Mashhad Univ Med Sci, Sch Pharm, Dept Pharmacodynam & Toxicol, Mashhad, Iran; [Razavi, Bibi Marjan] Mashhad Univ Med Sci, Pharmaceut Technol Inst, Targeted Drug Delivery Res Ctr, Mashhad, Iran	Mashhad University of Medical Sciences; Mashhad University of Medical Sciences; Mashhad University of Medical Sciences	Hosseinzadeh, H (corresponding author), Mashhad Univ Med Sci, Pharmaceut Technol Inst, Pharmaceut Res Ctr, Mashhad, Iran.;Razavi, BM; Hosseinzadeh, H (corresponding author), Mashhad Univ Med Sci, Sch Pharm, Dept Pharmacodynam & Toxicol, Mashhad, Iran.;Razavi, BM (corresponding author), Mashhad Univ Med Sci, Pharmaceut Technol Inst, Targeted Drug Delivery Res Ctr, Mashhad, Iran.	razavimr@mums.ac.ir; hosseinzadehh@mums.ac.ir	; Hosseinzadeh, Hossein/F-3013-2010; Ghasemzadeh Rahbardar, Mahboobeh/V-4452-2019; Razavi, Bibi/AAY-5636-2020	naraki, karim/0000-0001-7767-2516; Ghasemzadeh Rahbardar, Mahboobeh/0000-0002-5491-572X;	Vice-Chancellor of Research, Mashhad University of Medical Sciences [990628]	Vice-Chancellor of Research, Mashhad University of Medical Sciences(Isfahan University of Medical Sciences)	This research was supported by the Vice-Chancellor of Research, Mashhad University of Medical Sciences (No: 990628).		31	8	9	0	3	SPRINGER	NEW YORK	ONE NEW YORK PLAZA, SUITE 4600, NEW YORK, NY, UNITED STATES	0028-1298	1432-1912		N-S ARCH PHARMACOL	Naunyn-Schmiedebergs Arch. Pharmacol.	NOV	2023	396	11
J	Notz, Q; Herrmann, J; Schlesinger, T; Helmer, P; Sudowe, S; Sun, Q; Hackler, J; Roeder, D; Lotz, C; Meybohm, P; Kranke, P; Schomburg, L; Stoppe, C				Notz, Quirin; Herrmann, Johannes; Schlesinger, Tobias; Helmer, Philipp; Sudowe, Stephan; Sun, Qian; Hackler, Julian; Roeder, Daniel; Lotz, Christopher; Meybohm, Patrick; Kranke, Peter; Schomburg, Lutz; Stoppe, Christian			Clinical Significance of Micronutrient Supplementation in Critically Ill COVID-19 Patients with Severe ARDS	NUTRIENTS			English	Article						acute respiratory distress syndrome; selen; zinc; critical care; oxidative stress; nutrient supplementation	RESPIRATORY-DISTRESS-SYNDROME; COLORECTAL-CANCER RISK; SELENOPROTEIN EXPRESSION; SYSTEMIC INFLAMMATION; RESPONSE SYNDROME; OXIDATIVE STRESS; SELENIUM; ZINC; DEFICIENCY; SEPSIS	The interplay between inflammation and oxidative stress is a vicious circle, potentially resulting in organ damage. Essential micronutrients such as selenium (Se) and zinc (Zn) support anti-oxidative defense systems and are commonly depleted in severe disease. This single-center retrospective study investigated micronutrient levels under Se and Zn supplementation in critically ill patients with C…	[Notz, Quirin; Herrmann, Johannes; Schlesinger, Tobias; Helmer, Philipp; Roeder, Daniel; Lotz, Christopher; Meybohm, Patrick; Kranke, Peter; Stoppe, Christian] Univ Hosp Wuerzburg, Dept Anesthesiol Intens Care Emergency & Pain Med, D-97080 Wurzburg, Germany; [Sudowe, Stephan] Ganzimmun Diagnost AG, D-55128 Mainz, Germany; [Sun, Qian; Hackler, Julian; Schomburg, Lutz] Charite Univ Med Berlin, Inst…	University of Wurzburg; Free University of Berlin; Humboldt University of Berlin; Charite Universitatsmedizin Berlin	Notz, Q (corresponding author), Univ Hosp Wuerzburg, Dept Anesthesiol Intens Care Emergency & Pain Med, D-97080 Wurzburg, Germany.	Notz_q@ukw.de; Herrmann_J4@ukw.de; schlesinge_t@ukw.de; helmer_p@ukw.de; dr.sudowe@ganzimmun.de; qian.sun@charite.de; julian.hackler@charite.de; Roeder_d@ukw.de; Lotz_C@ukw.de; Meybohm_P@ukw.de; Kranke_P@ukw.de; lutz.schomburg@charite.de; christian.stoppe@gmail.com	; Meybohm, Patrick/K-4066-2017; Meybohm, Patrick/KEE-5745-2024; Schomburg, Lutz/D-8096-2013	Herrmann, Johannes/0000-0002-2169-3761; Meybohm, Patrick/0000-0002-2666-8696; Lotz, Christopher/0000-0003-2574-624X; Stoppe, Christian/0000-0002-2028-2039; Sun, Qian/0000-0002-4458-6555; Schlesinger, Tobias/0000-0003-1044-3086; Notz, Quirin/0000-0002-4042-4436; Helmer, Philipp/0000-0001-7004-7400; Schomburg, Lutz/0000-0001-9445-1555	Open Access Publication Fund of the University of Wuerzburg; Deutsche Forschungsgemeinschaft (DFG), Research Unit FOR-2558 TraceAge [Scho 849/6-2]; Deutsche Forschungsgemeinschaft (DFG), CRC/TR 296 (Loco-Tact) [P17]	Open Access Publication Fund of the University of Wuerzburg; Deutsche Forschungsgemeinschaft (DFG), Research Unit FOR-2558 TraceAge(German Research Foundation (DFG)); Deutsche Forschungsgemeinschaft (DFG), CRC/TR 296 (Loco-Tact)(German Research Foundation (DFG))	This publication was supported by the Open Access Publication Fund of the University of Wuerzburg. Trace element research in the laboratory of Lutz Schomburg is supported by the Deutsche Forschungsgemeinschaft (DFG), Research Unit FOR-2558 TraceAge (Scho 849/6-2), and CRC/TR 296 (Loco-Tact, P17).		64	36	41	0	8	MDPI	BASEL	MDPI AG, Grosspeteranlage 5, CH-4052 BASEL, SWITZERLAND		2072-6643		NUTRIENTS	Nutrients	JUN	2021	13	6
J	McClintock, CR; Mulholland, N; Krasnodembskaya, AD				McClintock, Catherine R. R.; Mulholland, Niamh; Krasnodembskaya, Anna D. D.			Biomarkers of mitochondrial dysfunction in acute respiratory distress syndrome: A systematic review and meta-analysis	FRONTIERS IN MEDICINE			English	Review						acute respiratory distress syndrome; biomarker; mitochondrial dysfunction; mitochondrial DNA; mortality; systematic review; meta-analysis; ARDS	LIPID-PEROXIDATION; OXIDATIVE STRESS; N-ACETYLCYSTEINE; XANTHINE-OXIDASE; GLUTATHIONE; MEMBRANE; ACETONE; ACID; ARDS; DNA	Introduction: Acute respiratory distress syndrome (ARDS) is one of the main causes of Intensive Care Unit morbidity and mortality. Metabolic biomarkers of mitochondrial dysfunction are correlated with disease development and high mortality in many respiratory conditions, however it is not known if they can be used to assess risk of mortality in patients with ARDS. Objectives: The aim of this syst…	[McClintock, Catherine R. R.; Mulholland, Niamh; Krasnodembskaya, Anna D. D.] Queens Univ Belfast, Wellcome Wolfson Inst Expt Med, Sch Med Dent & Biomed Sci, Belfast, North Ireland	Queens University Belfast	McClintock, CR (corresponding author), Queens Univ Belfast, Wellcome Wolfson Inst Expt Med, Sch Med Dent & Biomed Sci, Belfast, North Ireland.	cmcclintock05@qub.ac.uk	Krasnodembskaya, Anna/I-1225-2019	Krasnodembskaya, Anna/0000-0002-2380-5069	UKRI Medical Research Council Research; Department for Economy Ph.D. studentship [MR/R025096/1, MR/S009426/1]	UKRI Medical Research Council Research; Department for Economy Ph.D. studentship	AK was supported by UKRI Medical Research Council Research (MR/R025096/1 and MR/S009426/1). CM was supported by Department for Economy Ph.D. studentship.		55	14	14	0	3	FRONTIERS MEDIA SA	LAUSANNE	AVENUE DU TRIBUNAL FEDERAL 34, LAUSANNE, CH-1015, SWITZERLAND		2296-858X		FRONT MED-LAUSANNE	Front. Med.	DEC 14	2022	9
J	Zhan, Y; Yang, CJ; Zhang, QH; Yao, L				Zhan, Yuan; Yang, Chunjian; Zhang, Qunhui; Yao, Li			Silent information regulator type-1 mediates amelioration of inflammatory response and oxidative stress in lipopolysaccharide-induced acute respiratory distress syndrome	JOURNAL OF BIOCHEMISTRY			English	Article						ARDS; inflammatory response; oxidative stress; SIRT1	NF-KAPPA-B; SIRT1 ACTIVATOR; SRT1720; MICE	Silent information regulator type-1 (SIRT1) is crucial during the development of acute respiratory distress syndrome (ARDS). We aimed to explore whether SIRT1 activation could protect against ARDS. SIRT1 was activated by its agonist SRT1720. ARDS was induced by intraperitoneal injection of 5 mg/kg lipopolysaccharide (LPS). Lung injuries were determined by the lung wet/dry ratio, inflammatory cell…	[Zhan, Yuan; Zhang, Qunhui; Yao, Li] Second Peoples Hosp Hefei, Dept Intens Care Unit, 246 Heping Rd, Hefei 230011, Anhui, Peoples R China; [Yang, Chunjian] Second Peoples Hosp Hefei, Dept Gen Surg, 246 Heping Rd, Hefei 230011, Anhui, Peoples R China		Zhan, Y (corresponding author), Second Peoples Hosp Hefei, Dept Intens Care Unit, 246 Heping Rd, Hefei 230011, Anhui, Peoples R China.	zyuan0119@126.com; uwin3776@163.com	Zhang, Qunhui/AHI-0083-2022						30	3	3	0	8	OXFORD UNIV PRESS	OXFORD	GREAT CLARENDON ST, OXFORD OX2 6DP, ENGLAND	0021-924X	1756-2651		J BIOCHEM	J. Biochem.	MAY	2021	169	5
J	Horowitz, RI; Freeman, PR				Horowitz, Richard, I; Freeman, Phyllis R.			Three novel prevention, diagnostic, and treatment options for COVID-19 urgently necessitating controlled randomized trials	MEDICAL HYPOTHESES			English	Article						COVID-19; Cytokine storm syndrome; Macrophage activation syndrome; Pneumonia; ARDS; DIC; N-Acetyl-cysteine; Glutathione; NF-kappa B; Nrf2	NF-KAPPA-B; ALPHA-LIPOIC ACID; OXIDATIVE STRESS; HEMOPHAGOCYTIC LYMPHOHISTIOCYTOSIS; VITAMIN-C; GLUTATHIONE; CYTOKINES; ZINC; IDENTIFICATION; INFLAMMATION	Purpose: Asymptomatic or minimally symptomatic infection with COVID-19 can result in silent transmission to large numbers of individuals, resulting in expansion of the pandemic with a global increase in morbidity and mortality. New ways of screening the general population for COVID-19 are urgently needed along with novel effective prevention and treatment strategies. Hypothesis: A hypothetical th…	[Horowitz, Richard, I] HHS Babesia & Tickborne Pathogen Subcomm, Washington, DC 20201 USA; [Horowitz, Richard, I; Freeman, Phyllis R.] Hudson Valley Healing Arts Ctr, 4232 Albany Post Rd, Hyde Pk, NY 12538 USA		Horowitz, RI (corresponding author), Hudson Valley Healing Arts Ctr, 4232 Albany Post Rd, Hyde Pk, NY 12538 USA.	medical@hvhac.com			MSIDS Research Foundation (MRF)	MSIDS Research Foundation (MRF)	We would like to thank the MSIDS Research Foundation (MRF) for providing a research grant for the publication of this study. Dr. Richard Horowitz is the guarantor of the contents of this manuscript.		106	46	55	0	29	ELSEVIER	AMSTERDAM	RADARWEG 29, 1043 NX AMSTERDAM, NETHERLANDS	0306-9877	1532-2777		MED HYPOTHESES	Med. Hypotheses	OCT	2020	143
J	Jaiswal, N; Bhatnagar, M; Shah, H				Jaiswal, N.; Bhatnagar, M.; Shah, H.			N-acetycysteine: A potential therapeutic agent in COVID-19 infection	MEDICAL HYPOTHESES			English	Letter						COVID-19; Glutathione; N-acetylcysteine; Oxidative stress	ACETYLCYSTEINE	COVID-19 is an overwhelming pandemic which has shattered the whole world. Lung injury being the main clinical manifestation, it is likely to cause COPD (chronic obstructive pulmonary disease) and ARDS (acute respiratory distress syndrome). The possible cause behind this might be redox imbalance due to viral infection. Elevation in Glutathione (GSH) levels by administration of its promolecule migh…	[Jaiswal, N.] MLS Univ, Anim Biotech & Mol Neurosci, Dept Zool, Udaipur, Rajasthan, India; [Bhatnagar, M.] MLS Univ, Fac Sci, Dept Zool, Udaipur, Rajasthan, India; [Shah, H.] Index Med Coll, Dept Microbiol, Indore, India	Mohanlal Sukhadia University; Mohanlal Sukhadia University	Jaiswal, N (corresponding author), 88 Padmalaya Colony,Umang Pk, Indore, India.	jaisneha411@gmail.com							8	15	16	0	4	ELSEVIER	AMSTERDAM	RADARWEG 29, 1043 NX AMSTERDAM, NETHERLANDS	0306-9877	1532-2777		MED HYPOTHESES	Med. Hypotheses	NOV	2020	144
J	Audi, SH; Taheri, P; Zhao, M; Hu, KR; Jacobs, ER; Clough, AV				Audi, Said H.; Taheri, Pardis; Zhao, Ming; Hu, Kurt; Jacobs, Elizabeth R.; V. Clough, Anne			In vivo molecular imaging stratifies rats with different susceptibilities to hyperoxic acute lung injury	AMERICAN JOURNAL OF PHYSIOLOGY-LUNG CELLULAR AND MOLECULAR PHYSIOLOGY			English	Article						acute respiratory distress syndrome (ARDS); duramycin; glutathione; hexamethylpropyleneamine oxime (HMPAO); single photon emission computed tomography (SPECT)	RESPIRATORY-DISTRESS-SYNDROME; GLUTATHIONE REDOX CYCLE; TC-99M-HEXAMETHYLPROPYLENEAMINE OXIME; ENDOTHELIAL-CELLS; OXIDATIVE STRESS; COENZYME Q(1); MITOCHONDRIAL; PROTECTION; MECHANISMS; TOLERANCE	99mTc-hexamethylpropyleneamine oxime (HMPAO) and 99mTc-duramycin in vivo imaging detects pulmonary oxidative stress and cell death, respectively, in rats exposed to >95% O2 (hyperoxia) as a model of acute respiratory distress syndrome (ARDS). Preexposure to hyperoxia for 48 h followed by 24 h in room air (H-T) is protective against hyperoxia-induced lung injury. This study's objective was to dete…	[Audi, Said H.; Taheri, Pardis] Marquette Univ, Med Coll Wisconsin, Dept Biomed Engn, Milwaukee, WI 53233 USA; [Audi, Said H.; Taheri, Pardis; Hu, Kurt; Jacobs, Elizabeth R.; V. Clough, Anne] Clement J Zablocki Vet Adm Med Ctr, Milwaukee, WI 53295 USA; [Audi, Said H.; Hu, Kurt; Jacobs, Elizabeth R.] Med Coll Wisconsin, Div Pulm & Crit Care Med, Milwaukee, WI 53226 USA; [V. Clough, Anne] Marquette…	Marquette University; Medical College of Wisconsin; Medical College of Wisconsin; Marquette University; Northwestern University	Audi, SH (corresponding author), Marquette Univ, Med Coll Wisconsin, Dept Biomed Engn, Milwaukee, WI 53233 USA.;Audi, SH (corresponding author), Clement J Zablocki Vet Adm Med Ctr, Milwaukee, WI 53295 USA.;Audi, SH (corresponding author), Med Coll Wisconsin, Div Pulm & Crit Care Med, Milwaukee, WI 53226 USA.	said.audi@marquette.edu		Hu, Kurt/0000-0002-2859-8513	National Institutes of Health (NIH); VA Merit Review Award; [2R15HL129209-02]; [5R01HL152712]; [BX001681]	National Institutes of Health (NIH)(United States Department of Health & Human ServicesNational Institutes of Health (NIH) - USA); VA Merit Review Award(US Department of Veterans Affairs); ; ;	Acknowledgments GRANTS This work was supported by National Institutes of Health (NIH) 2R15HL129209-02 (to S.H.A., A.V.C., and E.R.J.) , 5R01HL152712 (to M.Z.) , and VA Merit Review Award BX001681 (to E.R.J., S.H.A., and A.V.C.) .		65	4	4	0	8	AMER PHYSIOLOGICAL SOC	Rockville	6120 Executive Blvd, Suite 600, Rockville, MD, UNITED STATES	1040-0605	1522-1504		AM J PHYSIOL-LUNG C	Am. J. Physiol.-Lung Cell. Mol. Physiol.	OCT	2022	323	4
J	Tang, J; Yuan, JQ; Sun, JH; Yan, M; Li, MC; Liu, YF; Xu, SH; Li, J; Fu, H; Li, WW; Hu, ZX				Tang, Jia; Yuan, Jiaqin; Sun, Jinghao; Yan, Mi; Li, Mengchun; Liu, Yanfei; Xu, Shaohua; Li, Jing; Fu, Hong; Li, Wanwei; Hu, Zhangxue			Integration of multiomics analysis to reveal the major pathways of vitamin A deficiency aggravates acute respiratory distress syndrome in neonatal rats	SCIENTIFIC REPORTS			English	Article							ACUTE LUNG INJURY; ARDS	Acute respiratory distress syndrome (ARDS) is a major disease that threatens the life and health of neonates. Vitamin A (VA) can participate in early fetal lung development and affect lung immune function. Researches revealed that the serum VA level in premature infants with ARDS was lower than that in premature infants without ARDS of the same gestational age, and premature infants with VA defic…	[Tang, Jia; Sun, Jinghao; Yan, Mi; Li, Mengchun; Liu, Yanfei; Li, Jing; Li, Wanwei; Hu, Zhangxue] Army Med Univ, Daping Hosp, Dept Pediat, Chongqing 400042, Peoples R China; [Fu, Hong] Chongqing Univ, Dept Pediat, Jiangjin Hosp, Chongqing 402260, Peoples R China; [Yuan, Jiaqin] Second Peoples Hosp Yibin, Dept Orthoped, Yibin 644000, Peoples R China; [Xu, Shaohua] Wuhan Univ, Ctr Gene Diag, Dept C…	Army Medical University; Chongqing University; Wuhan University; Wuhan University	Li, WW; Hu, ZX (corresponding author), Army Med Univ, Daping Hosp, Dept Pediat, Chongqing 400042, Peoples R China.;Fu, H (corresponding author), Chongqing Univ, Dept Pediat, Jiangjin Hosp, Chongqing 402260, Peoples R China.	3249776238@qq.com; liwanwei@sina.com; huzx1@163.com	Sun, Jinghao/LDE-7969-2024; yuan, jiaqin/GLQ-9537-2022; Xu, Shaohua/AAM-1390-2020	Fu, Hong/0009-0001-1316-9652;	National Natural Science Foundation of China [2021YFC2701702]; National Key Research and Development Program [cstc2020jcyj-msxmX0457]; Natural Science Foundation of Chongqing, China [82201909, 82271751]; National Natural Science Foundation of China	National Natural Science Foundation of China(National Natural Science Foundation of China (NSFC)); National Key Research and Development Program(National Key Research & Development Program of China); Natural Science Foundation of Chongqing, China(Natural Science Foundation of Chongqing); National Natural Science Foundation of China(National Natural Science Foundation of China (NSFC))	This work was sponsored by National Key Research and Development Program (2021YFC2701702), Natural Science Foundation of Chongqing, China (cstc2020jcyj-msxmX0457) and National Natural Science Foundation of China (82201909 and 82271751).		30	2	2	1	10	NATURE PORTFOLIO	BERLIN	HEIDELBERGER PLATZ 3, BERLIN, 14197, GERMANY	2045-2322			SCI REP-UK	Sci Rep	DEC 19	2023	13	1
J	Kolomaznik, M; Mikolka, P; Hanusrichterova, J; Kosutova, P; Matasova, K ; Mokra, D; Calkovska, A				Kolomaznik, Maros; Mikolka, Pavol; Hanusrichterova, Juliana; Kosutova, Petra; Matasova, Katarina, Jr.; Mokra, Daniela; Calkovska, Andrea			N-Acetylcysteine in Mechanically Ventilated Rats with Lipopolysaccharide-Induced Acute Respiratory Distress Syndrome: The Effect of Intravenous Dose on Oxidative Damage and Inflammation	BIOMEDICINES			English	Article						ARDS; bacterial lipopolysaccharide; N-acetylcysteine; lung functions parameters; inflammation; oxidative damage	ACUTE LUNG INJURY; PULMONARY; DEXAMETHASONE; ALLEVIATION; GLUTATHIONE; DYSFUNCTION; PROTECTION; MORTALITY; THERAPY; DISEASE	Treatment of acute respiratory distress syndrome (ARDS) is challenging due to its multifactorial aetiology. The benefit of antioxidant therapy was not consistently demonstrated by previous studies. We evaluated the effect of two different doses of intravenous (i.v.) N-acetylcysteine (NAC) on oxidative stress, inflammation and lung functions in the animal model of severe LPS-induced lung injury re…	[Kolomaznik, Maros; Kosutova, Petra] Comenius Univ, Jessenius Fac Med Martin, Biomed Ctr Martin, Martin 03601, Slovakia; [Mikolka, Pavol; Hanusrichterova, Juliana; Mokra, Daniela; Calkovska, Andrea] Comenius Univ, Jessenius Fac Med Martin, Dept Physiol, Martin 03601, Slovakia; [Matasova, Katarina, Jr.] Comenius Univ, Jessenius Fac Med Martin, Clin Neonatol, Martin 03601, Slovakia; [Matasova, Kata…	Comenius University Bratislava; Comenius University Bratislava; Comenius University Bratislava	Calkovska, A (corresponding author), Comenius Univ, Jessenius Fac Med Martin, Dept Physiol, Martin 03601, Slovakia.	maros.kolomaznik@uniba.sk; pavol.mikolka@uniba.sk; topercerova4@uniba.sk; petra.kosutova@uniba.sk; daniela.mokra@uniba.sk; andrea.calkovska@uniba.sk	Mokra, Daniela/X-7430-2018; Kolomaznik, Maros/AAA-7976-2022; Košútová, Petra/X-6534-2018; Mikolka, Pavol/X-6080-2018; Calkovska, Andrea/X-6321-2018; Kosutova, Petra/X-6534-2018	Mokra, Daniela/0000-0001-5885-6360; Hanusrichterova, Juliana/0009-0009-2781-2264; Mikolka, Pavol/0000-0001-8485-4748; Kolomaznik, Maros/0000-0003-0992-3058; Kosutova, Petra/0000-0002-1596-3702					50	9	11	3	10	MDPI	BASEL	MDPI AG, Grosspeteranlage 5, CH-4052 BASEL, SWITZERLAND		2227-9059		BIOMEDICINES	Biomedicines	DEC	2021	9	12
J	Islam, D; Huang, YB; Fanelli, V; Delsedime, L; Wu, SL; Khang, JL; Han, B; Grassi, A; Li, MS; Xu, YH; Luo, A; Wu, JF; Liu, XQ; McKillop, M; Medin, J; Qiu, HB; Zhong, NS; Liu, MY; Laffey, J; Li, YM; Zhang, HB				Islam, Diana; Huang, Yongbo; Fanelli, Vito; Delsedime, Luisa; Wu, Sulong; Khang, Julie; Han, Bing; Grassi, Alice; Li, Manshu; Xu, Yonghao; Luo, Alice; Wu, Jianfeng; Liu, Xiaoqing; McKillop, Montey; Medin, Jeffery; Qiu, Haibo; Zhong, Nanshan; Liu, Mingyao; Laffey, John; Li, Yimin; Zhang, Haibo			Identification and Modulation of Microenvironment Is Crucial for Effective Mesenchymal Stromal Cell Therapy in Acute Lung Injury	AMERICAN JOURNAL OF RESPIRATORY AND CRITICAL CARE MEDICINE			English	Article						acute respiratory distress syndrome; cell therapy; proteome; fibrosis	RESPIRATORY-DISTRESS-SYNDROME; STEM-CELLS; PULMONARY-FIBROSIS; DIFFERENTIATION; GLUTATHIONE; ACTIVATION; EXPRESSION; MARKERS; PATHWAY	Rationale: There are controversial reports on applications of mesenchymal stromal cells (MSCs) in patients with acute respiratory distress syndrome (ARDS). Objectives: We hypothesized that lung microenvironment was the main determinant of beneficial versus detrimental effects of MSCs during ARDS. Methods: Lung proteome was profiled in three models of injury induced by acid instillation and/or mec…	[Islam, Diana; Huang, Yongbo; Wu, Sulong; Khang, Julie; Han, Bing; Li, Manshu; Xu, Yonghao; Luo, Alice; Liu, Xiaoqing; Zhong, Nanshan; Li, Yimin; Zhang, Haibo] Guangzhou Med Univ, Affiliated Hosp 1, Guangzhou Inst Resp Dis, State Key Lab Resp Dis, Guangzhou, Guangdong, Peoples R China; [Islam, Diana; Fanelli, Vito; Khang, Julie; Han, Bing; Grassi, Alice; Li, Manshu; Xu, Yonghao; Luo, Alice; Wu, J…	Guangzhou Medical University; State Key Laboratory of Respiratory Disease; University of Toronto; Saint Michaels Hospital Toronto; University of Turin; University of Turin; Medical College of Wisconsin; Southeast University - China; University of Toronto; University Health Network Toronto; University of Toronto; University of Toronto; University of Toronto; University of Toronto; Ollscoil na Gail…	Li, YM (corresponding author), 151 Yanjiang Rd West, Guangzhou 510120, Guangdong, Peoples R China.	dryiminli@vip.163.com	Qiu, Haibo/AAS-9047-2021; Laffey, John/G-4204-2010; Xu, Yonghao/HLQ-5255-2023; Liu, Xiaoqing/C-5752-2009; Liu, Mingyao/JFK-7090-2023; Fanelli, Vito/K-4028-2018; Li, Manshu/AAE-8800-2019; Grassi, Alice/HTM-1754-2023; Zhang, Haibo/HLP-9266-2023	Zhang, Haibo/0000-0002-1714-3038; Medin, Jeffrey/0000-0001-8165-8995; Laffey, John/0000-0002-1246-9573; Huang, Yongbo/0000-0001-6798-0451; Liu, Mingyao/0000-0002-9188-8417; Qiu, Haibo/0000-0001-8589-4717; Grassi, Alice/0000-0003-4379-3808;	Canadian Institutes of Health Research [FDN143285, CCI132569]; National Nature Science Foundation of China [81770079, 81361128003, 81490530, 81490534, 81370177]; Clinical Innovation Research Program of Guangzhou Regenerative Medicine and Health Guangdong Laboratory [2018GZR0201002]	Canadian Institutes of Health Research(Canadian Institutes of Health Research (CIHR)); National Nature Science Foundation of China(National Natural Science Foundation of China (NSFC)); Clinical Innovation Research Program of Guangzhou Regenerative Medicine and Health Guangdong Laboratory	Funded in part by the Canadian Institutes of Health Research (FDN143285 and CCI132569, H.Z.), the National Nature Science Foundation of China (81770079, Y.L.; 81361128003, Y.L. and H.Z.; 81490530 and 81490534, N.Z. and H.Z.; and 81370177, H.Z.), and Clinical Innovation Research Program of Guangzhou Regenerative Medicine and Health Guangdong Laboratory (2018GZR0201002, H.Z.).		50	106	116	0	93	AMER THORACIC SOC	NEW YORK	25 BROADWAY, 18 FL, NEW YORK, NY 10004 USA	1073-449X	1535-4970		AM J RESP CRIT CARE	Am. J. Respir. Crit. Care Med.	MAY 15	2019	199	10
J	Lim, EY; Lee, SY; Shin, HS; Kim, GD				Lim, Eun Yeong; Lee, So-Young; Shin, Hee Soon; Kim, Gun-Dong			Reactive Oxygen Species and Strategies for Antioxidant Intervention in Acute Respiratory Distress Syndrome	ANTIOXIDANTS			English	Review						acute respiratory distress syndrome; reactive oxygen species; antioxidant; acute lung injury; superoxide dismutase; glutathione; vitamins	ACUTE LUNG INJURY; NF-KAPPA-B; ALPHA-LIPOIC ACID; SUPEROXIDE-DISMUTASE; NADPH OXIDASE; VITAMIN-E; OXIDATIVE STRESS; REDOX REGULATION; INDUCED AIRWAY; RECRUITMENT MANEUVERS	Acute respiratory distress syndrome (ARDS) is a life-threatening pulmonary condition characterized by the sudden onset of respiratory failure, pulmonary edema, dysfunction of endothelial and epithelial barriers, and the activation of inflammatory cascades. Despite the increasing number of deaths attributed to ARDS, a comprehensive therapeutic approach for managing patients with ARDS remains elusi…	[Lim, Eun Yeong; Lee, So-Young; Shin, Hee Soon; Kim, Gun-Dong] Korea Food Res Inst KFRI, Div Food Funct Res, Wonju 55365, South Korea; [Lee, So-Young; Shin, Hee Soon] Korea Univ Sci & Technol UST, Dept Food Biotechnol, Daejeon 34113, South Korea	University of Science & Technology (UST)	Kim, GD (corresponding author), Korea Food Res Inst KFRI, Div Food Funct Res, Wonju 55365, South Korea.	l.eunyeong@kfri.re.kr; sylee09@kfri.re.kr; hsshin@kfri.re.kr; kgd@kfri.re.kr		Kim, Gundong/0000-0001-8518-5267; Shin, Hee Soon/0000-0002-0942-7161	Main Research Program (E0210202-03) of the Korea Food Research Institute (KFRI)	Main Research Program (E0210202-03) of the Korea Food Research Institute (KFRI)	No Statement Available		239	14	15	2	32	MDPI	BASEL	ST ALBAN-ANLAGE 66, CH-4052 BASEL, SWITZERLAND		2076-3921		ANTIOXIDANTS-BASEL	Antioxidants	NOV	2023	12	11
J	Duca, L; Ottolenghi, S; Coppola, S; Rinaldo, R; Dei Cas, M; Rubino, FM; Paroni, R; Samaja, M; Chiumello, DA; Motta, I				Duca, Lorena; Ottolenghi, Sara; Coppola, Silvia; Rinaldo, Rocco; Dei Cas, Michele; Rubino, Federico Maria; Paroni, Rita; Samaja, Michele; Chiumello, Davide Alberto; Motta, Irene			Differential Redox State and Iron Regulation in Chronic Obstructive Pulmonary Disease, Acute Respiratory Distress Syndrome and Coronavirus Disease 2019	ANTIOXIDANTS			English	Article						acute hypoxia; chronic hypoxia; hepcidin; iron; erythropoiesis; antioxidant barrier; redox imbalance	HEMOGLOBIN LEVELS; HEPCIDIN; GLUTATHIONE; DEFICIENCY; METABOLISM	In patients affected by Acute Respiratory Distress Syndrome (ARDS), Chronic Obstructive Pulmonary Disease (COPD) and Coronavirus Disease 2019 (COVID-19), unclear mechanisms negatively interfere with the hematopoietic response to hypoxia. Although stimulated by physiological hypoxia, pulmonary hypoxic patients usually develop anemia, which may ultimately complicate the outcome. To characterize thi…	[Duca, Lorena; Motta, Irene] Fdn IRCCS Ca Granda Osped Maggiore Policlin, Gen Med Unit, I-20122 Milan, Italy; [Ottolenghi, Sara; Dei Cas, Michele; Rubino, Federico Maria; Paroni, Rita; Samaja, Michele; Chiumello, Davide Alberto] Univ Milan, Dept Hlth Sci, I-20142 Milan, Italy; [Coppola, Silvia; Chiumello, Davide Alberto] ASST Santi Paolo & Carlo, Dept Anesthesia & Intens Care, I-20142 Milan, Ital…	IRCCS Ca Granda Ospedale Maggiore Policlinico; University of Milan; University of Milan	Ottolenghi, S (corresponding author), Univ Milan, Dept Hlth Sci, I-20142 Milan, Italy.	lorena.duca@policlinico.mi.it; Sara.Ottolenghi@unimi.it; silvia_coppola@libero.it; rocco.rinaldo@unimi.it; michele.deicas@unimi.it; federico.rubino@unimi.it; rita.paroni@unimi.it; michele.samaja@unimi.it; davide.chiumello@unimi.it; irene.motta@unimi.it	Samaja, Michele/N-3499-2013; Rinaldo, Rocco Francesco/HIR-5424-2022; PARONI, RITA/AAC-6265-2020; Motta, Irene/AAC-3087-2019; Rubino, Federico/A-6277-2008; Ottolenghi, Sara/AAC-6146-2020; Duca, Lorena/K-6909-2012; PARONI, RITA/C-2955-2012; Dei Cas, Michele/AAO-2132-2020; chiumello, davide/JDW-4119-2023	Samaja, Michele/0000-0002-0705-340X; Rinaldo, Rocco Francesco/0000-0003-3999-5298; Dei Cas, Michele/0000-0001-7359-8558; Ottolenghi, Sara/0000-0003-2988-0593; Coppola, Silvia/0000-0001-9290-5090; Motta, Irene/0000-0001-5701-599X; Rubino, Federico Maria/0000-0001-9620-1883; PARONI, RITA/0000-0002-3186-8860; Duca, Lorena/0000-0002-2008-3187;	Department of Health Science, University of Milan; Concorde Project [PNRA18_00071_Prot. 20891.21-11-2019]; HITCoA FISR-COVID-19 Project [FISR2020IP_01583]	Department of Health Science, University of Milan; Concorde Project; HITCoA FISR-COVID-19 Project	This research was funded by the Department of Health Science, University of Milan, the Concorde Project PNRA18_00071_Prot. 20891.21-11-2019, and the HITCoA FISR-COVID-19 Project FISR2020IP_01583.		48	23	23	0	7	MDPI	BASEL	ST ALBAN-ANLAGE 66, CH-4052 BASEL, SWITZERLAND		2076-3921		ANTIOXIDANTS-BASEL	Antioxidants	SEP	2021	10	9
J	Deng, GY; Dai, CY; Chen, JY; Ji, AQ; Zhao, JP; Zhai, Y; Kang, YJ; Liu, XJ; Wang, Y; Wang, QG				Deng, Guoying; Dai, Chenyun; Chen, Jinyuan; Ji, Anqi; Zhao, Jingpeng; Zhai, Yue; Kang, Yingjie; Liu, Xijian; Wang, Yin; Wang, Qiugen			Porous Se@SiO2 nanocomposites protect the femoral head from methylprednisolone-induced osteonecrosis	INTERNATIONAL JOURNAL OF NANOMEDICINE			English	Article						porous Se@SiO2 nanocomposites; methylprednisolone; osteonecrosis of femoral head; ROS damage; ARDS	STEROID-INDUCED OSTEONECROSIS; ACUTE LUNG INJURY; OXIDATIVE STRESS; ELEMENTAL SELENIUM; IN-VITRO; TOXICITY; RATS; SIZE; NANOPARTICLES; DAMAGE	Background: Methylprednisolone (MPS) is an important drug used in therapy of many diseases. However, osteonecrosis of the femoral head is a serious damage in the MPS treatment. Thus, it is imperative to develop new drugs to prevent the serious side effect of MPS. Methods: The potential interferences Se@SiO2 nanocomposites may have to the therapeutic effect of methylprednisolone (MPS) were evaluat…	[Deng, Guoying; Chen, Jinyuan; Ji, Anqi; Zhao, Jingpeng; Zhai, Yue; Wang, Qiugen] Shanghai Jiao Tong Univ, Shanghai Gen Hosp, Trauma Ctr, Sch Med, 650 Xin Songjiang Rd, Shanghai 201620, Peoples R China; [Dai, Chenyun] Shanghai Jiao Tong Univ, Sch Med, Shanghai Gen Hosp, Inst Translat Med, Shanghai, Peoples R China; [Kang, Yingjie] Shanghai Univ Tradit Chinese Med, Shuguang Hosp, Dept Radiol, Shan…	Shanghai Jiao Tong University; Shanghai Jiao Tong University; Shanghai University of Traditional Chinese Medicine; Shanghai University of Engineering Science; Tongji University	Wang, QG (corresponding author), Shanghai Jiao Tong Univ, Shanghai Gen Hosp, Trauma Ctr, Sch Med, 650 Xin Songjiang Rd, Shanghai 201620, Peoples R China.;Wang, Y (corresponding author), Tongji Univ, Shanghai Pulm Hosp, Ultrasound Dept, 507 Zhengmin Rd, Shanghai 200433, Peoples R China.	lpbbl@aliyun.com; wangqiugen@126.com	Deng, Guoying/L-4150-2019; liu, xinyi/KFB-4466-2024		Post-Graduation Innovation Subject of Shanghai Jiao Tong University [BXJ201734]; Fund for Construction of Trauma Center of Shanghai First People's Hospital [1304]; Songjiang District Trauma Linkage System Construction fund [0702N14004]	Post-Graduation Innovation Subject of Shanghai Jiao Tong University; Fund for Construction of Trauma Center of Shanghai First People's Hospital; Songjiang District Trauma Linkage System Construction fund	This study was funded by the Post-Graduation Innovation Subject of Shanghai Jiao Tong University (BXJ201734), Fund for Construction of Trauma Center of Shanghai First People's Hospital (No. 1304), and Songjiang District Trauma Linkage System Construction fund (0702N14004).		27	25	26	0	30	DOVE MEDICAL PRESS LTD	ALBANY	PO BOX 300-008, ALBANY, AUCKLAND 0752, NEW ZEALAND	1178-2013			INT J NANOMED	Int. J. Nanomed.		2018	13
J	Wang, XD; Zhang, CH; Zou, N; Chen, QH; Wang, CJ; Zhou, X; Luo, L; Qi, HB; Li, JH; Liu, ZY; Yi, JH; Li, J; Liu, W				Wang, Xiaodong; Zhang, Chunhua; Zou, Na; Chen, Qinghua; Wang, Chaojun; Zhou, Xu; Luo, Li; Qi, Haibin; Li, Junhua; Liu, Zhiyan; Yi, Jinghong; Li, Jing; Liu, Wei			Lipocalin-2 silencing suppresses inflammation and oxidative stress of acute respiratory distress syndrome by ferroptosis via inhibition of MAPK/ERK pathway in neonatal mice	BIOENGINEERED			English	Article						Acute respiratory distress syndrome; neonatal mice; Lipocalin-2; ferroptosis; MAPK; ERK pathway	ACUTE LUNG INJURY; NEUTROPHIL LIPOCALIN; GENE-EXPRESSION; INFANTS; COMPLEX; NGAL; ARDS	Neonatal acute respiratory distress syndrome (ARDS) has high morbidity and mortality rates worldwide, but there is a lack of pharmacologic treatment and clinical targeted therapies. In this study, we aimed to explore the effects of Lipocalin-2 (LCN2) on ferroptosis-mediated inflammation and oxidative stress in neonatal ARDS and the potential mechanism. In this study, we established an in vivo ARD…	[Wang, Xiaodong; Zhang, Chunhua; Zou, Na; Chen, Qinghua; Wang, Chaojun; Zhou, Xu; Qi, Haibin; Li, Junhua; Yi, Jinghong] Three Gorges Univ, Clin Med Coll Women & Children, Yichang Maternal & Child Hlth Care Hosp, Dept Neonatol, Yichang, Peoples R China; [Luo, Li] Three Gorges Univ, Clin Med Coll Women & Children, Yichang Maternal & Child Hlth Care Hosp, Dept Pediat, Yichang, Peoples R China; [Liu,…	China Three Gorges University; China Three Gorges University; China Three Gorges University; China Three Gorges University; Huazhong University of Science & Technology	Liu, W (corresponding author), Huazhong Univ Sci & Technol, Tongji Hosp, Tongji Med Coll, 1095 Jiefang Ave, Wuhan 430030, Hubei, Peoples R China.	liuwei_doc@163.com	Zhang, Chunhua/ISB-1530-2023; chen, qinghua/AFW-9446-2022; Wang, Shaoxin/JKH-8763-2023						47	76	85	2	69	TAYLOR & FRANCIS INC	PHILADELPHIA	530 WALNUT STREET, STE 850, PHILADELPHIA, PA 19106 USA	2165-5979	2165-5987		BIOENGINEERED	Bioengineered	JAN 1	2022	13	1
J	de Oliveira, GP; Kitoko, JZ; Lima-Gomes, PD; Rochael, NC; de Araújo, CC; Lugon, PN; dos Santos, HL; Martins, EGL; Ornellas, FM; de Oliveira, HD; Morales, MM; Olsen, PC; Galina, A; Silva, PL; Saraiva, EM; Pelosi, P; Rocco, PRM				de Oliveira, Gisele Pena; Kitoko, Jamil Zola; Lima-Gomes, Phillipe de Souza; Rochael, Natalia Cadaxo; de Araujo, Carla Cristina; Lugon, Pamella Nowaski; dos Santos, Heloisa Lopes; Lopes Martins, Eduarda Gabrielle; Ornellas, Felipe Mateus; de Oliveira, Helena D'Anunciacao; Morales, Marcelo Marcos; Olsen, Priscilla Christina; Galina, Antonio; Silva, Pedro Leme; Saraiva, Elvira Maria; Pelosi, Paolo;…			Glutamine Therapy Reduces Inflammation and Extracellular Trap Release in Experimental Acute Respiratory Distress Syndrome of Pulmonary Origin	NUTRIENTS			English	Article						glutamine; pulmonary acute respiratory distress syndrome; lung mechanics; extracellular traps; reactive oxygen species	ACUTE LUNG INJURY; LIPOPOLYSACCHARIDE; NEUTROPHILS; ACTIVATION; EXPRESSION; PATHWAY	The innate immune response plays an important role in the pathophysiology of acute respiratory distress syndrome (ARDS). Glutamine (Gln) decreases lung inflammation in experimental ARDS, but its impact on the formation of extracellular traps (ETs) in the lung is unknown. In a mouse model of endotoxin-induced pulmonary ARDS, the effects of Gln treatment on leukocyte counts and ET content in bronch…	[de Oliveira, Gisele Pena; Kitoko, Jamil Zola; de Araujo, Carla Cristina; Lugon, Pamella Nowaski; dos Santos, Heloisa Lopes; Silva, Pedro Leme; Macedo Rocco, Patricia Rieken] Univ Fed Rio de Janeiro, Carlos Chagas Filho Inst Biophys, Lab Pulm Invest, BR-21941902 Rio De Janeiro, Brazil; [Kitoko, Jamil Zola; Olsen, Priscilla Christina] Univ Fed Rio de Janeiro, Dept Toxicol & Clin Anal, Lab Clin Bac…	Universidade Federal do Rio de Janeiro; Universidade Federal do Rio de Janeiro; Universidade Federal do Rio de Janeiro; Universidade Federal do Rio de Janeiro; Universidade Federal do Rio de Janeiro; University of Genoa	Rocco, PRM (corresponding author), Univ Fed Rio de Janeiro, Carlos Chagas Filho Inst Biophys, Lab Pulm Invest, BR-21941902 Rio De Janeiro, Brazil.	giselepoliv@gmail.com; jamilkitoko@hotmail.com; lima.phillipe@gmail.com; natyrochael@yahoo.com.br; dearaujo.carlacristina@gmail.com; pamellalugon@yahoo.com.br; heloisalopes_s2@hotmail.com; eduarda_gabrielle@hotmail.com; fmornellas@gmail.com; hdanunciacao@gmail.com; mmorales@biof.ufrj.br; priscillachristinaolsen@gmail.com; galina@bioqmed.ufrj.br; pedro.leme@gmail.com; esaraiva@micro.ufrj.br; ppelo…	Rocco, Patricia/I-7460-2012; Olsen, Priscilla/I-8994-2012; Saraiva, Elvira/L-2864-2017; Oliveira, Helena/AAR-6862-2020; Ornellas, Felipe/ABD-5301-2020; Araujo Alves, Carla Cristina/P-3607-2014; Kitoko, Jamil/D-1694-2016; Saraiva, Elvira Maria/L-2864-2017; Kitoko, Jamil/AAY-1595-2020; Silva, Pedro/JHU-4205-2023; Araújo Alves, Carla Cristina/P-3607-2014; Galina, Antonio/A-9292-2008; Morales, Marcel…	Galina, Antonio/0000-0003-2862-8820; Olsen, Priscilla/0000-0002-8795-037X; de Oliveira, Helena/0000-0003-2744-3496; Ornellas, Felipe/0000-0001-7808-0897; Araujo Alves, Carla Cristina/0000-0003-0986-6399; Pelosi, Paolo/0000-0001-5055-3023; Rieken Macedo Rocco, Patricia/0000-0003-1412-7136; Kitoko, Jamil/0000-0003-0973-5460; Silva, Pedro/0000-0001-5838-4949; Saraiva, Elvira Maria/0000-0002-6388-528…	Carlos Chagas Filho Rio de Janeiro State Research Foundation (FAPERJ), Rio de Janeiro, Brazil [E-26/103.118/2]; Brazilian Council for Scientific and Technological Development (CNPq), Brasilia, Brazil [421067/2016-0]; Department of Science and Technology-Brazilian Ministry of Health (DECIT/MS) [469716/2014-2]; Coordination for the Improvement of Higher Education Personnel (CAPES), Brasilia, Brazil…	Carlos Chagas Filho Rio de Janeiro State Research Foundation (FAPERJ), Rio de Janeiro, Brazil(Fundacao Carlos Chagas Filho de Amparo a Pesquisa do Estado do Rio De Janeiro (FAPERJ)); Brazilian Council for Scientific and Technological Development (CNPq), Brasilia, Brazil(Conselho Nacional de Desenvolvimento Cientifico e Tecnologico (CNPQ)); Department of Science and Technology-Brazilian Ministry o…	Grants from the Carlos Chagas Filho Rio de Janeiro State Research Foundation (FAPERJ) (grant number E-26/103.118/2), Rio de Janeiro, Brazil; the Brazilian Council for Scientific and Technological Development (CNPq) (grant number 421067/2016-0), Brasilia, Brazil; the Department of Science and Technology-Brazilian Ministry of Health (DECIT/MS) (grant number 469716/2014-2); and Coordination for the …		46	23	25	1	12	MDPI	BASEL	ST ALBAN-ANLAGE 66, CH-4052 BASEL, SWITZERLAND	2072-6643			NUTRIENTS	Nutrients	APR	2019	11	4
J	Bellanti, F; Kasperczyk, S; Kasperczyk, A; Dobrakowski, M; Pacilli, G; Vurchio, G; Maddalena, A; Quiete, S; Lo Buglio, A; Capurso, C; Serviddio, G; Vendemiale, G				Bellanti, Francesco; Kasperczyk, Slawomir; Kasperczyk, Aleksandra; Dobrakowski, Michal; Pacilli, Gabriella; Vurchio, Giuseppina; Maddalena, Alessandro; Quiete, Stefano; Lo Buglio, Aurelio; Capurso, Cristiano; Serviddio, Gaetano; Vendemiale, Gianluigi			Alteration of circulating redox balance in coronavirus disease-19-induced acute respiratory distress syndrome	JOURNAL OF INTENSIVE CARE			English	Article						Acute respiratory distress syndrome; COVID-19; Respiratory failure; Redox-dependent markers; Erythrocyte oxidative stress; Inflammation; Hypercoagulability	OXIDATIVE STRESS	BackgroundMechanisms underpinning ARDS induced by COVID-19 are mostly immune-mediated, but need to be completely clarified. This study aimed to investigate redox balance in COVID-19 patients with ARDS, trying to recognize possible differences from typical ARDS related to the pathophysiology of severe disease.MethodsPatients affected by ARDS and positive for the SARS-CoV-2 virus (N = 40, COVID-19)…	[Bellanti, Francesco; Pacilli, Gabriella; Vurchio, Giuseppina; Maddalena, Alessandro; Quiete, Stefano; Lo Buglio, Aurelio; Capurso, Cristiano; Serviddio, Gaetano; Vendemiale, Gianluigi] Univ Foggia, Dept Med & Surg Sci, Viale Pinto 1, I-71122 Foggia, Italy; [Kasperczyk, Slawomir; Kasperczyk, Aleksandra; Dobrakowski, Michal] Med Univ Silesia, Div Dent Zabrze, Dept Biochem, Sch Med, PL-41808 Zabrze…	University of Foggia; Medical University of Silesia	Bellanti, F (corresponding author), Univ Foggia, Dept Med & Surg Sci, Viale Pinto 1, I-71122 Foggia, Italy.	francesco.bellanti@unifg.it	serviddio, gaetano/C-7629-2011; Lo Buglio, Aurelio/ABC-5292-2020; Bellanti, Francesco/K-4059-2016; quiete, stefano/LSI-6681-2024; Capurso, Cristiano/AAC-1683-2019	Lo Buglio, Aurelio/0000-0003-1569-3658; BELLANTI, Francesco/0000-0002-8196-7373; Dobrakowski, Michal/0000-0001-8399-7624; Kasperczyk, Aleksandra/0000-0002-2035-0388; Kasperczyk, Slawomir/0000-0001-8974-5786;					33	3	3	0	3	BMC	LONDON	CAMPUS, 4 CRINAN ST, LONDON N1 9XW, ENGLAND	2052-0492			J INTENSIVE CARE	J. Intensive Care	JUL 5	2023	11	1
J	Kakavas, S; Demestiha, T; Vasileiou, P; Xanthos, T				Kakavas, Sotirios; Demestiha, Theano; Vasileiou, Panagiotis; Xanthos, Theodoros			Erythropoetin as a novel agent with pleiotropic effects against acute lung injury	EUROPEAN JOURNAL OF CLINICAL PHARMACOLOGY			English	Review						Erythropoietin; Acute lung injury; Acute respiratory distress syndrome; ALI; ARDS	RECOMBINANT-HUMAN-ERYTHROPOIETIN; RESPIRATORY-DISTRESS-SYNDROME; EPITHELIAL-CELL APOPTOSIS; ORGAN DYSFUNCTION SYNDROME; ENDOTHELIAL GROWTH-FACTOR; INFLAMMATORY RESPONSE; GENE-THERAPY; NITRIC-OXIDE; GLUTATHIONE-PEROXIDASE; NEUTROPHIL RECRUITMENT	Current pharmacotherapy for acute lung injury (ALI) and acute respiratory distress syndrome (ARDS) is not optimal, and the biological and physiological complexity of these severe lung injury syndromes requires consideration of combined-agent treatments or agents with pleiotropic action. In this regard, exogenous erythropoietin (EPO) represents a possible candidate since a number of preclinical st…	[Kakavas, Sotirios; Demestiha, Theano; Vasileiou, Panagiotis; Xanthos, Theodoros] Univ Athens, Sch Med, Dept Anat, GR-11527 Athens, Greece	National & Kapodistrian University of Athens	Xanthos, T (corresponding author), Univ Athens, Sch Med, Dept Anat, POB 11527,75 M Asias, GR-11527 Athens, Greece.	theodorosxanthos@yahoo.com	; Xanthos, Theodoros/HKF-6214-2023	Vasileiou, Panagiotis/0000-0002-6739-0619; Kakavas, Sotirios/0000-0003-0079-2477;					85	24	34	0	15	SPRINGER HEIDELBERG	HEIDELBERG	TIERGARTENSTRASSE 17, D-69121 HEIDELBERG, GERMANY	0031-6970	1432-1041		EUR J CLIN PHARMACOL	Eur. J. Clin. Pharmacol.	JAN	2011	67	1
J	Liu, X; Zhang, JQ; Xie, W				Liu, Xin; Zhang, Junqiang; Xie, Wang			The role of ferroptosis in acute lung injury	MOLECULAR AND CELLULAR BIOCHEMISTRY			English	Article						Ferroptosis; Glutathione peroxidase 4; Lipid peroxidation; Acute lung injury	CELL-DEATH; ISCHEMIA-REPERFUSION; FATTY-ACIDS; DEFEROXAMINE; PATHOGENESIS; PEROXIDATION; INFLAMMATION; FORM; ALI	Acute lung injury/acute respiratory distress syndrome (ALI/ARDS) is a common disease with high morbidity and mortality, and its pathogenesis is believed to be related to oxidative stress, apoptosis, inflammation, and hypoxia. Ferroptosis is a type of nonapoptotic cell death characterized by iron-dependent lipid peroxide accumulation and is involved in many cellular physiological processes. Recent…	[Liu, Xin; Zhang, Junqiang] BengBu Med Coll, Bengbu 233030, Anhui, Peoples R China; [Zhang, Junqiang; Xie, Wang] Univ Sci & Technol China, Affiliated Hosp USTC 1, Dept Pulm & Crit Care Med, Div Life Sci & Med, Hefei 230036, Anhui, Peoples R China	Bengbu Medical University; Chinese Academy of Sciences; University of Science & Technology of China, CAS	Zhang, JQ (corresponding author), BengBu Med Coll, Bengbu 233030, Anhui, Peoples R China.;Zhang, JQ; Xie, W (corresponding author), Univ Sci & Technol China, Affiliated Hosp USTC 1, Dept Pulm & Crit Care Med, Div Life Sci & Med, Hefei 230036, Anhui, Peoples R China.	yany1980@126.com; xiewang_88@163.com		Xie, Wang/0000-0001-5793-4881	National Natural Science Foundation of China [82000082]; Natural Science Foundation Of Anhui Province [2008085QH353]; Fundamental Research Funds for the Central University [WK9110000124]	National Natural Science Foundation of China(National Natural Science Foundation of China (NSFC)); Natural Science Foundation Of Anhui Province(Natural Science Foundation of Anhui Province); Fundamental Research Funds for the Central University	This work was supported by the National Natural Science Foundation of China (82000082), the Natural Science Foundation Of Anhui Province (2008085QH353), and the Fundamental Research Funds for the Central University (WK9110000124).		78	63	76	5	40	SPRINGER	DORDRECHT	VAN GODEWIJCKSTRAAT 30, 3311 GZ DORDRECHT, NETHERLANDS	0300-8177	1573-4919		MOL CELL BIOCHEM	Mol. Cell. Biochem.	MAY	2022	477	5
J	Britt, RD; Velten, M; Locy, ML; Rogers, LK; Tipple, TE				Britt, Rodney D., Jr.; Velten, Markus; Locy, Morgan L.; Rogers, Lynette K.; Tipple, Trent E.			The Thioredoxin Reductase-1 Inhibitor Aurothioglucose Attenuates Lung Injury and Improves Survival in a Murine Model of Acute Respiratory Distress Syndrome	ANTIOXIDANTS & REDOX SIGNALING			English	Article							EXHALED BREATH CONDENSATE; PULMONARY OXYGEN-TOXICITY; UNSTABLE CYSTIC-FIBROSIS; GLUTATHIONE-REDUCTASE; SAUDI-ARABIA; CLARA CELLS; LIPOPOLYSACCHARIDE; INFLAMMATION; HYPEROXIA; 8-ISOPROSTANE	Aims: Inflammation and oxygen toxicity increase free radical production and contribute to the development of acute respiratory distress syndrome (ARDS), which is a significant cause of morbidity and mortality in intensive care patients. We have previously reported increased glutathione (GSH) levels in lung epithelial cells in vitro and attenuated adult murine hyperoxic lung injury in vivo after p…	[Britt, Rodney D., Jr.; Locy, Morgan L.; Rogers, Lynette K.; Tipple, Trent E.] Nationwide Childrens Hosp, Res Inst, Ctr Perinatal Res, Columbus, OH 43215 USA; [Velten, Markus] Univ Bonn, Univ Med Ctr, Dept Anesthesiol & Intens Care Med, Bonn, Germany; [Rogers, Lynette K.; Tipple, Trent E.] Ohio State Univ, Dept Pediat, Coll Med, Columbus, OH 43210 USA	University System of Ohio; Ohio State University; Nationwide Childrens Hospital; Research Institute at Nationwide Children's Hospital; Center for Perinatal Research; University of Bonn; University System of Ohio; Ohio State University	Tipple, TE (corresponding author), Nationwide Childrens Hosp, Res Inst, Ctr Perinatal Res, 575 Childrens Crossrd, Columbus, OH 43215 USA.	trent.tipple@nationwidechildrens.org	Tipple, Trent/AAG-4195-2021; Britt, Rodney/AAA-8253-2022; Rogers, Lynette/V-6802-2019; Velten, Markus/P-3078-2018	Locy, Morgan/0000-0002-3812-5867; Tipple, Trent/0000-0002-5156-4282	National Institutes of Health [F31HL097619, R01AT006880, K08HL093365-03]; Deutsche Forschungsgemeinschaft [VE 614/1-1]	National Institutes of Health(United States Department of Health & Human ServicesNational Institutes of Health (NIH) - USA); Deutsche Forschungsgemeinschaft(German Research Foundation (DFG))	The authors would like to thank Lyn Wancket, DVM, for her expert assistance with animal studies and funding from National Institutes of Health (R. D. B. F31HL097619, L. K. R. R01AT006880, and T. E. T. K08HL093365-03) and the Deutsche Forschungsgemeinschaft (M.V., VE 614/1-1).		42	34	41	1	11	MARY ANN LIEBERT, INC	NEW ROCHELLE	140 HUGUENOT STREET, 3RD FL, NEW ROCHELLE, NY 10801 USA	1523-0864	1557-7716		ANTIOXID REDOX SIGN	Antioxid. Redox Signal.	JUN 10	2014	20	17
J	Karagiannis, F; Peukert, K; Surace, L; Michla, M; Nikolka, F; Fox, M; Weiss, P; Feuerborn, C; Maier, P; Schulz, S; Al, B; Seeliger, B; Welte, T; David, S; Grondman, I; de Nooijer, AH; Pickkers, P; Kleiner, JL; Berger, MM; Brenner, T; Putensen, C; Kato, H; Garbi, N; Netea, MG; Hiller, K; Placek, K; Bode, C; Wilhelm, C				Karagiannis, Fotios; Peukert, Konrad; Surace, Laura; Michla, Marcel; Nikolka, Fabian; Fox, Mario; Weiss, Patricia; Feuerborn, Caroline; Maier, Paul; Schulz, Susanne; Al, Burcu; Seeliger, Benjamin; Welte, Tobias; David, Sascha; Grondman, Inge; de Nooijer, Aline H.; Pickkers, Peter; Kleiner, Jan Lukas; Berger, Marc Moritz; Brenner, Thorsten; Putensen, Christian; Kato, Hiroki; Garbi, Natalio; Netea,…		Bonn COVIMMUNE Consortium	Impaired ketogenesis ties metabolism to T cell dysfunction in COVID-19	NATURE			English	Article							TOLERANCE; REGULATOR; STATE	Anorexia and fasting are host adaptations to acute infection, and induce a metabolic switch towards ketogenesis and the production of ketone bodies, including beta-hydroxybutyrate (BHB)(1-6). However, whether ketogenesis metabolically influences the immune response in pulmonary infections remains unclear. Here we show that the production of BHB is impaired in individuals with SARS-CoV-2-induced a…	[Karagiannis, Fotios; Surace, Laura; Michla, Marcel; Weiss, Patricia; Maier, Paul; Wilhelm, Christoph] Univ Bonn, Univ Hosp Bonn, Med Fac, Inst Clin Chem & Clin Pharmacol,Immunopathol Unit, Bonn, Germany; [Peukert, Konrad; Surace, Laura; Fox, Mario; Feuerborn, Caroline; Schulz, Susanne; Kleiner, Jan Lukas; Putensen, Christian; Bode, Christian] Univ Hosp Bonn, Dept Anesthesiol & Intens Care Med, B…	University of Bonn; University of Bonn; Braunschweig University of Technology; University of Bonn; Hannover Medical School; Hannover Medical School; University of Zurich; University Zurich Hospital; Radboud University Nijmegen; Radboud University Nijmegen; Radboud University Nijmegen; University of Duisburg Essen; University of Bonn; University of Bonn	Wilhelm, C (corresponding author), Univ Bonn, Univ Hosp Bonn, Med Fac, Inst Clin Chem & Clin Pharmacol,Immunopathol Unit, Bonn, Germany.;Bode, C (corresponding author), Univ Hosp Bonn, Dept Anesthesiol & Intens Care Med, Bonn, Germany.	christian.bode@ukbonn.de; christoph.wilhelm@uni-bonn.de	; Surace, Laura/LZH-6176-2025; Netea, Mihai/N-5155-2014; Berger, Marc/JHV-1227-2023; Wilhelm, Christoph/ABE-7176-2020; Maier, Paul/GWC-1901-2022; Placek, Katarzyna/AAK-2475-2021; Karagiannis, Fotios/JOZ-8750-2023; Pickkers, P./H-8080-2014; Bode, Christian/AAL-1486-2021; Seeliger, Benjamin/W-3220-2019; David, Sascha/AAL-6909-2021; de Nooijer, Aline/ABC-6816-2020; Garbi, Natalio/H-7666-2014	Berger, Marc Moritz/0000-0001-6771-3193; David, Sascha/0000-0002-8231-0461; Hiller, Karsten/0000-0001-9322-5820; Kummerer, Beate Mareike/0000-0002-9011-2764; Karagiannis, Fotios/0000-0002-1030-0635; Bode, Christian/0000-0002-0830-870X; Maier, Paul Nikolaus/0000-0001-6606-3926; Wilhelm, Christoph/0000-0002-9839-0291; surace, laura/0000-0001-8152-0611;	Deutsche Forschungsgemeinschaft (DFG; German Research Foundation) [EXC2151, 390873048]; Ministry for Science and Education of the Republic of Germany (BMBF) [COVIMMUNE/01KI20343]; DFG [DA1209/4-3, BO 3640/2-1/WI 4554/4-1]; ERC Advanced Grant [833247]; Spinoza Grant of the Netherlands Organization for Scientific Research; COVID Sittich	Deutsche Forschungsgemeinschaft (DFG; German Research Foundation)(German Research Foundation (DFG)); Ministry for Science and Education of the Republic of Germany (BMBF)(Federal Ministry of Education & Research (BMBF)); DFG(German Research Foundation (DFG)); ERC Advanced Grant(European Research Council (ERC)); Spinoza Grant of the Netherlands Organization for Scientific Research; COVID Sittich	C.W. was supported by the Deutsche Forschungsgemeinschaft (DFG; German Research Foundation) under Germany's Excellence Strategy (EXC2151, 390873048), a DFG program grant (C.W. and C.B.; BO 3640/2-1/WI 4554/4-1) and the Ministry for Science and Education of the Republic of Germany (COVIMMUNE/01KI20343, BMBF). S.D. is supported by the DFG (DA1209/4-3). M.G.N. was supported by an ERC Advanced Grant …		52	105	111	2	45	NATURE PORTFOLIO	BERLIN	HEIDELBERGER PLATZ 3, BERLIN, 14197, GERMANY	0028-0836	1476-4687		NATURE	Nature	SEP 22	2022	609	7928
J	Rechreche, H; Abbes, A; Iovanna, JL				Rechreche, Hocine; Abbes, Arbia; Iovanna, Juan Lucio			Induction of antioxidant mechanisms in lung during experimental pancreatitis in rats	INDIAN JOURNAL OF EXPERIMENTAL BIOLOGY			English	Article						ARDS; Caerulein; HSP-70; Inflammation; Mn-SOD; mRNA expression	FREE-RADICALS; GENE-EXPRESSION; MN-SOD; STRESS; INHIBITION; ACTIVATION; GENERATION; INJURY; HSP70; CELLS	Lung complications are the most common cause of death in patients with acute pancreatitis. In this study, we investigated how induction of mild acute pancreatitis could modify the course of lung inflammation, eventually, induced by a severe acute pancreatitis in rats. A severe and a mild forms of an experimental acute pancreatitis were respectively established by intraductal administration of sod…	[Rechreche, Hocine; Abbes, Arbia] MSB Univ Jijel, Nat & Life Sci Fac, Mol & Cellular Biol Lab MCBL, Jijel, Algeria; [Iovanna, Juan Lucio] Aix Marseille Univ, Ctr Res Cancerol Marseille CRCM, INSERM, CNRS,UMR 7258,UMR1068, Marseille, France; [Iovanna, Juan Lucio] Inst Paoli Calmettes, Marseille, France	Institut National de la Sante et de la Recherche Medicale (Inserm); Aix-Marseille Universite; Centre National de la Recherche Scientifique (CNRS); CNRS - National Institute for Biology (INSB); UNICANCER; Institut Paoli-Calmette (IPC)	Rechreche, H (corresponding author), MSB Univ Jijel, Nat & Life Sci Fac, Mol & Cellular Biol Lab MCBL, Jijel, Algeria.	horechre@yahoo.fr	Iovanna, Juan/M-9805-2017		MESRS (Ministere de l'Enseignement Superieur et de la Recherche Scientifique, Algeria); INSERM (Institut National pour la Sante et la Recherche Medical, France)	MESRS (Ministere de l'Enseignement Superieur et de la Recherche Scientifique, Algeria); INSERM (Institut National pour la Sante et la Recherche Medical, France)	This work was supported by MESRS (Ministere de l'Enseignement Superieur et de la Recherche Scientifique, Algeria) and INSERM (Institut National pour la Sante et la Recherche Medical, France).		40	3	3	0	2	NATL INST SCIENCE COMMUNICATION-NISCAIR	NEW DELHI	DR K S KRISHNAN MARG, PUSA CAMPUS, NEW DELHI 110 012, INDIA	0019-5189	0975-1009		INDIAN J EXP BIOL	Indian J. Exp. Biol.	MAY	2020	58	5
J	Zheng, YX; Huang, YB; Xu, YH; Sang, L; Liu, XQ; Li, YM				Zheng, Yongxin; Huang, Yongbo; Xu, Yonghao; Sang, Ling; Liu, Xiaoqing; Li, Yimin			Ferroptosis, pyroptosis and necroptosis in acute respiratory distress syndrome	CELL DEATH DISCOVERY			English	Review							GLUTATHIONE-PEROXIDASE 4; REGULATED CELL-DEATH; ACUTE LUNG INJURY; INFLAMMASOME ACTIVATION; NLRP3 INFLAMMASOME; LIPID-PEROXIDATION; FATTY-ACIDS; METABOLISM; MECHANISMS; TRIGGERS	Acute respiratory distress syndrome (ARDS) is an acute and uncontrolled pulmonary inflammation caused by various insults. Cell death is a critical mechanism in the pathogenesis of ARDS. Ferroptosis, a novel form of cell death defined as iron-mediated lipid peroxidation, has been shown to play a role in the pathogenesis of ARDS. Additionally, pyroptosis and necroptosis are also involved in the pat…	[Zheng, Yongxin; Huang, Yongbo; Xu, Yonghao; Sang, Ling; Liu, Xiaoqing; Li, Yimin] Guangzhou Med Univ, Affiliated Hosp 1, Guangzhou Inst Resp Hlth, Dept Resp & Crit Care Med,State Key Lab Resp Dis, Guangzhou 510120, Peoples R China	Guangzhou Medical University; State Key Laboratory of Respiratory Disease	Li, YM (corresponding author), Guangzhou Med Univ, Affiliated Hosp 1, Guangzhou Inst Resp Hlth, Dept Resp & Crit Care Med,State Key Lab Resp Dis, Guangzhou 510120, Peoples R China.	dryiminli@vip.163.com	; Xu, Yonghao/HLQ-5255-2023; liu, xq/JDW-2596-2023	Li, Yimin/0000-0003-0810-5256; Huang, Yongbo/0000-0001-6798-0451	National Natural Science Foundation of China [81870069, 82070084, 81970071]; Natural Science Foundation of Guangdong Province, China [2020A1515011459]; Science and Technology Program of Guangzhou, China [202102010366]	National Natural Science Foundation of China(National Natural Science Foundation of China (NSFC)); Natural Science Foundation of Guangdong Province, China(National Natural Science Foundation of Guangdong Province); Science and Technology Program of Guangzhou, China	AcknowledgementsThis study was funded by the National Natural Science Foundation of China (81870069, 82070084, 81970071), the Natural Science Foundation of Guangdong Province, China (2020A1515011459), The Science and Technology Program of Guangzhou, China (202102010366). The funding sources had no involvement in the study design; collection, analysis, and interpretation of data; or writing of the…		125	36	39	3	31	SPRINGERNATURE	LONDON	CAMPUS, 4 CRINAN ST, LONDON, N1 9XW, ENGLAND		2058-7716		CELL DEATH DISCOV	Cell Death Discov.	MAR 10	2023	9	1
J	Muhoberac, BB				Muhoberac, Barry B.			What Can Cellular Redox, Iron, and Reactive Oxygen Species Suggest About the Mechanisms and Potential Therapy of COVID-19?	FRONTIERS IN CELLULAR AND INFECTION MICROBIOLOGY			English	Article						COVID-19; redox; ROS— reactive oxygen species; glutathione; ascorbate; iron; chelators; ferroptosis	ASCORBIC-ACID; IRON(III)	Accumulating evidence suggests that there are important contributions to coronavirus disease (COVID-19) from redox imbalance and improperly coordinated iron, which cause cellular oxidative damage and stress. Cells have developed elaborate redox-dependent processes to handle and store iron, and their disfunction leads to several serious diseases. Cellular reductants are important as reactive oxyge…	[Muhoberac, Barry B.] Indiana Univ Purdue Univ, Dept Chem & Chem Biol, Indianapolis, IN 46202 USA	Purdue University System; Purdue University; Purdue University in Indianapolis	Muhoberac, BB (corresponding author), Indiana Univ Purdue Univ, Dept Chem & Chem Biol, Indianapolis, IN 46202 USA.	bmuhober@iupui.edu							17	28	32	0	13	FRONTIERS MEDIA SA	LAUSANNE	AVENUE DU TRIBUNAL FEDERAL 34, LAUSANNE, CH-1015, SWITZERLAND	2235-2988			FRONT CELL INFECT MI	Front. Cell. Infect. Microbiol.	DEC 14	2020	10
J	Mahmoodpoor, A; Hamishehkar, H; Shadvar, K; Ostadi, Z; Sanaie, S; Saghaleini, SH; Nader, ND				Mahmoodpoor, Ata; Hamishehkar, Hadi; Shadvar, Kamran; Ostadi, Zohreh; Sanaie, Sarvin; Saghaleini, Seied Hadi; Nader, Nader D.			The Effect of Intravenous Selenium on Oxidative Stress in Critically Ill Patients with Acute Respiratory Distress Syndrome	IMMUNOLOGICAL INVESTIGATIONS			English	Article						Antioxidant activity; Inflammatory response; Oxygen radicals; Respiratory distress	GLUTATHIONE-PEROXIDASE ACTIVITY; PATIENTS FOLLOWING SEPSIS; ACUTE LUNG INJURY; PARENTERAL SELENIUM; ANTIOXIDANT STATUS; N-ACETYLCYSTEINE; ACID; SUPPLEMENTATION; ASPIRATION; MECHANISMS	Objective: To modulate the inflammatory response in respiratory distress syndrome (ARDS) with selenium. Background: Selenium replenishes the glutathione peroxidase proteins that are the first line of defense for an oxidative injury to the lungs. Methods: Forty patients with ARDS were randomized into two groups: the SEL+ group being administered sodium selenite and the SEL- group receiving normal …	[Mahmoodpoor, Ata; Shadvar, Kamran; Ostadi, Zohreh; Saghaleini, Seied Hadi] Tabriz Univ Med Sci, Dept Anesthesiol & Crit Care Med, Tabriz, Iran; [Hamishehkar, Hadi] Tabriz Univ Med Sci, Dept Clin Pharm, Tabriz, Iran; [Sanaie, Sarvin] Tabriz Univ Med Sci, TB & Lung Dis Res Ctr, Tabriz, Iran; [Nader, Nader D.] SUNY Buffalo, Dept Anesthesiol, Buffalo, NY USA	Tabriz University of Medical Science; Tabriz University of Medical Science; Tabriz University of Medical Science; State University of New York (SUNY) System; University at Buffalo, SUNY	Nader, ND (corresponding author), 77 Goodell St,Suite 550, Buffalo, NY 14203 USA.	nnader@buffalo.edu	mahmoodpoor, Ata/AAD-6597-2021; Nader, Nader/E-6358-2014; Sanaie, Sarvin/I-3769-2016; Shadvar, kamran/ABH-8392-2020; nader, nader/E-6358-2014; saghaleini, hadi/AAA-1813-2020	Nader, Nader/0000-0002-5744-7319; mahmoodpoor, Ata/0000-0002-4361-6230;					36	86	94	0	9	TAYLOR & FRANCIS INC	PHILADELPHIA	530 WALNUT STREET, STE 850, PHILADELPHIA, PA 19106 USA	0882-0139	1532-4311		IMMUNOL INVEST	Immunol. Invest.	FEB 17	2019	48	2
J	Wang, XD; Lai, RD; Su, XF; Chen, GB; Liang, ZJ				Wang, Xida; lai, RongDe; Su, Xiangfen; Chen, Guibin; Liang, Zijing			Edaravone attenuates lipopolysaccharide-induced acute respiratory distress syndrome associated early pulmonary fibrosis via amelioration of oxidative stress and transforming growth factor-β1/Smad3 signaling	BIOCHEMICAL AND BIOPHYSICAL RESEARCH COMMUNICATIONS			English	Article						Edaravone; Acute respiratory distress syndrome; Pulmonary fibrosis; Oxidative stress; Transforming growth factor-beta 1; Smad3	FREE-RADICAL SCAVENGER; ACUTE LUNG INJURY; EPITHELIAL-MESENCHYMAL TRANSITION; RATS; SURVIVORS; MODELS; MOUSE; MICE	Pulmonary fibrosis is responsible for the both short-term and long-term outcomes in patients with acute respiratory distress syndrome (ARDS). There is still no effective cure to improve prognosis. The purpose of this study was to investigate whether edaravone, a free radical scavenger, have anti-fibrosis effects in the rat model of ARDS associated early pulmonary fibrosis by lipopolysaccharide (L…	[Wang, Xida; lai, RongDe; Su, Xiangfen; Chen, Guibin; Liang, Zijing] Guangzhou Med Univ, Affiliated Hosp 1, Dept Emergency, 151 Yanjiang Rd, Guangzhou 510120, Guangdong, Peoples R China	Guangzhou Medical University	Liang, ZJ (corresponding author), Guangzhou Med Univ, Affiliated Hosp 1, Dept Emergency, 151 Yanjiang Rd, Guangzhou 510120, Guangdong, Peoples R China.	13719337897@163.com		Wang, Xida/0000-0002-1652-5771	Medical Science and Technology Research Foundation of Guangdong Province, China [2016111225753508]	Medical Science and Technology Research Foundation of Guangdong Province, China	We would like to thank Baoxin Yang, Hongsheng Chen and Ziyao Mo (The National Center for Respiratory Diseases, State Key Laboratory of Respiratory Disease, Guangzhou Institute of Respiratory Diseases, the First Affiliated Hospital) for their assistance with qPCR, western blot and the relevant regents. This work was supported by grants from Medical Science and Technology Research Foundation of Gua…		36	15	19	0	21	ACADEMIC PRESS INC ELSEVIER SCIENCE	SAN DIEGO	525 B ST, STE 1900, SAN DIEGO, CA 92101-4495 USA	0006-291X	1090-2104		BIOCHEM BIOPH RES CO	Biochem. Biophys. Res. Commun.	JAN 1	2018	495	1
J	Feng, D; Zhou, HP; Jin, XH; Wei, J; Zhang, QQ; Gu, Y; Zhang, PC; Yang, H; Song, JG; Shi, X; Lv, X				Feng, Di; Zhou, Huanping; Jin, Xiaohong; Wei, Juan; Zhang, Qingqing; Gu, Yang; Zhang, Pengcheng; Yang, Hao; Song, Jiangang; Shi, Xuan; Lv, Xin			Electroacupuncture Pretreatment Alleviates LPS-Induced Acute Respiratory Distress Syndrome via Regulating the PPAR Gamma/NF-Kappa B Signaling Pathway	EVIDENCE-BASED COMPLEMENTARY AND ALTERNATIVE MEDICINE			English	Article							ACUTE LUNG INJURY; ACTIVATED RECEPTOR-GAMMA; GENE-EXPRESSION; CELL-DEATH; INHIBITION; RATS; ACUPUNCTURE; MACROPHAGES; APOPTOSIS; PROTECTS	Electroacupuncture (EA) is reported to possess anti-inflammatory properties and has beneficial effects on acute respiratory distress syndrome (ARDS). However, the underlying mechanisms of the effects of EA on ARDS remain unclear. This study aims to investigate the protective effect of EA on LPS-induced ARDS. In this study, Sprague-Dawley male rats were treated with EA at Hegu (LI4) for 45 minutes…	[Feng, Di; Zhou, Huanping; Wei, Juan; Zhang, Qingqing; Gu, Yang; Yang, Hao; Shi, Xuan; Lv, Xin] Tongji Univ, Shanghai Pulm Hosp, Dept Anesthesiol, Sch Med, Shanghai 200433, Peoples R China; [Jin, Xiaohong] Nanchang Univ, Dept Anesthesiol, Affiliated Hosp 2, Nanchang 330006, Jiangxi, Peoples R China; [Zhang, Pengcheng] Anhui Med Univ, Dept Anesthesiol, Hosp 1, Hefei 230022, Peoples R China; [Song,…	Tongji University; Nanchang University; Anhui Medical University; Shanghai University of Traditional Chinese Medicine	Shi, X; Lv, X (corresponding author), Tongji Univ, Shanghai Pulm Hosp, Dept Anesthesiol, Sch Med, Shanghai 200433, Peoples R China.	shixuan016@163.com; xinlvg@126.com	zhang, qingqing/GXF-2381-2022; zhou, huanping/GXA-1941-2022; Lv, Xin/L-2274-2019; Gu, Yang/KLB-9348-2024; Zhang, Pengcheng/NEU-5558-2025	shi, xuan/0000-0002-5525-3561;	National Natural Science Foundation of China [81671947, 81272142]; Shanghai Pulmonary Hospital	National Natural Science Foundation of China(National Natural Science Foundation of China (NSFC)); Shanghai Pulmonary Hospital	This work was supported by grants from the National Natural Science Foundation of China (81671947 and 81272142) and grants from Shanghai Pulmonary Hospital, 2019, Development Fund of Anesthesiology.		41	13	21	2	10	HINDAWI LTD	LONDON	ADAM HOUSE, 3RD FLR, 1 FITZROY SQ, LONDON, W1T 5HF, ENGLAND	1741-427X	1741-4288		EVID-BASED COMPL ALT	Evid.-based Complement Altern. Med.	JUL 23	2020	2020
J	Audi, SH; Jacobs, ER; Taheri, P; Ganesh, S; Clough, A				Audi, Said H.; Jacobs, Elizabeth R.; Taheri, Pardis; Ganesh, Swetha; Clough, Anne, V			ASSESSMENT OF PROTECTION OFFERED BY THE NRF2 PATHWAY AGAINST HYPEROXIA-INDUCED ACUTE LUNG INJURY IN NRF2 KNOCKOUT RATS	SHOCK			English	Article						Acute Respiratory Distress Syndrome (ARDS); Glutathione (GSH); Hexamethylpropyleneamine oxime (HMPAO); Intetleukin-1 beta (IL-1 beta); lung microvascular permeability; myeloperoxidase (MPO); Single Photon Emission Computed Tomography (SPECT)	RESPIRATORY-DISTRESS-SYNDROME; TC-99M-HEXAMETHYLPROPYLENEAMINE OXIME; COENZYME Q(1); ENDOTHELIAL-CELLS; COMPLEX-I; MECHANISMS; MODEL; BIOENERGETICS; MITOCHONDRIA; INFLAMMATION	Nuclear factor erythroid 2-related factor (Nrf2) is a redox-sensitive transcription factor that responds to oxidative stress by activating expressions of key antioxidant and cytoprotective enzymes via the Nrf2-antioxidant response element (ARE) signaling pathway. Our objective was to characterize hyperoxia-induced acute lung injury (HALI) in Nrf2 knock-out (KO) rats to elucidate the role of this …	[Audi, Said H.; Jacobs, Elizabeth R.; Taheri, Pardis; Ganesh, Swetha] Marquette Univ, Med Coll Wisconsin, Dept Biomed Engn, Milwaukee, WI 53233 USA; [Audi, Said H.; Taheri, Pardis; Ganesh, Swetha; Clough, Anne, V] Clement J Zablocki VA Med Ctr, Milwaukee, WI USA; [Jacobs, Elizabeth R.] Med Coll Wisconsin, Div Pulm & Crit Care Med, Milwaukee, WI 53226 USA; [Clough, Anne, V] Marquette Univ, Dept Ma…	Medical College of Wisconsin; Marquette University; Medical College of Wisconsin; Marquette University	Audi, SH (corresponding author), Zablocki VA Med Ctr, Res Serv 151, 5000 W Natl Ave, Milwaukee, WI 53233 USA.	said.audi@marquette.edu			NIH [2R15HL129209-02]; VA Merit Review Award [BX001681]	NIH(United States Department of Health & Human ServicesNational Institutes of Health (NIH) - USA); VA Merit Review Award(US Department of Veterans Affairs)	This work was supported by NIH 2R15HL129209-02 (Audi, Clough, Jacobs) and VA Merit Review Award BX001681 (Jacobs, Audi, Clough).		50	13	13	1	2	LIPPINCOTT WILLIAMS & WILKINS	PHILADELPHIA	TWO COMMERCE SQ, 2001 MARKET ST, PHILADELPHIA, PA 19103 USA	1073-2322	1540-0514		SHOCK	Shock	FEB	2022	57	2
J	Pan, P; Chen, J; Liu, XD; Fan, JP; Zhang, D; Zhao, WG; Xie, LX; Su, LX				Pan, Pan; Chen, Jie; Liu, Xudong; Fan, Junping; Zhang, Dong; Zhao, Weiguo; Xie, Lixin; Su, Longxiang			FUNDC1 Regulates Autophagy by Inhibiting ROS-NLRP3 Signaling to Avoid Apoptosis in the Lung in a Lipopolysaccharide-Induced Mouse Model	SHOCK			English	Article						Autophagy; FUNDC1; inflammasome; lung injury; mitochondrial ROS	INJURY; INFLAMMATION; MITOPHAGY; BARRIER; CELLS; MTOR	The incidence and mortality of acute respiratory distress syndrome (ARDS) are high, but the relevant mechanism for this disorder remains unclear. Autophagy plays an important role in the development of ARDS. The mitochondrial outer membrane protein FUNDC1 is involved in hypoxia-mediated mitochondrial autophagy, which may contribute to ARDS development. This study explored whether FUNDC1 regulates…	[Pan, Pan; Zhao, Weiguo; Xie, Lixin] Chinese Peoples Liberat Army Gen Hosp, Coll Pulm & Crit Care Med, Beijing, Peoples R China; [Chen, Jie] Cent South Univ, Xiangya Hosp, Dept Resp Med, Changsha, Hunan, Peoples R China; [Liu, Xudong; Zhang, Dong] Chinese Acad Med Sci, Peking Union Med Coll Hosp, Peking Union Med Coll, Med Sci Res Ctr,State Key Lab Complex Severe & Ra, Beijing, Peoples R China; […	Chinese People's Liberation Army General Hospital; Central South University; Chinese Academy of Medical Sciences - Peking Union Medical College; Peking Union Medical College Hospital; Peking Union Medical College; Chinese Academy of Medical Sciences - Peking Union Medical College; Peking Union Medical College Hospital; Peking Union Medical College; Chinese Academy of Medical Sciences - Peking Uni…	Su, LX (corresponding author), Chinese Acad Med Sci & Peking Union Med Coll, Peking Union Med Coll Hosp, Dept Crit Care Med, State Key Lab Complex Severe & Rare Dis, Beijing 100730, Peoples R China.;Xie, LX (corresponding author), Chinese Peoples Liberat Army Gen Hosp, Ctr Pulm & Crit Care Med, 17th Heishanhu Rd, Beijing 100853, Peoples R China.	xielx301@126.com; sulongxiang@vip.163.com	Zhao, Weiguo/AGX-7035-2022; Pan, Pan/AAG-9150-2021; Su, Longxiang/I-6788-2019	Liu, Xudong/0000-0002-6893-8842; jie, Chen/0000-0002-2852-3618;	National Science Foundation for Young Scientists of China [81901935]; China Postdoctoral Science Foundation [2021T140794]; Beijing Nova Program from Beijing Municipal Science & Technology Commission [Z201100006820126]; Beijing Municipal Natural Science Foundation [19G11368]	National Science Foundation for Young Scientists of China; China Postdoctoral Science Foundation(China Postdoctoral Science Foundation); Beijing Nova Program from Beijing Municipal Science & Technology Commission; Beijing Municipal Natural Science Foundation(Beijing Natural Science Foundation)	This research was supported by the National Science Foundation for Young Scientists of China (Grant No. 81901935) and China Postdoctoral Science Foundation special funded project (NO. 2021T140794), Beijing Nova Program from Beijing Municipal Science & Technology Commission (Grant No. Z201100006820126), and Beijing Municipal Natural Science Foundation (Grant No. 19G11368).		34	12	13	0	21	LIPPINCOTT WILLIAMS & WILKINS	PHILADELPHIA	TWO COMMERCE SQ, 2001 MARKET ST, PHILADELPHIA, PA 19103 USA	1073-2322	1540-0514		SHOCK	Shock	NOV	2021	56	5
J	Moreno-Solís, G; dela Torre-Aguilar, MJ; Torres-Borrego, J; Llorente-Cantarero, FJ; Fernández-Gutiérrez, F; Gil-Campos, M; Túnez-Fiñana, I; Pérez-Navero, JL				Moreno-Solis, Gloria; Jose dela Torre-Aguilar, Maria; Torres-Borrego, Javier; Jesus Llorente-Cantarero, Francisco; Fernandez-Gutierrez, Fernando; Gil-Campos, Mercedes; Tunez-Finana, Isaac; Luis Perez-Navero, Juan			Oxidative stress and inflamatory plasma biomarkers in respiratory syncytial virus bronchiolitis	CLINICAL RESPIRATORY JOURNAL			English	Article						Interleukins; oxidative stress; bronchiolitis; respiratory syncytial virus	ANTIOXIDATIVE STATUS; GLUTATHIONE; CHILDREN; ASTHMA; INFLAMMATION; IMBALANCE; INFECTION; ASSAY; ARDS	IntroductionOxidative stress (OS) plays a crucial role in the pathogenesis of inflammatory lung diseases. Objectives(i) We determined whether acute bronchiolitis (AB) caused by respiratory syncytial virus (RSV) induced OS; (ii) assessed whether OS biomarkers correlated with the severity of RSV-AB; and (iii) studied whether the levels of interleukins are associated with OS biomarkers. MethodsWe pe…	[Moreno-Solis, Gloria; Torres-Borrego, Javier] Reina Sofia Univ Hosp, Dept Paediat, Paediat Pulmonol & Allergy Unit, Cordoba, Spain; [Jose dela Torre-Aguilar, Maria; Jesus Llorente-Cantarero, Francisco; Gil-Campos, Mercedes; Tunez-Finana, Isaac; Luis Perez-Navero, Juan] Univ Cordoba, Maimonides Inst Biomed Res Cordoba IMIBIC, Fac Med, Cordoba, Spain; [Fernandez-Gutierrez, Fernando; Gil-Campos, Me…	Universidad de Cordoba	Pérez-Navero, JL (corresponding author), Reina Sofia Univ Hosp, Dept Paediat, Avda Menendez Pidal S-N, Cordoba 14004, Spain.	ucip.hrs.sspa@juntadeandalucia.es	de la Torre-Aguilar, Maria Jose/MIP-1205-2025	Gil-Campos, Mercedes/0000-0002-9007-0242; Torres-Borrego, Javier/0000-0003-2393-081X; Llorente-Cantarero, Francisco Jesus/0000-0003-0018-2011					41	28	31	0	14	WILEY	HOBOKEN	111 RIVER ST, HOBOKEN 07030-5774, NJ USA	1752-6981	1752-699X		CLIN RESPIR J	Clin. Respir. J.	NOV	2017	11	6
J	Zhou, RP; Chen, Y; Wei, X; Yu, B; Xiong, ZG; Lu, C; Hu, W				Zhou, Ren-Peng; Chen, Yong; Wei, Xin; Yu, Bin; Xiong, Zhi-Gang; Lu, Chao; Hu, Wei			Novel insights into ferroptosis: Implications for age-related diseases	THERANOSTICS			English	Review						age-related diseases; ferroptosis; lipid peroxidation; iron; reactive oxygen species	GLUTATHIONE-PEROXIDASE 4; SERUM FERRITIN LEVELS; CELL-DEATH; OXIDATIVE STRESS; LIPID-PEROXIDATION; IRON HOMEOSTASIS; HUNTINGTONS-DISEASE; MULTIPLE-SCLEROSIS; BRAIN IRON; QUANTITATIVE ASSESSMENT	Rapid increase in aging populations is an urgent problem because older adults are more likely to suffer from disabilities and age-related diseases (ARDs), burdening healthcare systems and society in general. ARDs are characterized by the progressive deterioration of tissues and organs over time, eventually leading to tissue and organ failure. To date, there are no effective interventions to preve…	[Zhou, Ren-Peng; Chen, Yong; Wei, Xin; Yu, Bin; Lu, Chao; Hu, Wei] Anhui Med Univ, Dept Clin Pharmacol, Hosp 2, Hefei 230601, Peoples R China; [Zhou, Ren-Peng; Xiong, Zhi-Gang] Morehouse Sch Med, Dept Neurobiol, Atlanta, GA 30310 USA	Anhui Medical University; Morehouse School of Medicine	Hu, W (corresponding author), Anhui Med Univ, Dept Clin Pharmacol, Hosp 2, Hefei 230601, Peoples R China.	huwei@ahmu.edu.cn	; Chen, Yong/KCL-3767-2024	Zhou, Renpeng/0000-0003-2629-0256; Chen, Yong/0000-0002-3520-1991	National Natural Science Foundation of China [81902182]; Natural Science Foundation of Anhui Province [1908085QH317]; National Natural Science Foundation Incubation Program of The Second Hospital of Anhui Medical University [2019GMFY03]	National Natural Science Foundation of China(National Natural Science Foundation of China (NSFC)); Natural Science Foundation of Anhui Province(Natural Science Foundation of Anhui Province); National Natural Science Foundation Incubation Program of The Second Hospital of Anhui Medical University	This project was supported by the National Natural Science Foundation of China under grant 81902182, the Natural Science Foundation of Anhui Province under grant 1908085QH317, and the National Natural Science Foundation Incubation Program of The Second Hospital of Anhui Medical University under grant 2019GMFY03.		243	98	119	3	41	IVYSPRING INT PUBL	LAKE HAVEN	PO BOX 4546, LAKE HAVEN, NSW 2263, AUSTRALIA	1838-7640			THERANOSTICS	Theranostics		2020	10	26
J	Manzanares, W; Moreira, E; Hardy, G				Manzanares, William; Moreira, Eduardo; Hardy, Gil			Pharmaconutrition revisited for critically ill patients with coronavirus disease 2019 (COVID-19): Does selenium have a place?	NUTRITION			English	Article						Selenium; Pharmaconutrition; COVID-19; Critical care	GLUTATHIONE-PEROXIDASE; INTRAVENOUS SELENIUM; SERUM SELENIUM; SEPTIC SHOCK; SEPSIS; MORTALITY; THERAPY; SUPPLEMENTATION; METABOLISM; BIOMARKERS	Coronavirus disease 2019 (COVID-19) is a global pandemic causing one of the biggest challenges for critical care medicine. Mortality from COVID-19 is much greater in elderly men, many of whom succumb to acute respiratory distress syndrome (ARDS) triggered by the viral infection. Because there is no specific antiviral treatment against COVID-19, new strategies are urgently needed. Selenium is an e…	[Manzanares, William] Udelar, Hosp Clin, Dept Crit Care, Fac Med,Intens Care Unit, Montevideo, Uruguay; [Moreira, Eduardo] Hosp Maciel ASSE, Intens Care Unit, Montevideo, Uruguay; [Hardy, Gil] Ipanema Res Trust, Auckland, New Zealand	Universidad de la Republica, Uruguay	Manzanares, W (corresponding author), Udelar, Hosp Clin, Dept Crit Care, Fac Med,Intens Care Unit, Montevideo, Uruguay.	wmanzanares@adinet.com.uy		MANZANARES, WILLIAM/0000-0002-6060-0329; Moreira San Martin, Eduardo/0000-0002-2522-3230					47	16	19	0	25	ELSEVIER SCIENCE INC	NEW YORK	STE 800, 230 PARK AVE, NEW YORK, NY 10169 USA	0899-9007	1873-1244		NUTRITION	Nutrition	JAN	2021	81
J	Taher, A; Lashgari, M; Sedighi, L; Rahimi-bashar, F; Poorolajal, J; Mehrpooya, M				Taher, Abbas; Lashgari, Marjan; Sedighi, Ladan; Rahimi-bashar, Farshid; Poorolajal, Jalal; Mehrpooya, Maryam			A pilot study on intravenous N-Acetylcysteine treatment in patients with mild-to-moderate COVID19-associated acute respiratory distress syndrome	PHARMACOLOGICAL REPORTS			English	Article						COVID-19; N-Acetylcysteine; Acute respiratory distress syndrome; Inflammation; Oxidative stress	CYSTEINE NAC; ACETYL CYSTEINE; CYTOKINE STORM; DOUBLE-BLIND; COVID-19; ANTIOXIDANT; GLUTATHIONE; IMPROVEMENT; MOLECULES; INFECTION	Background We designed this single-centre clinical trial to assess the potential benefits of N-Acetylcysteine (NAC) in patients with COVID19-associated acute respiratory distress syndrome (ARDS). Methods Ninety-two patients with mild-to-moderate COVID19-associated ARDS were allocated to the placebo (45-cases) or NAC groups (47-cases). Besides standard-of-care treatment, the patients received eith…	[Taher, Abbas; Lashgari, Marjan; Rahimi-bashar, Farshid] Hamadan Univ Med Sci, Dept Anesthesiol & Crit Care, Hamadan, Hamadan, Iran; [Sedighi, Ladan] Shahid Beheshti Univ Med Sci, Sch Nursing & Midwifery, Dept Med & Surg Nursing, Tehran, Iran; [Poorolajal, Jalal] Hamadan Univ Med Sci, Sch Publ Hlth, Dept Epidemiol, Hamadan, Hamadan, Iran; [Mehrpooya, Maryam] Hamadan Univ Med Sci, Sch Pharm, Dept …	Hamadan University of Medical Sciences; Shahid Beheshti University Medical Sciences; Hamadan University of Medical Sciences; Hamadan University of Medical Sciences	Mehrpooya, M (corresponding author), Hamadan Univ Med Sci, Sch Pharm, Dept Clin Pharm, Shahid Fahmideh Ave, Hamadan 6517838678, Hamadan, Iran.	t_anesthesia@yahoo.com; marjan0084@gmail.com; l.sedighie@yahoo.com; fr_rahimibashar@yahoo.com; poorolajal@yahoo.com; m_mehrpooya2003@yahoo.com	rahimibashar, farshia/I-6582-2017; Mehrpooya, Maryam/I-5687-2017; Poorolajal, Jalal/D-3506-2013; TAHER, ABBAS/JXN-7005-2024; Lashgari, Marjan/AEN-4632-2022		Hamadan University of Medical Sciences, Hamadan, Iran [9903271878]	Hamadan University of Medical Sciences, Hamadan, Iran(Golestan University of Medical SciencesRafsanjan University of Medical SciencesHamadan University of Medical Sciences)	This research was supported by funding from the vice-chancellor for research and technology, Hamadan University of Medical Sciences, Hamadan, Iran (No: 9903271878). This grant was not assigned to the manuscript writing, editing, and publication fee.		54	40	45	0	9	SPRINGER HEIDELBERG	HEIDELBERG	TIERGARTENSTRASSE 17, D-69121 HEIDELBERG, GERMANY	1734-1140	2299-5684		PHARMACOL REP	Pharmacol. Rep.	DEC	2021	73	6
J	Gour, A; Dogra, A; Verma, MK; Bhardwaj, M; Kour, D; Jamwal, A; Gorain, B; Kumar, M; Vij, B; Kumar, A; Nandi, U				Gour, Abhishek; Dogra, Ashish; Verma, Mahendra K.; Bhardwaj, Mahir; Kour, Dilpreet; Jamwal, Ashiya; Gorain, Bapi; Kumar, Mukesh; Vij, Bhavna; Kumar, Ajay; Nandi, Utpal			Ayurveda-based phytochemical composition attenuates lung inflammation and precipitates pharmacokinetic interaction with favipiravir: an in vivo investigation using disease-state of acute lung injury	NATURAL PRODUCT RESEARCH			English	Article						Acute lung injury; phytotherapy; lung protection; favipiravir; immunity booster; pharmacokinetic interaction	INHIBITOR	Acute respiratory distress syndrome (ARDS) is a critical form of acute lung injury (ALI). Here, we investigated the effect of a defined combination of ten pure phytochemicals in equal proportions of weight (NPM) from plants, recommended by Ayurveda for any protective action against lipopolysaccharide (LPS)-induced ALI. Results indicate that NPM markedly improved protein and neutrophil contents, m…	[Gour, Abhishek; Dogra, Ashish; Bhardwaj, Mahir; Kour, Dilpreet; Jamwal, Ashiya; Kumar, Ajay; Nandi, Utpal] CSIR Indian Inst Integrat Med, PK PD Toxicol PPT Div, Jammu 180001, India; [Gour, Abhishek; Dogra, Ashish; Bhardwaj, Mahir; Kour, Dilpreet; Jamwal, Ashiya; Vij, Bhavna; Kumar, Ajay; Nandi, Utpal] Acad Sci & Innovat Res AcSIR, Ghaziabad 201002, India; [Verma, Mahendra K.; Kumar, Mukesh] CSIR…	Council of Scientific & Industrial Research (CSIR) - India; CSIR - Indian Institute of Integrative Medicine (IIIM); Academy of Scientific & Innovative Research (AcSIR); Council of Scientific & Industrial Research (CSIR) - India; CSIR - Indian Institute of Integrative Medicine (IIIM); Birla Institute of Technology Mesra	Nandi, U (corresponding author), CSIR Indian Inst Integrat Med, PK PD Toxicol PPT Div, Jammu 180001, India.;Nandi, U (corresponding author), Acad Sci & Innovat Res AcSIR, Ghaziabad 201002, India.	utpal.nandi@iiim.res.in	Dogra, Ashish/AAJ-7671-2021; Gorain, Bapi/M-9706-2017; Kour, Dilpreet/KCY-3956-2024; Gour, Abhishek/AAJ-7549-2021; Verma, Mahendra/G-5258-2011; KUMAR, AJAY/ABC-6109-2021; Verma, M K/G-5258-2011; Kumar, Mukesh/A-1876-2011	KUMAR, AJAY/0000-0002-3889-3049; Gour, Abhishek/0000-0003-4599-0389; Verma, M K/0000-0002-9961-8382; Nandi, Dr. Utpal/0000-0002-7868-0240;					26	1	1	0	5	TAYLOR & FRANCIS LTD	ABINGDON	2-4 PARK SQUARE, MILTON PARK, ABINGDON OR14 4RN, OXON, ENGLAND	1478-6419	1478-6427		NAT PROD RES	Nat. Prod. Res.	NOV 17	2023	37	22
J	Ozatik, O; Ozatik, FY; Teksen, Y; Dag, L; Saygili, S; Koçak, A				Ozatik, Orhan; Ozatik, Fikriye Yasemin; Teksen, Yasemin; Dag, Llknur; Saygili, Suna; Kocak, Ahmet			Research Into the Effect of Proton Pump Inhibitors on Lungs and Leukocytes	TURKISH JOURNAL OF GASTROENTEROLOGY			English	Article						ARDS; H2 receptors blockers; immune deficiency; lung; proton pump inhibitors	PANTOPRAZOLE	Background: Proton pump inhibitors (PPI) are the most commonly used medication in the world. They are prescribed as an effective treatment choice for gastrointestinal system diseases linked to hyperacidity, especially. Additionally, non-indication and unnecessary use are very common. Many publications in recent times have reported significant side effects. However, there are insufficient studies …	[Ozatik, Orhan; Saygili, Suna; Kocak, Ahmet] Kutahya Hlth Sci Univ, Fac Med, Dept Histol & Embriol, Kutahya, Turkey; [Ozatik, Fikriye Yasemin; Teksen, Yasemin] Kutahya Hlth Sci Univ, Fac Med, Dept Pharmacol, Kutahya, Turkey; [Dag, Llknur] Eskisehir Osmangazi Univ, Applicat & Res Ctr, Cent Res Lab, Eskisehir, Turkey	Kutahya Health Sciences University; Kutahya Health Sciences University; Eskisehir Osmangazi University	Ozatik, O (corresponding author), Kutahya Hlth Sci Univ, Fac Med, Dept Histol & Embriol, Kutahya, Turkey.	orhanozatik@yahoo.com	; Özatik, Fikriye Yasemin/GQQ-1778-2022; karadeniz saygılı, suna/ABB-1591-2021; Ozatik, Orhan/GXA-2381-2022; Teksen, Yasemin/JXY-1169-2024; Tekşen, Yasemin/JXY-1169-2024	Ozatik, Fikriye Yasemin/0000-0002-8422-2975; Ozatik, Orhan/0000-0002-4662-6493; Teksen, Yasemin/0000-0002-7224-3621; Karadeniz Saygili, Suna/0000-0003-1704-3720; KOCAK, AHMET/0000-0002-2487-2431;	Dumlupinar University Scientific Research Projects Coordinatorship [2018-13]; Kutahya Health Sciences University Scientific Research Projects Coordinatorship [TSA-2020-6]	Dumlupinar University Scientific Research Projects Coordinatorship(Dumlupinar University); Kutahya Health Sciences University Scientific Research Projects Coordinatorship	This work was supported by 2 grants from the Dumlupinar University Scientific Research Projects Coordinatorship (Grant No: 2018-13) and Kutahya Health Sciences University Scientific Research Projects Coordinatorship (Grant No: TSA-2020-6).		16	1	1	0	4	AVES	SISLI	BUYUKDERE CAD 105-9, MECIDIYEKOY, SISLI, ISTANBUL 34394, TURKEY		2148-5607		TURK J GASTROENTEROL	Turk. J. Gastroenterol.	DEC	2021	32	12
J	Oliveira, GP; de Abreu, MG; Pelosi, P; Rocco, PRM				Oliveira, Gisele P.; de Abreu, Marcelo Gama; Pelosi, Paolo; Rocco, Patricia R. M.			Exogenous Glutamine in Respiratory Diseases: Myth or Reality?	NUTRIENTS			English	Review						glutamine; cystic fibrosis; asthma; chronic obstructive pulmonary disease; acute respiratory distress syndrome; lung cancer	CYTOSOLIC PHOSPHOLIPASE A(2); ACUTE LUNG INJURY; AMINO-ACIDS; GLUTATHIONE LEVELS; DISTRESS-SYNDROME; SKELETAL-MUSCLE; GROWTH-HORMONE; PULMONARY; METABOLISM; ASTHMA	Several respiratory diseases feature increased inflammatory response and catabolic activity, which are associated with glutamine depletion; thus, the benefits of exogenous glutamine administration have been evaluated in clinical trials and models of different respiratory diseases. Recent reviews and meta-analyses have focused on the effects and mechanisms of action of glutamine in a general popul…	[Oliveira, Gisele P.; Rocco, Patricia R. M.] Univ Fed Rio de Janeiro, Ctr Ciencias Saude, Carlos Chagas Filho Inst Biophys, Lab Pulm Invest, Av Carlos Chagas Filho 373,Bloco G-014, BR-21941902 Rio De Janeiro, RJ, Brazil; [de Abreu, Marcelo Gama] Tech Univ Dresden, Pulm Engn Grp, Univ Hosp Carl Gustav Carus, Dept Anesthesiol & Intens Care Therapy, Fetscherstr 74, D-01307 Dresden, Germany; [Pelosi,…	Universidade Federal do Rio de Janeiro; Technische Universitat Dresden; Carl Gustav Carus University Hospital; University of Genoa	Rocco, PRM (corresponding author), Univ Fed Rio de Janeiro, Ctr Ciencias Saude, Carlos Chagas Filho Inst Biophys, Lab Pulm Invest, Av Carlos Chagas Filho 373,Bloco G-014, BR-21941902 Rio De Janeiro, RJ, Brazil.	giselepoliv@gmail.com; mgabreu@uniklinikum-dresden.de; ppelosi@hotmail.com; prmrocco@biof.ufrj.br	; Rocco, Patricia/I-7460-2012	Rieken Macedo Rocco, Patricia/0000-0003-1412-7136; Pelosi, Paolo/0000-0001-5055-3023					85	36	46	2	15	MDPI	BASEL	ST ALBAN-ANLAGE 66, CH-4052 BASEL, SWITZERLAND	2072-6643			NUTRIENTS	Nutrients	FEB	2016	8	2
J	Dong, X; Li, DD; Fang, ZY; Zhang, CY; Wang, J; Wan, XY				Dong, Xue; Li, Dandan; Fang, Zhiyao; Zhang, Chenyang; Wang, Jia; Wan, Xianyao			Astaxanthin alleviates lipopolysaccharide-induced acute lung injury by suppressing ferroptosis	FOOD & FUNCTION			English	Article							IRON HOMEOSTASIS; AUTOPHAGY; NCOA4; FERRITINOPHAGY; CELLS	Background: Acute lung injury (ALI) and acute respiratory distress syndrome (ARDS) are life-threatening disorders with a high risk of mortality. Astaxanthin (AST) is a supernatural antioxidant that has been extensively studied due to its role in immunomodulation, oxidative stress, and lipid peroxidation. However, the association between ferroptosis and AST is not well understood. The purpose of t…	[Dong, Xue; Li, Dandan; Fang, Zhiyao; Zhang, Chenyang; Wang, Jia; Wan, Xianyao] Dalian Med Univ, Dept Crit Care Med, Affiliated Hosp 1, Dalian 116021, Peoples R China	Dalian Medical University	Wang, J; Wan, XY (corresponding author), Dalian Med Univ, Dept Crit Care Med, Affiliated Hosp 1, Dalian 116021, Peoples R China.	emily.jia.1987@163.com; 13322210199@163.com	; Dong, Xue/O-9656-2019	Wang, Jia/0000-0003-1603-7361;					39	21	24	7	32	ROYAL SOC CHEMISTRY	CAMBRIDGE	THOMAS GRAHAM HOUSE, SCIENCE PARK, MILTON RD, CAMBRIDGE CB4 0WF, CAMBS, ENGLAND	2042-6496	2042-650X		FOOD FUNCT	Food Funct.	JUL 3	2023	14	13
J	Balieira, KVB; Mazzo, M; Bizerra, PFV; Guimares, ARDS; Nicodemo, D; Mingatto, FE				Boas Balieira, Kamila Vilas; Mazzo, Meiriele; Veiga Bizerra, Paulo Francisco; de Jesus Santos Guimares, Anilda Rufino; Nicodemo, Daniel; Mingatto, Fabio Erminio			Imidacloprid-induced oxidative stress in honey bees and the antioxidant action of caffeine	APIDOLOGIE			English	Article						Beekeeping; Insecticide; Lipid peroxidation; Neonicotinoids; Oxidative stress; Toxic effects	LIPID-PEROXIDATION; PESTICIDES; TOXICITY; NEONICOTINOIDS; INSECTICIDES; GLUTATHIONE; EXPOSURE; ENZYMES; SYSTEM; POLLINATORS	The use of pesticides on crops contributes to the decline of bee populations, and in this sense, bioactive nutrients have been studied to counteract this effect. We suppose that caffeine might be one of these nutrients. We exposed honey bees (Apis mellifera L.) to 0.7 or 2.0 ng/mL imidacloprid, 5.0 mu g/mL caffeine in syrup, or 5.0 mu g/mL caffeine in syrup plus 0.7 or 2.0 ng/mL imidacloprid. Aft…	[Boas Balieira, Kamila Vilas; Mazzo, Meiriele; Veiga Bizerra, Paulo Francisco; de Jesus Santos Guimares, Anilda Rufino; Nicodemo, Daniel; Mingatto, Fabio Erminio] Sao Paulo State Univ Unesp, Coll Agr & Technol Sci, Dracena, SP, Brazil	Universidade Estadual Paulista	Mingatto, FE (corresponding author), Sao Paulo State Univ Unesp, Coll Agr & Technol Sci, Dracena, SP, Brazil.	fabio.mingatto@unesp.br	; Bizerra, Paulo Francisco/JFT-1923-2023; Nicodemo, Daniel/F-9572-2012; Mingatto, Fábio/F-5984-2011	Veiga Bizerra, Paulo Francisco/0000-0002-4264-4854; Nicodemo, Daniel/0000-0001-6594-5791; Mingatto, Fabio Erminio/0000-0003-3488-1814;					62	61	69	0	52	SPRINGER FRANCE	PARIS	22 RUE DE PALESTRO, PARIS, 75002, FRANCE	0044-8435	1297-9678		APIDOLOGIE	Apidologie	OCT	2018	49	5
J	Jovandaric, MZ; Dokic, M; Babovic, IR; Milicevic, S; Dotlic, J; Milosevic, B; Culjic, M; Andric, L; Dimic, N; Mitrovic, O; Beleslin, A; Nikolic, J; Jestrovic, Z; Babic, S				Jovandaric, Miljana Z. Z.; Dokic, Milan; Babovic, Ivana R. R.; Milicevic, Srboljub; Dotlic, Jelena; Milosevic, Branislav; Culjic, Miljan; Andric, Luka; Dimic, Nemanja; Mitrovic, Olga; Beleslin, Aleksandra; Nikolic, Jovana; Jestrovic, Zorica; Babic, Sandra			The Significance of COVID-19 Diseases in Lipid Metabolism Pregnancy Women and Newborns	INTERNATIONAL JOURNAL OF MOLECULAR SCIENCES			English	Review						COVID-19; pregnancy; newborn; lipid peroxidation	ADIPOSE-TISSUE; MITOCHONDRIA	Coronavirus disease (COVID-19) is an infectious disease caused by SARS-CoV-2. Elderly people, people with immunodeficiency, autoimmune and malignant diseases, as well as people with chronic diseases have a higher risk of developing more severe forms of the disease. Pregnant women and children can becomesick, although more often they are only the carriers of the virus. Recent studies have indicate…	[Jovandaric, Miljana Z. Z.] Univ Clin Ctr Serbia, Dept Neonatol, Clin Gynecol & Obstet, Belgrade 11000, Serbia; [Dokic, Milan; Babovic, Ivana R. R.; Milicevic, Srboljub; Dotlic, Jelena; Milosevic, Branislav; Culjic, Miljan; Andric, Luka; Mitrovic, Olga; Beleslin, Aleksandra; Nikolic, Jovana; Jestrovic, Zorica; Babic, Sandra] Univ Clin Ctr Serbia, Dept Gynecol & Obstet, Clin Gynecol & Obstet, Belg…	Clinical Centre of Serbia; Clinical Centre of Serbia; University of Belgrade	Jovandaric, MZ (corresponding author), Univ Clin Ctr Serbia, Dept Neonatol, Clin Gynecol & Obstet, Belgrade 11000, Serbia.	rrebecca080@gmail.com	; Dokic, Milan/JNS-8602-2023; Babovic, Ivana/J-8976-2012; Miljana, Jovandaric/AAU-2151-2020	Babovic, Ivana/0000-0002-2291-1476; Jovandaric, Miljana/0000-0003-0294-6353; Beleslin, Aleksandra/0000-0002-2407-8975; Babic, Sandra/0000-0002-7812-9002; Dokic, Milan/0000-0002-1528-7732; Babic, Sandra/0000-0002-4003-0576; Mihaljevic, Olga/0000-0003-0991-483X; Milosevic, Branislav/0000-0002-1994-8825; Dimic, Nemanja/0000-0003-2605-1562					58	8	10	0	4	MDPI	BASEL	MDPI AG, Grosspeteranlage 5, CH-4052 BASEL, SWITZERLAND	1661-6596	1422-0067		INT J MOL SCI	Int. J. Mol. Sci.	DEC	2022	23	23
J	Lei, LH; Guo, YQ; Lin, J; Lin, XH; He, SL; Qin, ZS; Lin, Q				Lei, Lihua; Guo, Yiqing; Lin, Jun; Lin, Xiaohua; He, Shiling; Qin, Zaisheng; Lin, Qun			Inhibition of endotoxin-induced acute lung injury in rats by bone marrow-derived mesenchymal stem cells: Role of Nrf2/HO-1 signal axis in inhibition of NLRP3 activation	BIOCHEMICAL AND BIOPHYSICAL RESEARCH COMMUNICATIONS			English	Article						Lipopolysaccharide; Acute lung injury; Mesenchymal stem cells; Nuclear factor-erythroid 2 p45-related factor 2; Heme oxygenase-1; NLRP3		Both the Nuclear factor-erythroid 2 p45-related factor 2 (Nrf2)/heme oxygenase-1 (HO-1) antioxidant pathway and Nucleotide-binding oligomerization domain (NOD)-like receptor protein 3 (NLRP3) pathway are considered essential for the development of acute lung injury (ALI)/ARDS induced by sepsis. Our aim was to study the role of Nrf2/HO-1 pathway on activation of the NLRP3 in the protective effect …	[Lei, Lihua] Southern Med Univ, Nanfang Hosp, Guangzhou 510515, Guangdong, Peoples R China; [Lei, Lihua; Guo, Yiqing] Fujian Med Univ, Dept Anesthesiol, Shengli Clin Med Coll, Fuzhou 350001, Fujian, Peoples R China; [Lin, Jun; Lin, Xiaohua; He, Shiling] Fujian Med Univ, Clin Med Coll 1, Fuzhou 350005, Fujian, Peoples R China; [Qin, Zaisheng] Southern Med Univ, Nanfang Hosp, Dept Anesthesiol, 1838…	Southern Medical University - China; Fujian Medical University; Fujian Medical University; Southern Medical University - China; Fujian Medical University; Fujian Medical University	Qin, ZS (corresponding author), Southern Med Univ, Nanfang Hosp, Dept Anesthesiol, 1838 North Guangzhou Ave, Guangzhou 510515, Guangdong, Peoples R China.;Lin, Q (corresponding author), Fujian Med Univ, Affiliated Hosp 1, Fuzhou 350005, Fujian, Peoples R China.	mzkqinzs@sina.com; linqun69@fjmu.edu.cn		Lin, Jun/0000-0001-8242-367X; Guo, Yiqing/0000-0002-2586-7116; Lin, Qun/0009-0001-2310-5054	Fujian Provincial Natural Science Foundation of China [2019J0118]; Fujian Provincial medical innovation project of China [2016CX-2, 2016-CX-30]	Fujian Provincial Natural Science Foundation of China; Fujian Provincial medical innovation project of China	The work was partially supported by grants from the Fujian Provincial Natural Science Foundation of China (No. 2019J0118) and the Fujian Provincial medical innovation project of China (No. 2016CX-2 and No. 2016-CX-30).		18	17	18	0	13	ACADEMIC PRESS INC ELSEVIER SCIENCE	SAN DIEGO	525 B ST, STE 1900, SAN DIEGO, CA 92101-4495 USA	0006-291X	1090-2104		BIOCHEM BIOPH RES CO	Biochem. Biophys. Res. Commun.	APR 30	2021	551
J	Yao, PY; Zhang, Z; Cao, J				Yao, Peiyu; Zhang, Zhuo; Cao, Jie			Isorhapontigenin alleviates lipopolysaccharide-induced acute lung injury via modulating Nrf2 signaling	RESPIRATORY PHYSIOLOGY & NEUROBIOLOGY			English	Article						Acute lung injury; Isorhapontigenin; Nrf2; Oxidative stress; Inflammation	NF-KAPPA-B; RESPIRATORY-DISTRESS-SYNDROME; AIRWAY INFLAMMATION; OXIDATIVE STRESS; MAPK; INHIBITION; INDUCTION; CARE	Nuclear factor erythroid-2 related factor 2 (Nrf2) is involved in mitigating various oxidative stress- and inflammation-induced diseases, including acute lung injury/acute respiratory distress syndrome (ALI/ARDS). Isorhapontigenin (ISO), from the Chinese herb Gnetum cleistostachyum, exhibits antioxidant and antiinflammatory properties. In this study, we explored the protective effects of ISO in A…	[Yao, Peiyu; Cao, Jie] Tianjin Med Univ Gen Hosp, Dept Resp & Crit Care, Tianjin 300052, Peoples R China; [Yao, Peiyu; Zhang, Zhuo] Tianjin Union Med Ctr, Dept Emergency, Tianjin 300121, Peoples R China	Tianjin Medical University	Cao, J (corresponding author), Tianjin Med Univ Gen Hosp, Dept Resp & Crit Care, Tianjin 300052, Peoples R China.	tjcaojie@163.com	Cao, jie/JXR-6551-2024		Tianjin Union Medical Center Fund [2019YJZD003]	Tianjin Union Medical Center Fund	This work was supported by the Tianjin Union Medical Center Fund [grant number 2019YJZD003] . We sincerely appreciate the great help from Professor Shiwu Zhang, Dr Minying Zheng, and Zhengduo Yang (Department of Pathology, Tianjin Union Medical Center) for technical support.		44	17	20	0	14	ELSEVIER	AMSTERDAM	RADARWEG 29, 1043 NX AMSTERDAM, NETHERLANDS	1569-9048	1878-1519		RESP PHYSIOL NEUROBI	Respir. Physiol. Neuro.	JUL	2021	289
J	Hu, M; Yang, JL; Xu, Y				Hu, Mu; Yang, Jielai; Xu, Yang			Effect of α-tocopherol in alleviating the lipopolysaccharide-induced acute lung injury via inhibiting nuclear factor kappa-B signaling pathways	BIOENGINEERED			English	Article						alpha -tocopherol; acute lung injury; NF-kappa B signaling pathway	VITAMIN-E	Acute respiratory distress syndrome (ARDS) leads to the acute lung injury (ALI), a form of diffused alveolars injury, accompanied by severe inflammation and oxidative damage of alveolar epithelial cells. alpha-Tocopherol (alpha-TOH), one of the eight isoforms of vitamin E, is a natural antioxidant-free radical. We aimed to understand the effect of alpha-TOH and mechanism involved in inducing the …	[Hu, Mu; Yang, Jielai; Xu, Yang] Shanghai Jiao Tong Univ, Ruijin Hosp, Sch Med, Dept Orthoped, 999 Xiwang Rd, Shanghai 201801, Shanghai, Peoples R China	Shanghai Jiao Tong University	Hu, M (corresponding author), Shanghai Jiao Tong Univ, Ruijin Hosp, Sch Med, Dept Orthoped, 999 Xiwang Rd, Shanghai 201801, Shanghai, Peoples R China.	1611018@tongji.edu.cn	yang, jielai/HPG-1882-2023						26	7	10	3	23	TAYLOR & FRANCIS INC	PHILADELPHIA	530 WALNUT STREET, STE 850, PHILADELPHIA, PA 19106 USA	2165-5979	2165-5987		BIOENGINEERED	Bioengineered	FEB 1	2022	13	2
J	Lu, X; Ma, Y; He, JQ; Li, Y; Zhu, HD; Yu, XZ				Lu, Xin; Ma, Yong; He, Jianqiang; Li, Yi; Zhu, Huadong; Yu, Xuezhong			N-acetylcysteine for adults with acute respiratory distress syndrome: A meta-analysis of randomized controlled trials	HONG KONG JOURNAL OF EMERGENCY MEDICINE			English	Article						N-acetylcysteine; acute respiratory distress syndrome; systematic review; meta-analysis	DOUBLE-BLIND; GLUTATHIONE; ACTIVATION; OUTCOMES; ARDS	Background: Acute respiratory distress syndrome is regarded as a formidable clinical challenge due to its high prevalence and mortality. The treatment of acute respiratory distress syndrome is very complex and difficult. As an adjuvant therapy, the antioxidant N-acetylcysteine has been investigated for several years but the benefit is controversial. Objectives: We performed the systematic review …	[Lu, Xin; Ma, Yong; He, Jianqiang; Li, Yi; Zhu, Huadong; Yu, Xuezhong] Chinese Acad Med Sci, Dept Emergency, Peking Union Med Coll Hosp, Peking Union Med Coll, Beijing 100730, Peoples R China	Chinese Academy of Medical Sciences - Peking Union Medical College; Peking Union Medical College; Peking Union Medical College Hospital	Li, Y; Yu, XZ (corresponding author), Chinese Acad Med Sci, Dept Emergency, Peking Union Med Coll Hosp, Peking Union Med Coll, Beijing 100730, Peoples R China.	billliyi@126.com; yxz@pumch.cn		Zhu, Huadong/0000-0002-1592-3188	National Natural Science Foundation of China [81550034]	National Natural Science Foundation of China(National Natural Science Foundation of China (NSFC))	This study was supported by the National Natural Science Foundation of China through Grant No. 81550034 to Y.L.		32	17	20	0	4	SAGE PUBLICATIONS LTD	LONDON	1 OLIVERS YARD, 55 CITY ROAD, LONDON EC1Y 1SP, ENGLAND	1024-9079	2309-5407		HONG KONG J EMERG ME	Hong Kong J. Emerg. Med.	SEP	2019	26	5
J	Fini, MA; Gaydos, J; McNally, A; Karoor, V; Burnham, EL				Fini, Mehdi A.; Gaydos, Jeanette; McNally, Alicia; Karoor, Vijaya; Burnham, Ellen L.			Alcohol abuse is associated with enhanced pulmonary and systemic xanthine oxidoreductase activity	AMERICAN JOURNAL OF PHYSIOLOGY-LUNG CELLULAR AND MOLECULAR PHYSIOLOGY			English	Article						inflammasome; cyclooxygenase-2; bronchoscopy; human	RESPIRATORY-DISTRESS-SYNDROME; ACUTE LUNG INJURY; NLRP3 INFLAMMASOME ACTIVATION; URIC-ACID; OXIDATIVE STRESS; USE DISORDERS; GLUTATHIONE HOMEOSTASIS; N-ACETYLCYSTEINE; DANGER SIGNALS; CLINICAL-TRIAL	Acute respiratory distress syndrome (ARDS) is a common and devastating disorder. Alcohol use disorders (AUDs) increase ARDS risk and worsen outcomes through mechanisms that may include enhancement of pulmonary oxidative stress. Alcohol consumption increases activity of the enzyme xanthine oxidoreductase (XOR) that contributes to production of both reactive oxygen species (ROS) and uric acid, a da…	[Fini, Mehdi A.; Karoor, Vijaya] Univ Colorado, Sch Med, Cardiovasc Pulm Res Lab, Denver, CO USA; [Fini, Mehdi A.; Gaydos, Jeanette; McNally, Alicia; Karoor, Vijaya; Burnham, Ellen L.] Univ Colorado, Sch Med, Dept Med, Div Pulm Sci & Crit Care Med, Denver, CO USA	University of Colorado System; University of Colorado Anschutz Medical Campus; University of Colorado Denver; University of Colorado System; University of Colorado Anschutz Medical Campus; University of Colorado Denver	Burnham, EL (corresponding author), 12700 E 19th St,Mailstop C272, Aurora, CO 80045 USA.	ellen.burnham@ucdenver.edu		burnham, ellen/0000-0002-9945-0284	National Institutes of Health [R24AA019661, UL1TR001082]; U.S. Department of Defense [W81XWH-14-1-0451]	National Institutes of Health(United States Department of Health & Human ServicesNational Institutes of Health (NIH) - USA); U.S. Department of Defense(United States Department of Defense)	This study was funded by National Institutes of Health Grants R24AA019661 and UL1TR001082 and U.S. Department of Defense Grant W81XWH-14-1-0451.		66	5	6	0	1	AMER PHYSIOLOGICAL SOC	BETHESDA	9650 ROCKVILLE PIKE, BETHESDA, MD 20814 USA	1040-0605	1522-1504		AM J PHYSIOL-LUNG C	Am. J. Physiol.-Lung Cell. Mol. Physiol.	DEC	2017	313	6
J	Overgaard, CE; Schlingmann, B; White, SD; Ward, C; Fan, X; Swarnakar, S; Brown, LAS; Guidot, DM; Koval, M				Overgaard, Christian E.; Schlingmann, Barbara; White, StevenClaude Dorsainvil; Ward, Christina; Fan, Xian; Swarnakar, Snehasikta; Brown, Lou Ann S.; Guidot, David M.; Koval, Michael			The relative balance of GM-CSF and TGF-β1 regulates lung epithelial barrier function	AMERICAN JOURNAL OF PHYSIOLOGY-LUNG CELLULAR AND MOLECULAR PHYSIOLOGY			English	Article						granulocyte/macrophage colony-stimulating factor; lung epithelium; pulmonary edema; claudin; tight junctions	COLONY-STIMULATING FACTOR; RESPIRATORY-DISTRESS-SYNDROME; ALVEOLAR MACROPHAGE DIFFERENTIATION; CLAUDIN EXPRESSION; ALCOHOL INGESTION; GLUTATHIONE DEPLETION; ETHANOL INGESTION; LATENT TGF-BETA-1; TGF-BETA; PULMONARY	Lung barrier dysfunction is a cardinal feature of the acute respiratory distress syndrome (ARDS). Alcohol abuse, which increases the risk of ARDS two-to fourfold, induces transforming growth factor (TGF)-beta 1, which increases epithelial permeability and impairs granulocyte/macrophage colony-stimulating factor (GM-CSF)-dependent barrier integrity in experimental models. We hypothesized that the …	[Overgaard, Christian E.; Schlingmann, Barbara; White, StevenClaude Dorsainvil; Ward, Christina; Fan, Xian; Guidot, David M.; Koval, Michael] Emory Univ, Dept Med, Divis Pulm Allergy Crit Care & Sleep Med, Atlanta, GA 30322 USA; [Overgaard, Christian E.; Ward, Christina; Brown, Lou Ann S.; Guidot, David M.; Koval, Michael] Emory Univ, Emory Alcohol & Lung Biol Ctr, Atlanta, GA 30322 USA; [Koval, …	Emory University; Emory University; Emory University; Council of Scientific & Industrial Research (CSIR) - India; CSIR - Indian Institute of Chemical Biology (IICB); Emory University; US Department of Veterans Affairs; Veterans Health Administration (VHA); Atlanta VA Health Care System	Koval, M (corresponding author), 615 Michael St,Suite 205, Atlanta, GA 30322 USA.	mhkoval@emory.edu	Koval, Michael/C-6366-2015; Ward, Christopher/B-8175-2013	Koval, Michael/0000-0002-5422-5614; Swarnakar, Snehasikta/0000-0002-7139-9683	Emory Alcohol and Lung Biology Center [P50-AA013757, R01-AA017627, R01-HL083120, R01-HL116958, T32-AA-013528, R25-GM099644]; German Academic Exchange Service (DAAD); Fulbright Scholar Program; Veterans Administration through a Merit Review; Emory University Research Committee	Emory Alcohol and Lung Biology Center; German Academic Exchange Service (DAAD)(Deutscher Akademischer Austausch Dienst (DAAD)); Fulbright Scholar Program; Veterans Administration through a Merit Review; Emory University Research Committee	This work was supported by the Emory Alcohol and Lung Biology Center through P50-AA013757 (D. Guidot, L. Brown, and M. Koval), R01-AA017627 (D. Guidot), R01-HL083120 (M. Koval), R01-HL116958 (M. Koval), T32-AA-013528 (C. Overgaard), and R25-GM099644 (S. Dorsainvil White), the German Academic Exchange Service (DAAD) (B. Schlingmann), the Fulbright Scholar Program (S. Swarnakar), the Veterans Admin…		57	45	56	0	11	AMER PHYSIOLOGICAL SOC	BETHESDA	9650 ROCKVILLE PIKE, BETHESDA, MD 20814 USA	1040-0605	1522-1504		AM J PHYSIOL-LUNG C	Am. J. Physiol.-Lung Cell. Mol. Physiol.	JUN 15	2015	308	12
J	Zhang, H; Zeng, J; Li, JK; Gong, HK; Chen, ML; Li, Q; Liu, SX; Luo, SJ; Dong, HX; Xu, YK; Duan, HL; Huang, L; Lv, CZ				Zhang, Hong; Zeng, Jun; Li, Jiankang; Gong, Huankai; Chen, Meiling; Li, Quan; Liu, Shengxing; Luo, Shanjun; Dong, Huanxiang; Xu, Yingke; Duan, Huanling; Huang, Ling; Lv, Chuanzhu			Sivelestat sodium attenuates acute lung injury by inhibiting JNK/NF-κB and activating Nrf2/HO-1 signaling pathways	BIOMOLECULES AND BIOMEDICINE			English	Article						Sivelestat sodium (SIV); acute lung injury (ALI); inflammation; oxidative stress; JNK; NF-KB; Nrf2; HO-1	NEUTROPHIL ELASTASE; OXIDATIVE STRESS; INFLAMMATION; PATHOGENESIS	Sivelestat sodium (SIV), a neutrophil elastase inhibitor, is mainly used for the clinical treatment of acute respiratory distress syndrome (ARDS) or acute lung injury (ALI). However, studies investigating the effects of SIV treatment of ALI are limited. Therefore, this study investigated the potential molecular mechanism of the protective effects of SIV against ALI. Human pulmonary microvascular …	[Zhang, Hong; Li, Jiankang; Gong, Huankai; Chen, Meiling; Dong, Huanxiang; Xu, Yingke; Duan, Huanling] Hainan Med Univ, Emergency & Trauma Coll, Haikou, Hainan, Peoples R China; [Zhang, Hong; Li, Jiankang; Gong, Huankai; Chen, Meiling; Dong, Huanxiang; Xu, Yingke; Duan, Huanling; Lv, Chuanzhu] Hainan Med Univ, Key Lab Emergency & Trauma, Minist Educ, Haikou, Hainan, Peoples R China; [Zeng, Jun; L…	Hainan Medical University; Hainan Medical University; University of Electronic Science & Technology of China; Sichuan Provincial People's Hospital; Chinese Academy of Medical Sciences - Peking Union Medical College; Peking Union Medical College Hospital; Peking Union Medical College; Hainan Medical University; Army Medical University; Hainan Medical University; Hainan Medical University	Lv, CZ (corresponding author), Hainan Med Univ, Key Lab Emergency & Trauma, Minist Educ, Haikou, Hainan, Peoples R China.;Lv, CZ (corresponding author), Univ Elect Sci & Technol China, Sichuan Prov Peoples Hosp, Emergency Med Ctr, Chengdu, Sichuan, Peoples R China.;Huang, L (corresponding author), Hainan Prov Drug Adm, Hainan Pharmacopoeia Review Ctr, Haikou, Hainan, Peoples R China.;Huang, L (co…	puer6@163.com; Lvchuanzhu677@126.com	Zhang, Hong-Sheng/B-7570-2011; 曾, 珺/ISR-8874-2023; Chen, Mei Ling/IZD-5069-2023; yuzhen, gao/IAR-5454-2023; Xu, Yingke/B-5759-2008		program 2020 innovative research project for postgraduate students in Hainan Province [Hys2020-365]; technology Project of Hainan Province [821MS140]; Hainan Province Science and Technology Special Fund [ZDKJ202004, ZDKJ2021038]; National Natural Science Foundation of China [81871611]; Finance Science and Technology Program of Sichuan Province [2022YFS0602]; Key Areas Research Program of Hunan Pr…	program 2020 innovative research project for postgraduate students in Hainan Province; technology Project of Hainan Province; Hainan Province Science and Technology Special Fund; National Natural Science Foundation of China(National Natural Science Foundation of China (NSFC)); Finance Science and Technology Program of Sichuan Province; Key Areas Research Program of Hunan Province	This work was funded by the program 2020 innovative research project for postgraduate students in Hainan Province (NO. Hys2020-365) , the technology Project of Hainan Province (821MS140) , the Hainan Province Science and Technology Special Fund (ZDKJ202004, ZDKJ2021038) , the National Natural Science Foundation of China (81871611) , the Finance Science and Technology Program of Sichuan Province (…		46	18	23	1	6	ASSOC BASIC MEDICAL SCI FEDERATION BOSNIA & HERZEGOVINA SARAJEVO	CEKALUSA	UNIV SARAJEVO, MEDICAL FAC, CEKALUSA, SARAJEVO 90, BOSNIA & HERCEG	2831-0896	2831-090X		BIOMOL BIOMED	Biomol. Biomed.		2023	23	3
J	Winnersbach, P; Hosseinnejad, A; Breuer, T; Fechter, T; Jakob, F; Schwaneberg, U; Rossaint, R; Bleilevens, C; Singh, S				Winnersbach, Patrick; Hosseinnejad, Aisa; Breuer, Thomas; Fechter, Tamara; Jakob, Felix; Schwaneberg, Ulrich; Rossaint, Rolf; Bleilevens, Christian; Singh, Smriti			Endogenous Nitric Oxide-Releasing Microgel Coating Prevents Clot Formation on Oxygenator Fibers Exposed to In Vitro Blood Flow	MEMBRANES			English	Article						blood-contacting surfaces; ARDS; PMP fibers; microgel coating; platelet activation; anti-thrombogenicity; systemic anticoagulation	MEMBRANE-OXYGENATION; PLATELET ACTIVATION; THROMBOSIS; POLYMERS; SURFACE; ENDOTHELIUM; GLUTATHIONE; GENERATION; PATIENT; ROLES	Background: Clot formation on foreign surfaces of extracorporeal membrane oxygenation systems is a frequent event. Herein, we show an approach that mimics the enzymatic process of endogenous nitric oxide (NO) release on the oxygenator membrane via a biomimetic, non-fouling microgel coating to spatiotemporally inhibit the platelet (PLT) activation and improve antithrombotic properties. This study …	[Winnersbach, Patrick; Fechter, Tamara; Rossaint, Rolf; Bleilevens, Christian] Univ Hosp RWTH Aachen, Dept Anesthesiol, Pauwelsstr 30, D-52074 Aachen, Germany; [Hosseinnejad, Aisa; Jakob, Felix; Schwaneberg, Ulrich; Singh, Smriti] DWI Leibniz Inst Interact Mat eV, Forckenbeckstr 50, D-52056 Aachen, Germany; [Breuer, Thomas] Univ Hosp RWTH Aachen, Dept Intens Care & Intermediate Care, Pauwelsstr 3…	RWTH Aachen University; RWTH Aachen University Hospital; Leibniz Association; DWI Leibniz Institute for Interactive Materials; RWTH Aachen University; RWTH Aachen University Hospital; RWTH Aachen University; Max Planck Society	Bleilevens, C (corresponding author), Univ Hosp RWTH Aachen, Dept Anesthesiol, Pauwelsstr 30, D-52074 Aachen, Germany.;Singh, S (corresponding author), DWI Leibniz Inst Interact Mat eV, Forckenbeckstr 50, D-52056 Aachen, Germany.;Singh, S (corresponding author), Max Planck Inst Med Res, Jahnstr 29, D-69120 Heidelberg, Germany.	pwinnersbach@ukaachen.de; hosseinnejad@dwi.rwth-aachen.de; tbreuer@ukaachen.de; tfechter@ukaachen.de; jakob@dwi.rwth-aachen.de; u.schwaneberg@biotec.rwth-aachen.de; rrossaint@ukaachen.de; cbleilevens@ukaachen.de; smriti.singh@mr.mpg.de	; Singh, Smriti/AAA-6444-2022; Jakob, Franz/F-9894-2015; Schwaneberg, Ulrich/E-7234-2014	Larsson (Hosseinnejad), Aisa/0009-0009-1227-9161; Jakob, Felix/0000-0002-9815-2066; Singh, Smriti/0000-0002-2164-9912; Winnersbach, Patrick/0000-0001-6979-6818;	German Research Foundation [DFG RO 2000/23-1, SI 2164/2-1]	German Research Foundation(German Research Foundation (DFG))	FundingThis research was funded by the German Research Foundation, grant numbers DFG RO 2000/23-1 and SI 2164/2-1.		55	18	19	1	28	MDPI	BASEL	ST ALBAN-ANLAGE 66, CH-4052 BASEL, SWITZERLAND		2077-0375		MEMBRANES-BASEL	Membranes	JAN	2022	12	1
J	Shaukat, A; Yang, C; Yang, YP; Guo, YF; Jiang, KF; Guo, S; Liu, JF; Zhang, T; Zhao, G; Ma, XF; Wu, ZM; Zhou, QQ; Akhtar, M; Zahoor, A; Umar, T; Shaukat, I; Hanif, S; Rajput, SA; Hassan, M; Mehmood, K; Hua, Z; Wang, XY; Yin, NN; Deng, GZ				Shaukat, Aftab; Yang, Chao; Yang, Yaping; Guo, Ying-fang; Jiang, Kangfeng; Guo, Shuai; Liu, Junfeng; Zhang, Tao; Zhao, Gan; Ma, Xiaofei; Wu, Zhiming; Zhou, Qingqing; Akhtar, Muhammad; Zahoor, Arshad; Umar, Talha; Shaukat, Irfan; Hanif, Sana; Rajput, Shahid Ali; Hassan, Mubashar; Mehmood, Khalid; Hua, Zhang; Wang Xiaoyan; Yin Nannan; Deng, Ganzhen			Ginsenoside Rb 1: A novel therapeutic agent in Staphylococcus aureus-induced Acute Lung Injury with special reference to Oxidative stress and Apoptosis	MICROBIAL PATHOGENESIS			English	Article						Acute lung injury; Staphylococcus aureus; Ginsenoside Rb1; Oxidative stress; Nrf2 pathway; Mitochondria-mediated apoptosis pathway	NF-KAPPA-B; INTESTINAL ISCHEMIA-REPERFUSION; MITOCHONDRIAL BIOGENESIS; INDUCED ENDOMETRITIS; EPITHELIAL-CELLS; LIPOPOLYSACCHARIDE; MICE; INFLAMMATION; INHIBITION; ACTIVATOR	Acute lung injury (ALI) is considered as an uncontrolled inflammatory response that can leads to acute respiratory distress syndrome (ARDS), which limits the therapeutic strategies. Ginsenosides Rb1 (Rb1), an active ingredient obtained from Panax ginseng, possesses a broad range of pharmacological and medicinal properties, comprising the anti-inflammatory, anti-oxidant, and anti-tumor activities.…	[Shaukat, Aftab; Yang, Chao; Yang, Yaping; Guo, Ying-fang; Jiang, Kangfeng; Guo, Shuai; Liu, Junfeng; Zhang, Tao; Zhao, Gan; Ma, Xiaofei; Wu, Zhiming; Zhou, Qingqing; Akhtar, Muhammad; Zahoor, Arshad; Umar, Talha; Hua, Zhang; Wang Xiaoyan; Yin Nannan; Deng, Ganzhen] Huazhong Agr Univ, Coll Vet Med, Dept Clin Vet Med, Wuhan 430070, Peoples R China; [Shaukat, Irfan] Univ Lorraine, Fac Med, Nancy, F…	Huazhong Agricultural University; Universite de Lorraine; Huazhong Agricultural University; Tarim University; Islamia University of Bahawalpur; South China Agricultural University; University of Gujrat	Deng, GZ (corresponding author), Huazhong Agr Univ, Coll Vet Med, Dept Clin Vet Med, Wuhan 430070, Peoples R China.	ganzhendeng@sohtt.com	Ma, Xiaofei/KFA-3269-2024; Zahoor, Arshad/AAD-6812-2021; Rajput, Shahid Ali/ABG-5747-2021; Zhang, Hua/V-4303-2019; Hanif, Sana/OBO-2051-2025; Guo, Shuai/LEM-1401-2024; Umar, Talha/AAC-5866-2022; Shaukat, Aftab/ABH-1570-2021; MEHMOOD, KHALID/Y-5882-2019; Mehmood, Khalid/Y-5882-2019; Akhtar, Muhammad/HZJ-9075-2023	AKHTAR, MUHAMMAD/0000-0002-3016-9670; umar, Talha/0000-0003-2167-1893; Rajput, Shahid Ali/0000-0001-9172-7827; Guo, Shuai/0000-0002-4072-704X; Hassan, Mubashar/0000-0002-4565-2956; MEHMOOD, KHALID/0000-0003-4720-8792;	National Natural Science Foundation of China [31772816]	National Natural Science Foundation of China(National Natural Science Foundation of China (NSFC))	We thank all members of the Laboratory of Veterinary Clinical Diagnosis for helpful discussions and suggestions. This study was supported by a grant from the National Natural Science Foundation of China [No. 31772816].		68	20	21	2	35	ACADEMIC PRESS LTD- ELSEVIER SCIENCE LTD	LONDON	24-28 OVAL RD, LONDON NW1 7DX, ENGLAND	0882-4010			MICROB PATHOGENESIS	Microb. Pathog.	JUN	2020	143
J	Guimaraes, ARDS; Bizerra, PFV; Miranda, CA; Mingatto, FE				de Jesus Santos Guimaraes, Anilda Rufino; Veiga Bizerra, Paulo Francisco; Miranda, Camila Araujo; Mingatto, Fabio Erminio			Effects of imidacloprid on viability and increase of reactive oxygen and nitrogen species in HepG2 cell line	TOXICOLOGY MECHANISMS AND METHODS			English	Article						Cytotoxicity; oxidative stress; liver; insecticide; cell death	NEONICOTINOID INSECTICIDES; OXIDATIVE STRESS; DNA-DAMAGE; COLORIMETRIC ASSAY; HUMAN EXPOSURE; TOXICITY; GLUTATHIONE; LIVER; RATS; HEPATOCYTES	Imidacloprid (IMD) is a neonicotinoid insecticide used in large quantities worldwide in both veterinary and agronomic applications. Several studies have shown adverse effects of IMD on non-target organisms, with the liver being identified as the main affected organ. This study aimed to evaluate the effects of IMD on human hepatoblastoma (HepG2) cells. HepG2 were exposed to IMD (0.25-2.0 mM) for 2…	[de Jesus Santos Guimaraes, Anilda Rufino; Veiga Bizerra, Paulo Francisco; Miranda, Camila Araujo; Mingatto, Fabio Erminio] Sao Paulo State Univ UNESP, Coll Agr & Technol Sci, Dept Anim Sci, BR-17900000 Dracena, SP, Brazil; [Veiga Bizerra, Paulo Francisco] Maringa State Univ UEM, Dept Biochem, Maringa, Parana, Brazil	Universidade Estadual Paulista; Universidade Estadual de Maringa	Mingatto, FE (corresponding author), Sao Paulo State Univ UNESP, Coll Agr & Technol Sci, Dept Anim Sci, BR-17900000 Dracena, SP, Brazil.	fabio.mingatto@unesp.br	Mingatto, Fábio/F-5984-2011; Araújo Miranda, Camila/HHM-5900-2022; Bizerra, Paulo Francisco/JFT-1923-2023	Veiga Bizerra, Paulo Francisco/0000-0002-4264-4854; Mingatto, Fabio Erminio/0000-0003-3488-1814; Araujo Miranda, Camila/0000-0002-7653-9091	Fundacao de Amparoa Pesquisa do Estado de Sao Paulo-FAPESP [2015/19549-8]; Coordenacao de Aperfeicoamento de Pessoal de Nivel Superior-Brasil [001]	Fundacao de Amparoa Pesquisa do Estado de Sao Paulo-FAPESP(Fundacao de Amparo a Pesquisa do Estado de Sao Paulo (FAPESP)); Coordenacao de Aperfeicoamento de Pessoal de Nivel Superior-Brasil(Coordenacao de Aperfeicoamento de Pessoal de Nivel Superior (CAPES))	This work was supported by the Fundacao de Amparoa Pesquisa do Estado de Sao Paulo-FAPESP (Grant number 2015/19549-8) and the Coordenacao de Aperfeicoamento de Pessoal de Nivel Superior-Brasil (CAPES)-Finance Code 001.		74	11	13	1	21	TAYLOR & FRANCIS LTD	ABINGDON	2-4 PARK SQUARE, MILTON PARK, ABINGDON OR14 4RN, OXON, ENGLAND	1537-6516	1537-6524		TOXICOL MECH METHOD	Toxicol. Mech. Methods	MAR 24	2022	32	3
J	Liu, QM; Gao, Y; Ci, XX				Liu, Qinmei; Gao, Yun; Ci, Xinxin			Role of Nrf2 and Its Activators in Respiratory Diseases	OXIDATIVE MEDICINE AND CELLULAR LONGEVITY			English	Review							ACUTE LUNG INJURY; TRANSCRIPTION FACTOR NRF2; SMOKE-INDUCED EMPHYSEMA; OBSTRUCTIVE PULMONARY-DISEASE; INDUCED OXIDATIVE STRESS; AIRWAY EPITHELIAL-CELLS; ANTIOXIDANT RESPONSE ELEMENT; ERYTHROID 2-RELATED FACTOR-2; SYNCYTIAL VIRUS-INFECTION; GLUTATHIONE-S-TRANSFERASE	Transcription factor nuclear factor erythroid 2-related factor 2 (Nrf2) is a major regulator of antioxidant response element- (ARE-) driven cytoprotective protein expression. The activation of Nrf2 signaling plays an essential role in preventing cells and tissues from injury induced by oxidative stress. Under the unstressed conditions, natural inhibitor of Nrf2, Kelch-like ECH-associated protein …	[Liu, Qinmei; Ci, Xinxin] Jilin Univ, Hosp 1, Inst Translat Med, Changchun 130001, Jilin, Peoples R China; [Gao, Yun] Jilin Univ, Hosp 1, Dept Resp Med, Changchun 130001, Jilin, Peoples R China	Jilin University; Jilin University	Ci, XX (corresponding author), Jilin Univ, Hosp 1, Inst Translat Med, Changchun 130001, Jilin, Peoples R China.	cixinxin@jlu.edu.cn	gao, yun/LWK-5634-2024		National Natural Science Foundation of China [81603174]; China Postdoctoral Science Foundation [168847]	National Natural Science Foundation of China(National Natural Science Foundation of China (NSFC)); China Postdoctoral Science Foundation(China Postdoctoral Science Foundation)	This work was in part supported by the National Natural Science Foundation of China (Grant No. 81603174) and the General Financial Grant from the China Postdoctoral Science Foundation (Grant No. 168847).		178	234	261	0	46	HINDAWI LTD	LONDON	ADAM HOUSE, 3RD FLR, 1 FITZROY SQ, LONDON, W1T 5HF, ENGLAND	1942-0900	1942-0994		OXID MED CELL LONGEV	Oxidative Med. Cell. Longev.		2019	2019
J	O'Halloran, EB; Curtis, BJ; Afshar, M; Chen, MM; Kovacs, EJ; Burnham, EL				O'Halloran, Eileen Bock; Curtis, Brenda J.; Afshar, Majid; Chen, Michael M.; Kovacs, Elizabeth J.; Burnham, Ellen L.			Alveolar macrophage inflammatory mediator expression is elevated in the setting of alcohol use disorders	ALCOHOL			English	Article						AUD; Pulmonary; Inflammation; Alveolar macrophage; Cytokine	NECROSIS-FACTOR-ALPHA; COMMUNITY-ACQUIRED PNEUMONIA; EPITHELIAL-CELLS; LIVER-DISEASE; HOST-DEFENSE; IN-VITRO; ETHANOL; LUNG; ACTIVATION; GLUTATHIONE	Alcohol use disorders (AUDs) are associated with increased susceptibility to pulmonary diseases, including bacterial pneumonia and acute respiratory distress syndrome (ARDS). Alveolar macrophages (AMs) play a vital role in the clearance of pathogens and regulation of inflammation, but these functions may be impaired in the setting of alcohol exposure. We examined the effect of AUDs on profiles of…	[O'Halloran, Eileen Bock; Curtis, Brenda J.; Chen, Michael M.; Kovacs, Elizabeth J.] Loyola Univ, Dept Surg, Chicago Stritch Sch Med, 2160 S 1st Ave, Maywood, IL 60153 USA; [O'Halloran, Eileen Bock; Curtis, Brenda J.; Afshar, Majid; Chen, Michael M.; Kovacs, Elizabeth J.] Loyola Univ, Alcohol Res Program, Chicago Stritch Sch Med, 2160 S 1st Ave, Maywood, IL 60153 USA; [O'Halloran, Eileen Bock; Cu…	Loyola University Chicago; Loyola University Chicago; Loyola University Chicago; University of Colorado System; University of Colorado Anschutz Medical Campus	Kovacs, EJ (corresponding author), Bldg 110,Room 4232,2160 S First Ave, Maywood, IL 60153 USA.	ekovacs@luc.edu	; Afshar, Majid/AAD-8365-2019	burnham, ellen/0000-0002-9945-0284; Chen, Michael/0000-0002-8773-0879; O'Halloran, Eileen/0000-0002-4783-6847; Afshar, Majid/0000-0002-6368-4652	NIH [R24AA019661, R01AA012034, R01GM115257, F30AA022856, T32AA013527]	NIH(United States Department of Health & Human ServicesNational Institutes of Health (NIH) - USA)	Funding for this research was provided by NIH grants R24AA019661 (ELB), R01AA012034 (EJK), R01GM115257 (EJK), F30AA022856 (MMC), and T32AA013527 (EJK).		46	24	26	0	7	ELSEVIER SCIENCE INC	NEW YORK	360 PARK AVE SOUTH, NEW YORK, NY 10010-1710 USA	0741-8329	1873-6823		ALCOHOL	Alcohol	FEB	2016	50
J	Li, J; Deng, SH; Li, J; Li, L; Zhang, F; Zou, Y; Wu, DM; Xu, Y				Li, Jin; Deng, Shi-hua; Li, Jing; Li, Li; Zhang, Feng; Zou, Ye; Wu, Dong-ming; Xu, Ying			Obacunone alleviates ferroptosis during lipopolysaccharide-induced acute lung injury by upregulating Nrf2-dependent antioxidant responses	CELLULAR & MOLECULAR BIOLOGY LETTERS			English	Article						Obacunone; Nrf2; Ferroptosis; Acute lung injury; Lipopolysaccharide	PROTECTS; CELLS; MAPK; ARDS	Background Acute lung injury (ALI) has received considerable attention in the field of intensive care as it is associated with a high mortality rate. Obacunone (OB), widely found in citrus fruits, is a natural bioactive compound with anti-inflammatory and antioxidant activities. However, it is not clear whether OB protects against lipopolysaccharide (LPS)-induced ALI. Therefore, in this study, we…	[Li, Jin; Deng, Shi-hua; Li, Jing; Li, Li; Zhang, Feng; Zou, Ye; Wu, Dong-ming; Xu, Ying] Chengdu Med Coll, Affiliated Hosp 1, Chengdu 610500, Sichuan, Peoples R China; [Li, Jin; Deng, Shi-hua; Li, Jing; Li, Li; Zhang, Feng; Zou, Ye; Wu, Dong-ming; Xu, Ying] Chengdu Med Coll, Sch Clin Med, Chengdu 610500, Sichuan, Peoples R China	Chengdu Medical College; Chengdu Medical College	Wu, DM; Xu, Y (corresponding author), Chengdu Med Coll, Affiliated Hosp 1, Chengdu 610500, Sichuan, Peoples R China.;Wu, DM; Xu, Y (corresponding author), Chengdu Med Coll, Sch Clin Med, Chengdu 610500, Sichuan, Peoples R China.	harvey1989@126.com; yingxu825@126.com		Xu, Ying/0000-0001-9570-8666; Wu, Dongming/0000-0002-5806-5646	National Natural Science Foundation of China [81972977, 81802955]; Foundation of Science and Technology Innovation Talent Project of Sichuan Province [2021038]; Foundation of Health Commission of Sichuan Province [20ZD016]; Foundation of Health Commission of Chengdu [2021001]; Foundation of Chengdu Science and Technology Bureau [2021-YF05-00291-SN]; Foundation of Sichuan Science and Technology Ag…	National Natural Science Foundation of China(National Natural Science Foundation of China (NSFC)); Foundation of Science and Technology Innovation Talent Project of Sichuan Province; Foundation of Health Commission of Sichuan Province; Foundation of Health Commission of Chengdu; Foundation of Chengdu Science and Technology Bureau; Foundation of Sichuan Science and Technology Agency; Foundation of…	This study was funded by the National Natural Science Foundation of China (81972977 and 81802955), the Foundation of Science and Technology Innovation Talent Project of Sichuan Province (2021038), the Foundation of Health Commission of Sichuan Province (20ZD016), the Foundation of Health Commission of Chengdu (2021001), the Foundation of Chengdu Science and Technology Bureau (2021-YF05-00291-SN),…		46	113	133	2	85	BMC	LONDON	CAMPUS, 4 CRINAN ST, LONDON N1 9XW, ENGLAND	1425-8153	1689-1392		CELL MOL BIOL LETT	Cell. Mol. Biol. Lett.	DEC	2022	27	1
J	Yalaza, M; Akin, I; Altiner, S; Ayral, PA; Yazihan, N				Yalaza, Metin; Akin, Irem; Altiner, Seda; Aribal Ayral, Pelin; Yazihan, Nuray			Is carnosine effective to alleviate lung injury: a systematic review	TURKISH JOURNAL OF BIOCHEMISTRY-TURK BIYOKIMYA DERGISI			English	Review						carnosine; lung; lung injury; respiratory diseases; systematic review	NITRIC-OXIDE; FLUID; PATHOGENESIS; GLUTATHIONE	Objectives: Lung injury is one of the most important risk factor for morbidity and mortality, especially in older people. There are several reasons causing acute lung injury (ALI) and acute respiratory distress syndrome (ARDS) such as pneumonia, sepsis, viruses, oxidants, and trauma. Evidence has shown that carnosine has many properties, such as suppressing hydroxyl, superoxide, and peroxyl radic…	[Akin, Irem; Aribal Ayral, Pelin; Yazihan, Nuray] Ankara Univ, Interdisciplinary Food Metab & Clin Nutr Dept, Inst Hlth Sci, Ankara, Turkey; [Yazihan, Nuray] Ankara Univ, Med Sch, Pathophysiol Dept, Internal Med, Ankara, Turkey; [Yalaza, Metin] Ankara City Hosp, Republ Turkey Minist Hlth, Ankara, Turkey; [Altiner, Seda] Necip Fazil City Hosp, Allergy & Clin Immunol Clin, Kahramanmaras, Turkey; [A…	Ankara University; Ankara University; City Hospital Ankara; Ministry of Health - Turkey; Kahramanmaras Necip Fazil City Hospital; Ankara University	Yazihan, N (corresponding author), Ankara Univ, Interdisciplinary Food Metab & Clin Nutr Dept, Inst Hlth Sci, Ankara, Turkey.;Yazihan, N (corresponding author), Ankara Univ, Med Sch, Pathophysiol Dept, Internal Med, Ankara, Turkey.	nurayyazihan@yahoo.com	Altiner, Seda/AAH-5929-2019; AYRAL, Pelin/AAJ-1044-2020; Yalaza, Metin/AEH-5362-2022; Yazihan, Nuray/M-8409-2015; altiner, seda/AAH-5929-2019; Yazihan, Nuray/AAF-5819-2020	Altiner, Seda/0000-0001-5648-4284; Aribal Ayral, Pelin/0000-0002-5047-7881; Yazihan, Nuray/0000-0003-1237-8468;					36	2	2	0	11	WALTER DE GRUYTER GMBH	BERLIN	GENTHINER STRASSE 13, D-10785 BERLIN, GERMANY	0250-4685	1303-829X		TURK J BIOCHEM	Turk. J. Biochem.	MAR 8	2022	47	1
J	Chen, SY; Zheng, SJ; Liu, ZW; Tang, CS; Zhao, B; Du, JB; Jin, HF				Chen, Siyao; Zheng, Saijun; Liu, Zhiwei; Tang, Chaoshu; Zhao, Bin; Du, Junbao; Jin, Hongfang			Endogeous sulfur dioxide protects against oleic acid-induced acute lung injury in association with inhibition of oxidative stress in rats	LABORATORY INVESTIGATION			English	Article							CASPASE-3 ACTIVATION; PATHOGENESIS; MECHANISMS; GENERATION; HYPEROXIA; TOXICITY; CAPACITY; ROLES; MICE; ARDS	The role of endogenous sulfur dioxide (SO2), an efficient gasotransmitter maintaining homeostasis, in the development of acute lung injury (ALI) remains unidentified. We aimed to investigate the role of endogenous SO2 in the pathogenesis of ALI. An oleic acid (OA)-induced ALI rat model was established. Endogenous SO2 levels, lung injury, oxidative stress markers and apoptosis were examined. OA-in…	[Chen, Siyao; Du, Junbao; Jin, Hongfang] Peking Univ, Hosp 1, Dept Pediat, Beijing 100871, Peoples R China; [Zheng, Saijun; Liu, Zhiwei; Zhao, Bin] Beijing Jishuitan Hosp, Dept Emergency, Beijing, Peoples R China; [Tang, Chaoshu] Peking Univ, Hlth Sci Ctr, Dept Physiol & Pathophysiol, Beijing 100871, Peoples R China; [Tang, Chaoshu; Du, Junbao] Minist Educ, Dept Gasotransmitters & Cardiovasc Dis,…	Peking University; Peking University	Zhao, B (corresponding author), Beijing Jishuitan Hosp, Dept Emergency, 31 XinJiekou East St, Beijing 100035, Peoples R China.	zhaobin60@yahoo.com.cn; junbaodu1@126.com; jinhongfang51@126.com	chen, siyao/AHA-7993-2022; liu, Liu/GXV-5581-2022	Jin, Hongfang/0000-0002-1606-8988	National Natural Science Foundation of China [31130030, 91439110, 31440052]; Major Basic Research Development Program of People's Republic of China [2012CB517806, 2011CB503904]	National Natural Science Foundation of China(National Natural Science Foundation of China (NSFC)); Major Basic Research Development Program of People's Republic of China(National Basic Research Program of China)	We thank Dingfang Bu and Yaqian Huang for their technical assistance. This work was supported by the National Natural Science Foundation of China (31130030), the Major Basic Research Development Program of People's Republic of China (2012CB517806, 2011CB503904), and the National Natural Science Foundation of China (91439110, 31440052).		55	47	56	2	33	NATURE PUBLISHING GROUP	NEW YORK	75 VARICK ST, 9TH FLR, NEW YORK, NY 10013-1917 USA	0023-6837	1530-0307		LAB INVEST	Lab. Invest.	FEB	2015	95	2
J	Peng, F; Yin, HY; Du, B; Niu, K; Yang, YD; Wang, SJ				Peng, Fei; Yin, Hongyang; Du, Bin; Niu, Kui; Yang, Yuedong; Wang, Shujun			Anti-inflammatory effect of flavonoids from chestnut flowers in lipopolysaccharide-stimulated RAW 264.7 macrophages and acute lung injury in mice	JOURNAL OF ETHNOPHARMACOLOGY			English	Article						Chestnut flower; Flavonoids; Anti-inflammatory; Acute lung injury; Macrophages	NF-KAPPA-B; NITRIC-OXIDE; INFLAMMATION; ACID; EXTRACTS; AGENTS; ARDS	Ethnopharmacological relevance: Chestnut flowers were one of the by-products during chestnut industrial processing. Chestnut (Castanea mollissima Blume) flower is rich in flavonoids and has been used as a traditional medicine to treat a variety of diseases including respiratory disorders for a long history. Aim of the study: The present study aims to investigate the potential anti-inflammatory ef…	[Peng, Fei; Du, Bin; Niu, Kui; Yang, Yuedong] Hebei Normal Univ Sci & Technol, Engn Res Ctr Chestnut Ind Technol, Minist Educ, Qinhuangdao 066000, Hebei, Peoples R China; [Peng, Fei; Du, Bin; Niu, Kui; Yang, Yuedong] Hebei Normal Univ Sci & Technol, Collaborat Innovat Ctr Hebei Chestnut Ind, Qinhuangdao 066000, Hebei, Peoples R China; [Peng, Fei; Yin, Hongyang; Du, Bin; Niu, Kui; Yang, Yuedong] H…	Hebei Normal University of Science & Technology; Hebei Normal University of Science & Technology; Hebei Normal University of Science & Technology; Tianjin University Science & Technology	Wang, SJ (corresponding author), Tianjin Univ Sci & Technol, State Key Lab Food Nutr & Safety, Tianjin 300457, Peoples R China.;Yang, YD (corresponding author), Hebei Normal Univ Sci & Technol, 360 Hebei Rd, Qinhuangdao 066000, Hebei, Peoples R China.	feipeng1986@hotmail.com; yinhongyang66@163.com; bindufood@aliyun.com; kui-niu@outlook.com; yuedongyang@hotmail.com; sjwang@tust.edu.cn	; Wang, Shujun/AAD-7001-2020; du, bin/AAP-3860-2021	du, bin/0000-0003-2146-5854;	Hebei Chestnut Industry Collabora-tive Innovation Center project [20210416]	Hebei Chestnut Industry Collabora-tive Innovation Center project	Funding This research was supported by Hebei Chestnut Industry Collabora-tive Innovation Center project (Project No. 20210416) .		56	15	17	3	53	ELSEVIER IRELAND LTD	CLARE	ELSEVIER HOUSE, BROOKVALE PLAZA, EAST PARK SHANNON, CO, CLARE, 00000, IRELAND	0378-8741	1872-7573		J ETHNOPHARMACOL	J. Ethnopharmacol.	MAY 23	2022	290
J	Rochette, L; Ghibu, S				Rochette, Luc; Ghibu, Steliana			Mechanics Insights of Alpha-Lipoic Acid against Cardiovascular Diseases during COVID-19 Infection	INTERNATIONAL JOURNAL OF MOLECULAR SCIENCES			English	Review						COVID-19; SARS-CoV-2; alpha-lipoic acid; cardiovascular disease; oxidative stress; inflammation	ANGIOTENSIN-CONVERTING ENZYME; OXIDATIVE STRESS; DIABETIC POLYNEUROPATHY; ANTIOXIDANT PROPERTIES; DOUBLE-BLIND; KETOGLUTARATE DEHYDROGENASE; ISCHEMIA-REPERFUSION; RAT-HEART; EXPRESSION; PLACEBO	Coronavirus disease 2019 (COVID-19) was first reported in Wuhan, China, in late December 2019. Since then, COVID-19 has spread rapidly worldwide and was declared a global pandemic on 20 March 2020. Cardiovascular complications are rapidly emerging as a major peril in COVID-19 in addition to respiratory disease. The mechanisms underlying the excessive effect of severe acute respiratory syndrome co…	[Rochette, Luc] Univ Bourgogne Franche Comte, Fac Sci Sante, Physiopathol & Epidemiol Cerebro Cardiovasc PEC2, Equipe Accueil EA 7460, F-21000 Dijon, France; [Ghibu, Steliana] Iuliu Hatieganu Univ Med & Pharm, Fac Pharm, Dept Pharmacol Physiol & Pathophysiol, Cluj Napoca 400349, Romania	Universite Bourgogne Europe; Iuliu Hatieganu University of Medicine & Pharmacy	Ghibu, S (corresponding author), Iuliu Hatieganu Univ Med & Pharm, Fac Pharm, Dept Pharmacol Physiol & Pathophysiol, Cluj Napoca 400349, Romania.	luc.rochette@u-bourgogne.fr; steliana.ghibu@umfcluj.ro	Ghibu, Steliana/X-4723-2019	Ghibu, Steliana/0000-0003-2247-4613					124	25	33	0	8	MDPI	BASEL	MDPI AG, Grosspeteranlage 5, CH-4052 BASEL, SWITZERLAND	1661-6596	1422-0067		INT J MOL SCI	Int. J. Mol. Sci.	AUG	2021	22	15
J	Miranda, CA; Guimaraes, ARDS; Bizerra, PFV; Mingatto, FE				Miranda, Camila Araujo; de Jesus Santos Guimaraes, Anilda Rufino; Veiga Bizerra, Paulo Francisco; Mingatto, Fabio Erminio			Diazinon impairs bioenergetics and induces membrane permeability transition on mitochondria isolated from rat liver	JOURNAL OF TOXICOLOGY AND ENVIRONMENTAL HEALTH-PART A-CURRENT ISSUES			English	Article						Diazinon; liver; oxidative phosphorylation; mitochondrial membrane permeability transition; toxicity	SUBACUTE DIAZINON; VITAMIN-E; INDUCED HEPATOTOXICITY; OXIDATIVE STRESS; CELL-DEATH; ORGANOPHOSPHATE; DYSFUNCTION; APOPTOSIS; TOXICITY; CANCER	Diazinon (DZN) is a broad-spectrum insecticide extensively used to control pests in crops and animals. Several investigators demonstrated that DZN produced tissue toxicity especially to the liver. In addition, the mitochondrion was implicated in DZN-induced toxicity, but the precise role of this organelle remains to be determined. The aim of this study was thus to examine the effects of DZN (50 t…	[Miranda, Camila Araujo; de Jesus Santos Guimaraes, Anilda Rufino; Veiga Bizerra, Paulo Francisco; Mingatto, Fabio Erminio] Sao Paulo State Univ Unesp, Coll Agr & Technol Sci, Dept Anim Prod, Dracena, Brazil	Universidade Estadual Paulista	Mingatto, FE (corresponding author), Sao Paulo State Univ Unesp, Coll Agr & Technol Sci, BR-17900000 Dracena, SP, Brazil.	fabio.mingatto@unesp.br	; Bizerra, Paulo Francisco/JFT-1923-2023; Mingatto, Fábio/F-5984-2011; Araújo Miranda, Camila/HHM-5900-2022	Mingatto, Fabio Erminio/0000-0003-3488-1814; Araujo Miranda, Camila/0000-0002-7653-9091; Veiga Bizerra, Paulo Francisco/0000-0002-4264-4854;	Fundacao de Amparo a Pesquisa do Estado de Sao Paulo [2018/22002-9]	Fundacao de Amparo a Pesquisa do Estado de Sao Paulo(Fundacao de Amparo a Pesquisa do Estado de Sao Paulo (FAPESP))	This research was supported by the Fundacao de Amparo a Pesquisa do Estado de Sao Paulo [Grant: 2018/22002-9].		77	10	12	0	5	TAYLOR & FRANCIS INC	PHILADELPHIA	530 WALNUT STREET, STE 850, PHILADELPHIA, PA 19106 USA	1528-7394	1087-2620		J TOXICOL ENV HEAL A	J. Toxicol. Env. Health Part A	SEP 16	2020	83	17-18
[truncated: 22 more columns]

## Sheet: Scopus
Authors	Author full names	Author(s) ID	Title	Year	Source title	Volume	Issue	Art. No.	Page start	Page end	Page count	Cited by	DOI	Link	Document Type	Publication Stage	Open Access	Source	EID
Y., Wu, Yaxian; Y., Zhang, Yaru; L., Ge, Longlong; S., He, Shuai; Y., Zhang, Yanli; D., Chen, Dan; Y., Nie, Yunjuan; M., Zhu, Minmin; Q., Pang, Qingfeng	Wu, Yaxian (57145576100); Zhang, Yaru (57641006800); Ge, Longlong (59344448300); He, Shuai (58250194900); Zhang, Yanli (59069538200); Chen, Dan (59773401100); Nie, Yunjuan (57146329700); Zhu, Minmin (57739501700); Pang, Qingfeng (12803279700)	57145576100; 57641006800; 59344448300; 58250194900; 59069538200; 59773401100; 57146329700; 57739501700; 12803279700	RTA408 alleviates lipopolysaccharide-induced acute lung injury via inhibiting Bach1-mediated ferroptosis	2024	International Immunopharmacology	142		113250			0	6	10.1016/j.intimp.2024.113250	https://www.scopus.com/inward/record.uri?eid=2-s2.0-85204980442&doi=10.1016%2Fj.intimp.2024.113250&partnerID=40&md5=8f2a7a3c05a3c6c71238d488db71b104	Article	Final		Scopus	2-s2.0-85204980442
P., Xing, Pengcheng; M., Zhou, Minjie; J., Sun, Jian; D., Wang, Donglian; W., Huang, Weipeng; P., An, Peng	Xing, Pengcheng (57192714185); Zhou, Minjie (57198736254); Sun, Jian (59276560400); Wang, Donglian (57202057058); Huang, Weipeng (58754948400); An, Peng (55667946100)	57192714185; 57198736254; 59276560400; 57202057058; 58754948400; 55667946100	NAT10-mediated ac4C acetylation of TFRC promotes sepsis-induced pulmonary injury through regulating ferroptosis	2024	Molecular Medicine	30	1	140			0	9	10.1186/s10020-024-00912-w	https://www.scopus.com/inward/record.uri?eid=2-s2.0-85203380273&doi=10.1186%2Fs10020-024-00912-w&partnerID=40&md5=0b013e401e37af48c1e0f010e010ae1c	Article	Final	All Open Access; Gold Open Access; Green Accepted Open Access; Green Open Access	Scopus	2-s2.0-85203380273
J., Xu, Jian; C., Zhang, Chenfei; K., Wu, Keren; Y., Qian, Yanhua; W., Hu, Wei	Xu, Jian (59173540700); Zhang, Chenfei (59174128600); Wu, Keren (59173838100); Qian, Yanhua (59173540800); Hu, Wei (59173540900)	59173540700; 59174128600; 59173838100; 59173540800; 59173540900	A comparative analysis of sivelestat sodium hydrate and ulinastatin combination therapy in the treatment of sepsis with acute respiratory distress syndrome	2024	BMC Pulmonary Medicine	24	1	283			0	3	10.1186/s12890-024-03083-w	https://www.scopus.com/inward/record.uri?eid=2-s2.0-85196076525&doi=10.1186%2Fs12890-024-03083-w&partnerID=40&md5=e673fd1c0dee72d16444103fa0aecef1	Article	Final	All Open Access; Gold Open Access; Green Final Open Access; Green Open Access	Scopus	2-s2.0-85196076525
C., Yang, Chun; Y., Tan, Yuanyuan; Z., Li, Zihao; L., Hu, Lei; Y., Chen, Yuanyuan; S., Zhu, Shouliang; J., Hu, Jiawei; T., Huai, Tingting; M., Li, Mingqing; G., Zhang, Guobin	Yang, Chun (58923034300); Tan, Yuanyuan (58554361400); Li, Zihao (59126475100); Hu, Lei (59125789900); Chen, Yuanyuan (58432526400); Zhu, Shouliang (59125455100); Hu, Jiawei (59125455200); Huai, Tingting (59126306100); Li, Mingqing (59125455300); Zhang, Guobin (59817682300)	58923034300; 58554361400; 59126475100; 59125789900; 58432526400; 59125455100; 59125455200; 59126306100; 59125455300; 59817682300	Pulmonary redox imbalance drives early fibroproliferative response in moderate/severe coronavirus disease-19 acute respiratory distress syndrome and impacts long-term lung abnormalities	2024	Annals of Intensive Care	14	1	72			0	7	10.1186/s13613-024-01293-3	https://www.scopus.com/inward/record.uri?eid=2-s2.0-85192982476&doi=10.1186%2Fs13613-024-01293-3&partnerID=40&md5=30c3e53de21ca431f56e9d9e22a32d65	Article	Final	All Open Access; Gold Open Access; Green Final Open Access; Green Open Access	Scopus	2-s2.0-85192982476
M., Rostami, Mitra; P., Farahani, Pouria; S., Esmaelian, Samar; Z., Bahman, Zahra; A., Fadel Hussein, Abbas; H., A.Alrikabi, Hareth; M., Hosseini Hooshiar, Mohammad; S., Yasamineh, Saman	Rostami, Mitra (58868262200); Farahani, Pouria (58682174100); Esmaelian, Samar (58757201500); Bahman, Zahra (58561813200); Fadel Hussein, Abbas (59263063000); A.Alrikabi, Hareth (58990596600); Hosseini Hooshiar, Mohammad (58952935900); Yasamineh, Saman (57210190413)	58868262200; 58682174100; 58757201500; 58561813200; 59263063000; 58990596600; 58952935900; 57210190413	The Role of Dental-derived Stem Cell-based Therapy and Their Derived Extracellular Vesicles in Post-COVID-19 Syndrome-induced Tissue Damage	2024	Stem Cell Reviews and Reports	20	8		2062	2103	0	7	10.1007/s12015-024-10770-y	https://www.scopus.com/inward/record.uri?eid=2-s2.0-85201374196&doi=10.1007%2Fs12015-024-10770-y&partnerID=40&md5=dec02b91f39a0ae32144d39326f894b9	Article	Final		Scopus	2-s2.0-85201374196
G., Long, Guangwen; Q., Zhang, Qian; X., Yang, Xiulin; H., Sun, Hongpeng; C., Ji, Chunling	Long, Guangwen (57488601000); Zhang, Qian (57195954740); Yang, Xiulin (57201748207); Sun, Hongpeng (57255800600); Ji, Chunling (55995372300)	57488601000; 57195954740; 57201748207; 57255800600; 55995372300	miR-141-3p attenuates inflammation and oxidative stress–induced pulmonary fibrosis in ARDS via the Keap1/Nrf2/ARE signaling pathway	2024	Immunologic Research	72	5		1003	1017	0	4	10.1007/s12026-024-09503-7	https://www.scopus.com/inward/record.uri?eid=2-s2.0-85195636934&doi=10.1007%2Fs12026-024-09503-7&partnerID=40&md5=9b63e5c07d6238226fd4e8b97ff7289e	Article	Final		Scopus	2-s2.0-85195636934
T., Zeng, Tao; Y., Zhou, Yan; J., Zheng, Jingwen; X., Zhuo, Xin; L., Zhu, Ling; L., Wan, Lihong	Zeng, Tao (58775213700); Zhou, Yan (57190373107); Zheng, Jingwen (58127605700); Zhuo, Xin (59135072600); Zhu, Ling (56321167200); Wan, Lihong (26647838100)	58775213700; 57190373107; 58127605700; 59135072600; 56321167200; 26647838100	Rosmarinic acid alleviates septic acute respiratory distress syndrome in mice by suppressing the bronchial epithelial RAS-mediated ferroptosis	2024	International Immunopharmacology	135		112304			0	10	10.1016/j.intimp.2024.112304	https://www.scopus.com/inward/record.uri?eid=2-s2.0-85193603706&doi=10.1016%2Fj.intimp.2024.112304&partnerID=40&md5=a363ac1e5d40e8c47e92c3918393a057	Article	Final	All Open Access; Hybrid Gold Open Access	Scopus	2-s2.0-85193603706
J., Zhan, Jiayi; J., Chen, Junming; L., Deng, Liyan; Y., Lu, Yining; L., Luo, Lianxiang	Zhan, Jiayi (58916390200); Chen, Junming (58916098700); Deng, Liyan (58021138700); Lu, Yining (58916098800); Luo, Lianxiang (57193721943)	58916390200; 58916098700; 58021138700; 58916098800; 57193721943	Exploring the ferroptosis-related gene lipocalin 2 as a potential biomarker for sepsis-induced acute respiratory distress syndrome based on machine learning	2024	Biochimica et Biophysica Acta - Molecular Basis of Disease	1870	4	167101			0	9	10.1016/j.bbadis.2024.167101	https://www.scopus.com/inward/record.uri?eid=2-s2.0-85186498920&doi=10.1016%2Fj.bbadis.2024.167101&partnerID=40&md5=233fe7a48b8a946b93722e927f851898	Article	Final		Scopus	2-s2.0-85186498920
Z., Chen, Zemin; H., Tang, Haixiong; S., Gan, Sudan; C., Yang, Changyun; S., Li, Shiyue; J., Li, Jing; L., Yao, Lihong	Chen, Zemin (58733788000); Tang, Haixiong (55683373800); Gan, Sudan (58733061700); Yang, Changyun (58734521400); Li, Shiyue (55780805100); Li, Jing (56843945000); Yao, Lihong (56563426400)	58733788000; 55683373800; 58733061700; 58734521400; 55780805100; 56843945000; 56563426400	Ferroptosis mediates airway epithelial E-cadherin dysfunction in LPS-induced acute lung injury	2024	Pulmonary Pharmacology and Therapeutics	84		102284			0	7	10.1016/j.pupt.2023.102284	https://www.scopus.com/inward/record.uri?eid=2-s2.0-85181232089&doi=10.1016%2Fj.pupt.2023.102284&partnerID=40&md5=b31caeb195b862ab8482c39ae1d9180f	Article	Final		Scopus	2-s2.0-85181232089
X., Hu, Xin'gang; W., Zhang, Wenwen; Y., Jiang, Yafen; J., Zhang, Jie; Z., Liu, Zhida; C., Tian, Cuijie; X., Wang, Xuelin; J., Cheng, Jianjian	Hu, Xin'gang (55496356900); Zhang, Wenwen (57224623795); Jiang, Yafen (58927480700); Zhang, Jie (58927607800); Liu, Zhida (57192184035); Tian, Cuijie (57189699273); Wang, Xuelin (57371407700); Cheng, Jianjian (57204428429)	55496356900; 57224623795; 58927480700; 58927607800; 57192184035; 57189699273; 57371407700; 57204428429	Impact of extracorporeal carbon dioxide removal combined with continuous renal replacement therapy on diaphragmatic function in patients with acute respiratory distress syndrome; 体外二氧化碳清除联合连续性肾脏替代治疗对急性呼吸窘迫综合征患者膈肌功能的影响	2024	Chinese Critical Care Medicine	36	2		147	151	0	1	10.3760/cma.j.cn121430-20231207-01063	https://www.scopus.com/inward/record.uri?eid=2-s2.0-85187200742&doi=10.3760%2Fcma.j.cn121430-20231207-01063&partnerID=40&md5=fdb3ddce5d689c1696a3380eac8f13be	Article	Final		Scopus	2-s2.0-85187200742
X., Chen, Xu; J., Shen, Jiapan; X., Jiang, Xueqin; M., Pan, Min; S., Chang, Shuang; J., Li, Juanjuan; L., Wang, Lei; M., Miao, Manli; X., Feng, Xiaoxia; L., Zhang, Ling	Chen, Xu (57222019940); Shen, Jiapan (58938046200); Jiang, Xueqin (23967612000); Pan, Min (57216750425); Chang, Shuang (58938478700); Li, Juanjuan (57206967796); Wang, Lei (59391645200); Miao, Manli (57212383797); Feng, Xiaoxia (58937619500); Zhang, Ling (57226542931)	57222019940; 58938046200; 23967612000; 57216750425; 58938478700; 57206967796; 59391645200; 57212383797; 58937619500; 57226542931	Characterization of dipyridamole as a novel ferroptosis inhibitor and its therapeutic potential in acute respiratory distress syndrome management	2024	Theranostics	14	18		6947	6968	0	7	10.7150/thno.102318	https://www.scopus.com/inward/record.uri?eid=2-s2.0-85207959567&doi=10.7150%2Fthno.102318&partnerID=40&md5=ac875f811ffa5e05c674c8b5bf6e05a7	Article	Final	All Open Access; Gold Open Access	Scopus	2-s2.0-85207959567
M., Lin, Miao; W., Xie, Weixi; D., Xiong, Dayan; S., Tang, Siyuan; X., Huang, Xiaoting; L., Deng, Lang; L., Huang, Lei; X., Zhang, Xiaohua; T., Zhou, Tingting; R., Qian, Rui	Lin, Miao (57226154418); Xie, Weixi (57226142372); Xiong, Dayan (57435272100); Tang, Siyuan (13105767800); Huang, Xiaoting (56637218100); Deng, Lang (57434724200); Huang, Lei (58565066500); Zhang, Xiaohua (58566260900); Zhou, Tingting (57226156951); Qian, Rui (58668405000)	57226154418; 57226142372; 57435272100; 13105767800; 56637218100; 57434724200; 58565066500; 58566260900; 57226156951; 58668405000	Cyasterone ameliorates sepsis-related acute lung injury via AKT (Ser473)/GSK3β (Ser9)/Nrf2 pathway	2023	Chinese Medicine (United Kingdom)	18	1	136			0	8	10.1186/s13020-023-00837-2	https://www.scopus.com/inward/record.uri?eid=2-s2.0-85175014585&doi=10.1186%2Fs13020-023-00837-2&partnerID=40&md5=a619be3b14080cc7d09e4f35cb1a9d24	Article	Final	All Open Access; Gold Open Access; Green Final Open Access; Green Open Access	Scopus	2-s2.0-85175014585
B., Francesco, Bellanti; S., Kasperczyk, Slawomir; A., Kasperczyk, Aleksandra; M., Dobrakowski, Michał; G., Pacilli, Gabriella; G., Vurchio, Giuseppina; A., Maddalena, Alessandro; S., Quiete, Stefano; A., Lo Buglio, Aurelio; C., Capurso, Cristiano	Francesco, Bellanti (57218136564); Kasperczyk, Slawomir (55975391500); Kasperczyk, Aleksandra (6603338238); Dobrakowski, Michał (57203028360); Pacilli, Gabriella (58476418400); Vurchio, Giuseppina (58475717000); Maddalena, Alessandro (58476879900); Quiete, Stefano (57246546200); Lo Buglio, Aurelio (57190861382); Capurso, Cristiano (6603670077)	57218136564; 55975391500; 6603338238; 57203028360; 58476418400; 58475717000; 58476879900; 57246546200; 57190861382; 6603670077	Alteration of circulating redox balance in coronavirus disease-19-induced acute respiratory distress syndrome	2023	Journal of Intensive Care	11	1	30			0	4	10.1186/s40560-023-00679-y	https://www.scopus.com/inward/record.uri?eid=2-s2.0-85164189891&doi=10.1186%2Fs40560-023-00679-y&partnerID=40&md5=d365f52312be87fa64fe43aa5b7aa0ce	Article	Final	All Open Access; Gold Open Access; Green Accepted Open Access; Green Open Access	Scopus	2-s2.0-85164189891
A., Ma, Aijia; Z., Feng, Zhongxue; L., Yang, Li; Q., Wu, Qin; H., Xiong, Huaiyu; M., Dong, Meiling; J., Cheng, Jiangli; Z., Wang, Zhenling; J., Yang, Jing; Y., Kang, Yan	Ma, Aijia (57200173899); Feng, Zhongxue (57202871518); Yang, Li (57219401876); Wu, Qin (55982030600); Xiong, Huaiyu (57210561852); Dong, Meiling (57195837001); Cheng, Jiangli (57193843439); Wang, Zhenling (57218257384); Yang, Jing (56231091900); Kang, Yan (35169843000)	57200173899; 57202871518; 57219401876; 55982030600; 57210561852; 57195837001; 57193843439; 57218257384; 56231091900; 35169843000	Ferroptosis-related signature and immune infiltration characterization in acute lung injury/acute respiratory distress syndrome	2023	Respiratory Research	24	1	154			0	25	10.1186/s12931-023-02429-y	https://www.scopus.com/inward/record.uri?eid=2-s2.0-85161969079&doi=10.1186%2Fs12931-023-02429-y&partnerID=40&md5=c217ce0479711a956703a4b3e77f37f3	Article	Final	All Open Access; Gold Open Access; Green Final Open Access; Green Open Access	Scopus	2-s2.0-85161969079
Y., Deng, Yu; K., Lai, Kai; Z., Lu, Zilong; M., Gao, Minglang; N., Li, Ning; Q., Geng, Qing	Deng, Yu (57396276400); Lai, Kai (57744653800); Lu, Zilong (57211436848); Gao, Minglang (57890851500); Li, Ning (57195737943); Geng, Qing (38662400600)	57396276400; 57744653800; 57211436848; 57890851500; 57195737943; 38662400600	Sitagliptin ameliorates lipopolysaccharide⁃induced acute lung injury by inhibiting ferroptosis; 西 格 列 汀 通 过 抑 制 铁 死 亡 改 善 脂 多 糖 诱 导 的急 性 肺 损 伤	2023	Medical Journal of Wuhan University	44	11		1303	1310	0	0	10.14188/j.1671-8852.2023.0336	https://www.scopus.com/inward/record.uri?eid=2-s2.0-85181488151&doi=10.14188%2Fj.1671-8852.2023.0336&partnerID=40&md5=16cbb5dc7a35b96bc2e6d34a589b3b9b	Article	Final		Scopus	2-s2.0-85181488151
M., Ghasemzadeh Rahbardar, Mahboobeh; B.M., Razavi, Bibi Marjan; K., Naraki, Karim; H., Hosseinzadeh, Hossein	Ghasemzadeh Rahbardar, Mahboobeh (36105975700); Razavi, Bibi Marjan (25221890200); Naraki, Karim (57194244103); Hosseinzadeh, Hossein (56212454800)	36105975700; 25221890200; 57194244103; 56212454800	Therapeutic effects of minocycline on oleic acid-induced acute respiratory distress syndrome (ARDS) in rats	2023	Naunyn-Schmiedeberg's Archives of Pharmacology	396	11		3233	3242	0	8	10.1007/s00210-023-02532-3	https://www.scopus.com/inward/record.uri?eid=2-s2.0-85160416703&doi=10.1007%2Fs00210-023-02532-3&partnerID=40&md5=db375af646636f1aa434a28105fdf7d7	Article	Final	All Open Access; Bronze Open Access; Green Final Open Access; Green Open Access	Scopus	2-s2.0-85160416703
H., Zhang, Hong; J., Zeng, Jun; J., Li, Jiankang; H., Gong, Huankai; M., Chen, Meiling; Q., Li, Quan; S., Liu, Shengxing; S., Luo, Shanjun; H., Dong, Huanxiang; Y., Xu, Yingke	Zhang, Hong (57219386418); Zeng, Jun (36927457100); Li, Jiankang (57435215700); Gong, Huankai (57982245800); Chen, Meiling (57473723800); Li, Quan (57836366600); Liu, Shengxing (57221250167); Luo, Shanjun (57473861000); Dong, Huanxiang (58292424200); Xu, Yingke (58292424300)	57219386418; 36927457100; 57435215700; 57982245800; 57473723800; 57836366600; 57221250167; 57473861000; 58292424200; 58292424300	Sivelestat sodium attenuates acute lung injury by inhibiting jnk/nf-κΒ and activating nrf2/ho-1 signaling pathways	2023	Biomolecules and Biomedicine	23	3		457	470	0	20	10.17305/bb.2022.8549	https://www.scopus.com/inward/record.uri?eid=2-s2.0-85160397422&doi=10.17305%2Fbb.2022.8549&partnerID=40&md5=5374ddd129500a77d6e17d45c7283d9b	Article	Final	All Open Access; Gold Open Access; Green Final Open Access; Green Open Access	Scopus	2-s2.0-85160397422
M.D., Samsonia, M. D.; M.A., Kandelaki, M. A.; N.G., Baratashvili, N. G.; L.G., Gvaramia, L. G.	Samsonia, M. D. (26635995400); Kandelaki, M. A. (22634702400); Baratashvili, N. G. (58635604600); Gvaramia, L. G. (57409706600)	26635995400; 22634702400; 58635604600; 57409706600	NEUROPROTECTIVE AND ANTIOXIDANT POTENTIAL OF MONTELUKAST-ACETYLCYSTEINE COMBINATION THERAPY FOR BRAIN PROTECTION IN PATIENTS WITH COVID-19 INDUCED PNEUMONIA; reziume montelukastis da acetilcisteinis kombinirebuli Terapiis neiroproteqtoruli da antioqsidanturi potenciali (Tavis tvinis iSemiisgan dacvis mizniT) COVID-19-iT gamowveuli virusuli pnevmoniis mqone pacientebSi; НЕЙРОПРОТЕКТОРНЫЙ И АНТИОКС…	2023	Georgian Medical News	335	2		111	118	0	4		https://www.scopus.com/inward/record.uri?eid=2-s2.0-85170265880&partnerID=40&md5=09b449e535a624858d538b733c04626d	Article	Final		Scopus	2-s2.0-85170265880
S., Wang, Shuibang; B.G., Baldi, B. G.	Wang, Shuibang (7410335635); Baldi, B. G. (16240768700)	7410335635; 16240768700	Editorial: Reviews in pulmonary medicine 2022	2023	Frontiers in Medicine	10		1296581			0	0	10.3389/fmed.2023.1296581	https://www.scopus.com/inward/record.uri?eid=2-s2.0-85180248189&doi=10.3389%2Ffmed.2023.1296581&partnerID=40&md5=3d1e59529828dbc603dc903fc64332e1	Editorial	Final	All Open Access; Gold Open Access; Green Final Open Access; Green Open Access	Scopus	2-s2.0-85180248189
Y., An, Y.; H., Zhang, Haiming; R., Wang, Rui; Y., Shen, Yinfeng; J., Zhao, Jingling; Y., Zou, Yinshui; G., Wang, Guangzhi	An, Y. (58704084300); Zhang, Haiming (57196346750); Wang, Rui (58930524000); Shen, Yinfeng (35215986500); Zhao, Jingling (56127188800); Zou, Yinshui (58658798700); Wang, Guangzhi (58430231600)	58704084300; 57196346750; 58930524000; 35215986500; 56127188800; 58658798700; 58430231600	Biomarkers, signaling pathways, and programmed cell death in acute lung injury and its treatment with Traditional Chinese Medicine: a narrative review	2023	European Review for Medical and Pharmacological Sciences	27	21		10157	10170	0	8	10.26355/eurrev_202311_34292	https://www.scopus.com/inward/record.uri?eid=2-s2.0-85177442262&doi=10.26355%2Feurrev_202311_34292&partnerID=40&md5=a0f697bb20af4220294fdaae46a7d90c	Article	Final		Scopus	2-s2.0-85177442262
B., Liu, Bo; Y., Li, Yan; J., Xiang, Jinying; Y., Li, Yuehan; M., Zhou, Mi; Y., Ren, Yinying; Z., Fu, Zhou; F., Ding, Fengxia	Liu, Bo (57191514444); Li, Yan (59789745500); Xiang, Jinying (58552830500); Li, Yuehan (58855302500); Zhou, Mi (57206255161); Ren, Yinying (58552830700); Fu, Zhou (35277137900); Ding, Fengxia (56693767100)	57191514444; 59789745500; 58552830500; 58855302500; 57206255161; 58552830700; 35277137900; 56693767100	Significance of Pyroptosis in Immunoregulation and Prognosis of Patients with Acute Respiratory Distress Syndrome: Evidence from RNA-Seq of Alveolar Macrophages	2023	Journal of Inflammation Research	16			3547	3562	0	7	10.2147/JIR.S422585	https://www.scopus.com/inward/record.uri?eid=2-s2.0-85168984762&doi=10.2147%2FJIR.S422585&partnerID=40&md5=df32e731f43ed2d47b801e94e0f2e366	Article	Final	All Open Access; Gold Open Access; Green Final Open Access; Green Open Access	Scopus	2-s2.0-85168984762
Y., Wu, Yuxuan; H., Sun, Hao; L., Qin, Lianju; X., Zhang, Xiaomin; H., Zhou, Hao; Y., Wang, Yao; L., Wang, Lumin; M., Li, Meng; J., Liu, Jiayin; J., Zhang, Jinsong	Wu, Yuxuan (57208272806); Sun, Hao (56920942700); Qin, Lianju (55787033200); Zhang, Xiaomin (36189945500); Zhou, Hao (57193530196); Wang, Yao (59226589000); Wang, Lumin (57423716400); Li, Meng (57658598600); Liu, Jiayin (57196291738); Zhang, Jinsong (56137115200)	57208272806; 56920942700; 55787033200; 36189945500; 57193530196; 59226589000; 57423716400; 57658598600; 57196291738; 56137115200	Human amnion-derived mesenchymal stem cells attenuate acute lung injury in two different acute lung injury mice models	2023	Frontiers in Pharmacology	14		1149659			0	4	10.3389/fphar.2023.1149659	https://www.scopus.com/inward/record.uri?eid=2-s2.0-85163772711&doi=10.3389%2Ffphar.2023.1149659&partnerID=40&md5=07ad57d7cea8c3b0ffb3b12f52d1f67f	Article	Final	All Open Access; Gold Open Access; Green Final Open Access; Green Open Access	Scopus	2-s2.0-85163772711
A.B., Rowaiye, Adekunle Babajide; A.J., Ogugua, Akwoba Joseph; D., Bur, Doofan; T., Wood, Timipanipiri; Z., Labbo, Zainab; C., Chukwu, Chimaobi; F.J., Afolabi, Femi Johnson; E.J., Nwonu, Ezinne Janefrances; T., Agbalalaha, Tarimoboere	Rowaiye, Adekunle Babajide (57216390084); Ogugua, Akwoba Joseph (57184380500); Bur, Doofan (57221342498); Wood, Timipanipiri (58247125800); Labbo, Zainab (58247125900); Chukwu, Chimaobi (57731634700); Afolabi, Femi Johnson (57191636635); Nwonu, Ezinne Janefrances (57880503100); Agbalalaha, Tarimoboere (58478206800)	57216390084; 57184380500; 57221342498; 58247125800; 58247125900; 57731634700; 57191636635; 57880503100; 58478206800	The Lingzhi or Reishi Medicinal Mushroom Ganoderma lucidum (Agaricomycetes) Can Combat Cytokine Storm and Other COVID-19 Related Pathologies: A Review	2023	International Journal of Medicinal Mushrooms	25	5		1	15	0	8	10.1615/IntJMedMushrooms.2023048109	https://www.scopus.com/inward/record.uri?eid=2-s2.0-85159150170&doi=10.1615%2FIntJMedMushrooms.2023048109&partnerID=40&md5=0830a576d88b5ead03c3ee0b03288d2c	Article	Final		Scopus	2-s2.0-85159150170
W., Zhu, Wenfang; Y., Zhang, Yiwen; Y., Wang, Yinghong	Zhu, Wenfang (58044403600); Zhang, Yiwen (57217062267); Wang, Yinghong (56966803200)	58044403600; 57217062267; 56966803200	Immunotherapy strategies and prospects for acute lung injury: Focus on immune cells and cytokines	2022	Frontiers in Pharmacology	13		1103309			0	31	10.3389/fphar.2022.1103309	https://www.scopus.com/inward/record.uri?eid=2-s2.0-85145722876&doi=10.3389%2Ffphar.2022.1103309&partnerID=40&md5=bd5328b7bc34578a0606c5a47064300e	Review	Final	All Open Access; Gold Open Access; Green Accepted Open Access; Green Open Access	Scopus	2-s2.0-85145722876
C.R., McClintock, Catherine R.; N., Mulholland, Niamh; A.D., Krasnodembskaya, Anna D.	McClintock, Catherine R. (58036231000); Mulholland, Niamh (58036735700); Krasnodembskaya, Anna D. (36739120600)	58036231000; 58036735700; 36739120600	Biomarkers of mitochondrial dysfunction in acute respiratory distress syndrome: A systematic review and meta-analysis	2022	Frontiers in Medicine	9		1011819			0	14	10.3389/fmed.2022.1011819	https://www.scopus.com/inward/record.uri?eid=2-s2.0-85145161466&doi=10.3389%2Ffmed.2022.1011819&partnerID=40&md5=d723fa158627eb7d5f062dad89cb2ccd	Review	Final	All Open Access; Gold Open Access; Green Final Open Access; Green Open Access	Scopus	2-s2.0-85145161466
F., Terzi̇, Funda; B., Demirci, Beste; I., Cınar, Irfan; M., Alhilal, Mohammad; H.S., Erol, Hüseyin Serkan	Terzi̇, Funda (57196002965); Demirci, Beste (57266858700); Cınar, Irfan (55355223200); Alhilal, Mohammad (57214259186); Erol, Hüseyin Serkan (56123616900)	57196002965; 57266858700; 55355223200; 57214259186; 56123616900	Effects of tocilizumab and dexamethasone on the downregulation of proinflammatory cytokines and upregulation of antioxidants in the lungs in oleic acid-induced ARDS	2022	Respiratory Research	23	1	249			0	17	10.1186/s12931-022-02172-w	https://www.scopus.com/inward/record.uri?eid=2-s2.0-85138206381&doi=10.1186%2Fs12931-022-02172-w&partnerID=40&md5=140fa56d5f1d756219e4909df3a2d998	Article	Final	All Open Access; Gold Open Access; Green Final Open Access; Green Open Access	Scopus	2-s2.0-85138206381
Q., Dhlamini, Qhaweni; W., Wang, Wei; G., Feng, Guifeng; A., Chen, Aiping; L., Chong, Lei; X., Li, Xue; Q., Li, Quan; J., Wu, Jin; D., Zhou, Depu; J., Wang, Jie	Dhlamini, Qhaweni (57224463849); Wang, Wei (56957891600); Feng, Guifeng (57402962600); Chen, Aiping (57403826300); Chong, Lei (55315443400); Li, Xue (57224205971); Li, Quan (57767462600); Wu, Jin (57208256361); Zhou, Depu (57194210467); Wang, Jie (57191491500)	57224463849; 56957891600; 57402962600; 57403826300; 55315443400; 57224205971; 57767462600; 57208256361; 57194210467; 57191491500	FGF1 alleviates LPS-induced acute lung injury via suppression of inflammation and oxidative stress	2022	Molecular Medicine	28	1	73			0	79	10.1186/s10020-022-00502-8	https://www.scopus.com/inward/record.uri?eid=2-s2.0-85133010100&doi=10.1186%2Fs10020-022-00502-8&partnerID=40&md5=497440996f45b67b81bea9f9e5e3b9e4	Article	Final	All Open Access; Gold Open Access; Green Accepted Open Access; Green Open Access	Scopus	2-s2.0-85133010100
S., A, Sudheer; M., G, Meera	A, Sudheer (57996604300); G, Meera (57996604400)	57996604300; 57996604400	Ayurvedic management through telemedicine of covid hypoxia non-dependent of oxygen support in a patient with chest CT score of 18/25- A case report	2022	Journal of Ayurveda and Integrative Medicine	13	4	100660			0	2	10.1016/j.jaim.2022.100660	https://www.scopus.com/inward/record.uri?eid=2-s2.0-85143530614&doi=10.1016%2Fj.jaim.2022.100660&partnerID=40&md5=20196a1bbe260bdc77ff0b8bbe8f02be	Article	Final	All Open Access; Gold Open Access; Green Final Open Access; Green Open Access	Scopus	2-s2.0-85143530614
S.H., Audi, Said Halim; P., Taheri, Pardis; M., Zhao, Ming; K., Hu, Kurt; E.R., Jacobs, Elizabeth R.; A.V., Clough, Anne V.	Audi, Said Halim (7003267593); Taheri, Pardis (57430306200); Zhao, Ming (7403534728); Hu, Kurt (57217072208); Jacobs, Elizabeth R. (34975087400); Clough, Anne V. (7006120455)	7003267593; 57430306200; 7403534728; 57217072208; 34975087400; 7006120455	In vivo molecular imaging stratifies rats with different susceptibilities to hyperoxic acute lung injury	2022	American Journal of Physiology - Lung Cellular and Molecular Physiology	323	4		L410	L422	0	4	10.1152/ajplung.00126.2022	https://www.scopus.com/inward/record.uri?eid=2-s2.0-85138459754&doi=10.1152%2Fajplung.00126.2022&partnerID=40&md5=652daaebba1352907ddf1cdd500e7e92	Article	Final	All Open Access; Green Final Open Access; Green Open Access	Scopus	2-s2.0-85138459754
A., Fakharian, Atefeh; M.S., Mirenayat, Maryam Sadat; F., Ferdowsi, Fatemeh; S.B., Mirtajani, Sead Bashir; V., Khalili, Vajihozaman; R., Zahiri, Reyhaneh; H., Jamaati, Hamidreza	Fakharian, Atefeh (36113080400); Mirenayat, Maryam Sadat (55624896600); Ferdowsi, Fatemeh (57914069000); Mirtajani, Sead Bashir (57191909008); Khalili, Vajihozaman (57913645600); Zahiri, Reyhaneh (57225146849); Jamaati, Hamidreza (7801446806)	36113080400; 55624896600; 57914069000; 57191909008; 57913645600; 57225146849; 7801446806	The Efficacy of Methylprednisolone in Clinical Manifestations, Inflammatory Biomarkers, and Antioxidant Changes in the COVID-19 Patients	2022	Archives of Clinical Infectious Diseases	17	4	e129799			0	2	10.5812/archcid-129799	https://www.scopus.com/inward/record.uri?eid=2-s2.0-85139102971&doi=10.5812%2Farchcid-129799&partnerID=40&md5=50b31c7121153eb113d0f7524a74a320	Article	Final	All Open Access; Gold Open Access	Scopus	2-s2.0-85139102971
K.S., Wildi, Karin S.; M.J.P., Bouquet, Mahe Jeannine Patricia; C., Ainola, Carmen; S.A., Livingstone, Samantha Annie; S.M., Colombo, Sebastiano Maria; S., Heinsar, Silver; N., Sato, Noriko; K., Sato, Kei; E.S., Wilson, Emily Susan; G., Abbate, Gabriella	Wildi, Karin S. (37102901200); Bouquet, Mahe Jeannine Patricia (57208273881); Ainola, Carmen (57223609153); Livingstone, Samantha Annie (57216973476); Colombo, Sebastiano Maria (56954547300); Heinsar, Silver (57204571370); Sato, Noriko (57300931200); Sato, Kei (59712503700); Wilson, Emily Susan (57301074200); Abbate, Gabriella (57216974036)	37102901200; 57208273881; 57223609153; 57216973476; 56954547300; 57204571370; 57300931200; 59712503700; 57301074200; 57216974036	Differential Protein Expression among Two Different Ovine ARDS Phenotypes—A Preclinical Randomized Study	2022	Metabolites	12	7	655			0	1	10.3390/metabo12070655	https://www.scopus.com/inward/record.uri?eid=2-s2.0-85136205364&doi=10.3390%2Fmetabo12070655&partnerID=40&md5=0d559f280e5cf7f89e3fd330755af030	Article	Final	All Open Access; Gold Open Access; Green Final Open Access; Green Open Access	Scopus	2-s2.0-85136205364
A., Patangrao Renushe, Akshata; B., Anilkumar, Banothu; K., Kumar Bharani, Kala; L., Mekala, Lakshman; J., Mahesh Kumar, Jerald; D., Neeradi, Dinesh; D., Durga Veera Hanuman, Donga; A., Gadige, Ambica; A., Khurana, Amit	Patangrao Renushe, Akshata (57604477800); Anilkumar, Banothu (36183324800); Kumar Bharani, Kala (57605738000); Mekala, Lakshman (57211992031); Mahesh Kumar, Jerald (59157876200); Neeradi, Dinesh (57604477900); Durga Veera Hanuman, Donga (57605483300); Gadige, Ambica (57605738100); Khurana, Amit (56400453800)	57604477800; 36183324800; 57605738000; 57211992031; 59157876200; 57604477900; 57605483300; 57605738100; 56400453800	Vincamine, an active constituent of Vinca rosea ameliorates experimentally induced acute lung injury in Swiss albino mice through modulation of Nrf-2/NF-κB signaling cascade	2022	International Immunopharmacology	108		108773			0	21	10.1016/j.intimp.2022.108773	https://www.scopus.com/inward/record.uri?eid=2-s2.0-85128515873&doi=10.1016%2Fj.intimp.2022.108773&partnerID=40&md5=724c8f072d39dc775d8a0ccd48a1664a	Article	Final		Scopus	2-s2.0-85128515873
Y., Jiao, Yang; C., Yong, Chaoying; R., Zhang, Renzi; D., Qi, Di; D., Wang, Daoxin	Jiao, Yang (57667700200); Yong, Chaoying (57667700100); Zhang, Renzi (57226040903); Qi, Di (56401549900); Wang, Daoxin (55753282200)	57667700200; 57667700100; 57226040903; 56401549900; 55753282200	Hepcidin Alleviates LPS-Induced ARDS by Regulating the Ferritin-Mediated Suppression of Ferroptosis	2022	Shock	57	6		274	281	0	25	10.1097/SHK.0000000000001941	https://www.scopus.com/inward/record.uri?eid=2-s2.0-85133103306&doi=10.1097%2FSHK.0000000000001941&partnerID=40&md5=712fb68a47013feb4477400109ad2e5b	Article	Final	All Open Access; Hybrid Gold Open Access	Scopus	2-s2.0-85133103306
V., Ruggiero, Valentina; R.P., Aquino, Rita Patrizia; P., Del Gaudio, Pasquale; P., Campiglia, Pietro; P., Russo, Paola	Ruggiero, Valentina (57726962800); Aquino, Rita Patrizia (7006620872); Del Gaudio, Pasquale (55898038300); Campiglia, Pietro (6603015488); Russo, Paola (57191567298)	57726962800; 7006620872; 55898038300; 6603015488; 57191567298	Post-COVID Syndrome: The Research Progress in the Treatment of Pulmonary sequelae after COVID-19 Infection	2022	Pharmaceutics	14	6	1135			0	17	10.3390/pharmaceutics14061135	https://www.scopus.com/inward/record.uri?eid=2-s2.0-85131306667&doi=10.3390%2Fpharmaceutics14061135&partnerID=40&md5=06c836f419430202d4df87dd0c6c322d	Review	Final	All Open Access; Gold Open Access; Green Final Open Access; Green Open Access	Scopus	2-s2.0-85131306667
D., Hao, Danli; Y., Wang, Yajie; J., Yang, Jiaying; R., Xie, Ran; L., Jia, Lingyu; J., Cheng, Jintang; H., Ma, Hai; J., Tian, Jixiang; S., Guo, Shanshan; T., Liu, Ting	Hao, Danli (57210469668); Wang, Yajie (57207002178); Yang, Jiaying (57223020312); Xie, Ran (57205139089); Jia, Lingyu (57736136000); Cheng, Jintang (57191980612); Ma, Hai (56888132500); Tian, Jixiang (57735808000); Guo, Shanshan (57701016300); Liu, Ting (55727717000)	57210469668; 57207002178; 57223020312; 57205139089; 57736136000; 57191980612; 56888132500; 57735808000; 57701016300; 55727717000	The Alleviation of LPS-Induced Murine Acute Lung Injury by GSH-Mediated PEGylated Artesunate Prodrugs	2022	Frontiers in Pharmacology	13		860492			0	11	10.3389/fphar.2022.860492	https://www.scopus.com/inward/record.uri?eid=2-s2.0-85131736824&doi=10.3389%2Ffphar.2022.860492&partnerID=40&md5=ee9ca911b97aaf35e805c3f6aaaf019c	Article	Final	All Open Access; Gold Open Access; Green Final Open Access; Green Open Access	Scopus	2-s2.0-85131736824
H., Qu, Haixin; E., Yuan, Erwei; W., Guo, Weiping; Y., Zhang, Yajing; W., Ma, Wenxia; D., Wu, Dan	Qu, Haixin (57352601800); Yuan, Erwei (57211067915); Guo, Weiping (57211073292); Zhang, Yajing (58308488900); Ma, Wenxia (58308922000); Wu, Dan (58308922100)	57352601800; 57211067915; 57211073292; 58308488900; 58308922000; 58308922100	Improvement effect of luteolin on acute respiratory distress syndrome by inhibiting ROS/TXNIP/NLRP3 signaling pathway activation in mice; 木犀草素抑制 ROS/TXNIP/NLRP3 信号通路激活对小鼠急性呼吸窘迫综合征的改善作用	2022	Journal of Jilin University Medicine Edition	48	3		676	683	0	1	10.13481/j.1671-587X.20220316	https://www.scopus.com/inward/record.uri?eid=2-s2.0-85161414807&doi=10.13481%2Fj.1671-587X.20220316&partnerID=40&md5=bd01491a1d4992e466031501f39232ad	Article	Final		Scopus	2-s2.0-85161414807
X., Liu, Xin; J., Zhang, Junqiang; W., Xie, Wang	Liu, Xin (59448497100); Zhang, Junqiang (57455730400); Xie, Wang (56441966200)	59448497100; 57455730400; 56441966200	The role of ferroptosis in acute lung injury	2022	Molecular and Cellular Biochemistry	477	5		1453	1461	0	69	10.1007/s11010-021-04327-7	https://www.scopus.com/inward/record.uri?eid=2-s2.0-85124729097&doi=10.1007%2Fs11010-021-04327-7&partnerID=40&md5=1015a5e04d05046bd13466727e554236	Review	Final		Scopus	2-s2.0-85124729097
Y., Zhang, Yiguo; L., Zheng, Li; H., Deng, Huimin; D., Feng, Di; S., Hu, Song; L., Zhu, Lina; W., Xu, Wenting; W., Zhou, Wenyu; Y., Wang, Yu; K., Min, Keting	Zhang, Yiguo (57222871888); Zheng, Li (57216766566); Deng, Huimin (57216771057); Feng, Di (57190075252); Hu, Song (57224194450); Zhu, Lina (57216765328); Xu, Wenting (59283361300); Zhou, Wenyu (57465711500); Wang, Yu (57222199424); Min, Keting (57226481302)	57222871888; 57216766566; 57216771057; 57190075252; 57224194450; 57216765328; 59283361300; 57465711500; 57222199424; 57226481302	Electroacupuncture Alleviates LPS-Induced ARDS Through α7 Nicotinic Acetylcholine Receptor-Mediated Inhibition of Ferroptosis	2022	Frontiers in Immunology	13		832432			0	56	10.3389/fimmu.2022.832432	https://www.scopus.com/inward/record.uri?eid=2-s2.0-85125195925&doi=10.3389%2Ffimmu.2022.832432&partnerID=40&md5=8bb087c185e513a69a5b30f374e8fc37	Article	Final	All Open Access; Gold Open Access; Green Final Open Access; Green Open Access	Scopus	2-s2.0-85125195925
S.H., Audi, Said Halim; E.R., Jacobs, Elizabeth R.; P., Taheri, Pardis; S., Ganesh, Swetha; A.V., Clough, Anne V.	Audi, Said Halim (7003267593); Jacobs, Elizabeth R. (34975087400); Taheri, Pardis (57430306200); Ganesh, Swetha (57430381700); Clough, Anne V. (7006120455)	7003267593; 34975087400; 57430306200; 57430381700; 7006120455	ASSESSMENT OF PROTECTION OFFERED BY THE NRF2 PATHWAY AGAINST HYPEROXIA-INDUCED ACUTE LUNG INJURY IN NRF2 KNOCKOUT RATS	2022	Shock	57	2		274	280	0	13	10.1097/SHK.0000000000001882	https://www.scopus.com/inward/record.uri?eid=2-s2.0-85123651681&doi=10.1097%2FSHK.0000000000001882&partnerID=40&md5=0eace62a49a0da115c2de6a262ef2d0d	Article	Final	All Open Access; Green Accepted Open Access; Green Open Access	Scopus	2-s2.0-85123651681
Y., Wang, Yuming; F., Gong, Fangchen; X., Qi, Xing; Y., Zheng, Yanjun; X., Zheng, Xiangtao; Y., Chen, Ying; Z., Yang, Zhitao; Q., Ye, Qing; E., Mao, Enqiang; E., Chen, Erzhen	Wang, Yuming (57211162452); Gong, Fangchen (56677322200); Qi, Xing (55336728000); Zheng, Yanjun (55713142900); Zheng, Xiangtao (57226281228); Chen, Ying (58433236700); Yang, Zhitao (56053210600); Ye, Qing (57202885390); Mao, Enqiang (59662784800); Chen, Erzhen (14219049800)	57211162452; 56677322200; 55336728000; 55713142900; 57226281228; 58433236700; 56053210600; 57202885390; 59662784800; 14219049800	Mucin 1 Inhibits Ferroptosis and Sensitizes Vitamin e to Alleviate Sepsis-Induced Acute Lung Injury through GSK3 β /Keap1-Nrf2-GPX4 Pathway	2022	Oxidative Medicine and Cellular Longevity	2022		2405943			0	50	10.1155/2022/2405943	https://www.scopus.com/inward/record.uri?eid=2-s2.0-85135212346&doi=10.1155%2F2022%2F2405943&partnerID=40&md5=49fef9a2b893f88f379bfbf108b9dbe6	Article	Final	All Open Access; Green Accepted Open Access; Green Open Access; Hybrid Gold Open Access	Scopus	2-s2.0-85135212346
F., Izadparast, Faezeh; B., Riahi-Zajani, Bamdad; F., Yarmohammadi, Fatemeh; A.W., Hayes, A. Wallace; G., Karimi, G.	Izadparast, Faezeh (57804618200); Riahi-Zajani, Bamdad (57804364000); Yarmohammadi, Fatemeh (57192558191); Hayes, A. Wallace (57210895624); Karimi, G. (57190702576)	57804618200; 57804364000; 57192558191; 57210895624; 57190702576	Protective effect of berberine against LPS-induced injury in the intestine: a review	2022	Cell Cycle	21	22		2365	2378	0	66	10.1080/15384101.2022.2100682	https://www.scopus.com/inward/record.uri?eid=2-s2.0-85134208995&doi=10.1080%2F15384101.2022.2100682&partnerID=40&md5=a14d0bfbcfa04fb218c383f7600c1b73	Review	Final	All Open Access; Bronze Open Access; Green Final Open Access; Green Open Access	Scopus	2-s2.0-85134208995
D., Qi, Di; W., Deng, Wang; X., Chen, Xiaorui; S., Fan, Shulei; J., Peng, Junnan; X., Tang, Xumao; D., Wang, Daoxin; Q., Yu, Qian	Qi, Di (56401549900); Deng, Wang (41461001600); Chen, Xiaorui (57421056900); Fan, Shulei (57203664758); Peng, Junnan (57218143735); Tang, Xumao (57196177399); Wang, Daoxin (55753282200); Yu, Qian (57192588780)	56401549900; 41461001600; 57421056900; 57203664758; 57218143735; 57196177399; 55753282200; 57192588780	Adipose-Derived Circulating Exosomes Promote Protection of the Pulmonary Endothelial Barrier by Inhibiting EndMT and Oxidative Stress through Down-Regulation of the TGF- β Pathway: A Potential Explanation for the Obesity Paradox in ARDS	2022	Oxidative Medicine and Cellular Longevity	2022		5475832			0	12	10.1155/2022/5475832	https://www.scopus.com/inward/record.uri?eid=2-s2.0-85130026986&doi=10.1155%2F2022%2F5475832&partnerID=40&md5=355c9ce283cdf67712ab7016f80e9a7d	Article	Final	All Open Access; Green Accepted Open Access; Green Open Access; Hybrid Gold Open Access	Scopus	2-s2.0-85130026986
O., Özatik, Orhan; F.Y., Ozatik, Fikriye Yasemin; Y.A., Tekşen, Yasemin Aktan; I., Daǧ, Ilknur; S.K., Karadeniz-Saygili, Suna Karadeniz; A., Koçak, Ahmet	Özatik, Orhan (55307982400); Ozatik, Fikriye Yasemin (56199789200); Tekşen, Yasemin Aktan (35742131900); Daǧ, Ilknur (26027437800); Karadeniz-Saygili, Suna Karadeniz (57193650563); Koçak, Ahmet (7004164994)	55307982400; 56199789200; 35742131900; 26027437800; 57193650563; 7004164994	Research into the Effect of Proton Pump Inhibitors on Lungs and Leukocytes	2021	Turkish Journal of Gastroenterology	32	12		1003	1011	0	1	10.5152/tjg.2021.20550	https://www.scopus.com/inward/record.uri?eid=2-s2.0-85122525034&doi=10.5152%2Ftjg.2021.20550&partnerID=40&md5=4ec9f8689673415316bf2b8ee46cb176	Article	Final	All Open Access; Green Accepted Open Access; Green Final Open Access; Green Open Access	Scopus	2-s2.0-85122525034
J., Li, Jiucui; K., Lu, Kongmiao; F., Sun, Fenglan; S., Tan, Shanjuan; X., Zhang, Xiao; W., Sheng, Wei; W., Hao, Wanming; M., Liu, Min; W., Lv, Weihong; W., Han, Wei	Li, Jiucui (57222225183); Lu, Kongmiao (57222221915); Sun, Fenglan (57222229276); Tan, Shanjuan (57222224879); Zhang, Xiao (57216883008); Sheng, Wei (57206176688); Hao, Wanming (57195675733); Liu, Min (59845232500); Lv, Weihong (57222228410); Han, Wei (57193133571)	57222225183; 57222221915; 57222229276; 57222224879; 57216883008; 57206176688; 57195675733; 59845232500; 57222228410; 57193133571	Panaxydol attenuates ferroptosis against LPS-induced acute lung injury in mice by Keap1-Nrf2/HO-1 pathway	2021	Journal of Translational Medicine	19	1	96			0	344	10.1186/s12967-021-02745-1	https://www.scopus.com/inward/record.uri?eid=2-s2.0-85101907097&doi=10.1186%2Fs12967-021-02745-1&partnerID=40&md5=7c97a425cc2cbce51319630a5a45272f	Article	Final	All Open Access; Gold Open Access; Green Final Open Access; Green Open Access	Scopus	2-s2.0-85101907097
P., Pan, Pan; J., Chen, Jie; X., Liu, Xudong; J., Fan, Junping; D., Zhang, Dong; W., Zhao, Weiguo; L., Xie, Lixin; L., Su, Longxiang	Pan, Pan (58621607600); Chen, Jie (55642251500); Liu, Xudong (57226579935); Fan, Junping (57220794102); Zhang, Dong (59607245300); Zhao, Weiguo (57063667300); Xie, Lixin (36653380900); Su, Longxiang (55019255100)	58621607600; 55642251500; 57226579935; 57220794102; 59607245300; 57063667300; 36653380900; 55019255100	FUNDC1 Regulates Autophagy by Inhibiting ROS-NLRP3 Signaling to Avoid Apoptosis in the Lung in a Lipopolysaccharide-Induced Mouse Model	2021	Shock	56	5		773	781	0	12	10.1097/SHK.0000000000001835	https://www.scopus.com/inward/record.uri?eid=2-s2.0-85119089655&doi=10.1097%2FSHK.0000000000001835&partnerID=40&md5=0f0325656474f3691826a470ec43427e	Article	Final		Scopus	2-s2.0-85119089655
Z., Zhang, Zhengtao; D., Zhang, Danying; K., Xie, Ke; C., Wang, Chuanjiang; F., Xu, Fang	Zhang, Zhengtao (57225194277); Zhang, Danying (57225195103); Xie, Ke (57209197849); Wang, Chuanjiang (57089290500); Xu, Fang (43161532600)	57225194277; 57225195103; 57209197849; 57089290500; 43161532600	Luteolin activates Tregs to promote IL-10 expression and alleviating caspase-11-dependent pyroptosis in sepsis-induced lung injury	2021	International Immunopharmacology	99		107914			0	79	10.1016/j.intimp.2021.107914	https://www.scopus.com/inward/record.uri?eid=2-s2.0-85109442479&doi=10.1016%2Fj.intimp.2021.107914&partnerID=40&md5=ca88e6e3b52e379391c992f6a7161fa8	Article	Final		Scopus	2-s2.0-85109442479
F., Ul Afshan, Falaque; B., Nissar, Bushra; N.A., Chowdri, Nisar Ahmad; B.A., Ganai, Bashir Ahmad	Ul Afshan, Falaque (57200911785); Nissar, Bushra (57194457915); Chowdri, Nisar Ahmad (6603078823); Ganai, Bashir Ahmad (28767711900)	57200911785; 57194457915; 6603078823; 28767711900	Relevance of vitamin D3 in COVID-19 infection	2021	Gene Reports	24		101270			0	11	10.1016/j.genrep.2021.101270	https://www.scopus.com/inward/record.uri?eid=2-s2.0-85109446304&doi=10.1016%2Fj.genrep.2021.101270&partnerID=40&md5=0e2f40983cbde089915f3d920b20ea6a	Review	Final	All Open Access; Green Final Open Access; Green Open Access	Scopus	2-s2.0-85109446304
Y., Zhan, Yuan; C., Yang, Chunjian; Q., Zhang, Qunhui; L., Yao, Li	Zhan, Yuan (57226242241); Yang, Chunjian (57226247125); Zhang, Qunhui (57226247512); Yao, Li (57226250998)	57226242241; 57226247125; 57226247512; 57226250998	Silent information regulator type-1 mediates amelioration of inflammatory response and oxidative stress in lipopolysaccharide-induced acute respiratory distress syndrome	2021	Journal of Biochemistry	169	5		613	620	0	4	10.1093/jb/mvaa150	https://www.scopus.com/inward/record.uri?eid=2-s2.0-85110953923&doi=10.1093%2Fjb%2Fmvaa150&partnerID=40&md5=54cae56bcfa8e70b9e2837eda34be42a	Article	Final		Scopus	2-s2.0-85110953923
L., Lei, Lihua; Y., Guo, Yiqing; J., Lin, Jun; X., Lin, Xiaohua; S., He, Shiling; Z., Qin, Zaisheng; Q., Lin, Qun	Lei, Lihua (59271929000); Guo, Yiqing (57222396176); Lin, Jun (59799033700); Lin, Xiaohua (57222394748); He, Shiling (57222396499); Qin, Zaisheng (7202822893); Lin, Qun (36864661100)	59271929000; 57222396176; 59799033700; 57222394748; 57222396499; 7202822893; 36864661100	Inhibition of endotoxin-induced acute lung injury in rats by bone marrow–derived mesenchymal stem cells: Role of Nrf2/HO-1 signal axis in inhibition of NLRP3 activation	2021	Biochemical and Biophysical Research Communications	551			7	13	0	16	10.1016/j.bbrc.2021.03.009	https://www.scopus.com/inward/record.uri?eid=2-s2.0-85102608995&doi=10.1016%2Fj.bbrc.2021.03.009&partnerID=40&md5=2eb306dead9e53a7c4d2a84a88712043	Article	Final		Scopus	2-s2.0-85102608995
Q., Yanming, Qin; W., Peng, Wang; X., Xuanxuan, Xu; L., Zheng, Li	Yanming, Qin (57223025343); Peng, Wang (59102473400); Xuanxuan, Xu (57223022151); Zheng, Li (57223030263)	57223025343; 59102473400; 57223022151; 57223030263	Analysis of risk factors of acute respiratory distress syndrome secondary to severe multiple trauma; 严重多发伤继发急性呼吸窘迫综合征的危险因素分析	2021	Chinese Critical Care Medicine	33	3		299	304	0	1	10.3760/cma.j.cn121430-20201023-00685	https://www.scopus.com/inward/record.uri?eid=2-s2.0-85104165770&doi=10.3760%2Fcma.j.cn121430-20201023-00685&partnerID=40&md5=b9e33f91315416a7afb5c78811e04477	Article	Final		Scopus	2-s2.0-85104165770
Z., Hui, Zhao; H., Jie, Huang; G., Fan, Guohua	Hui, Zhao (57222729037); Jie, Huang (57222729245); Fan, Guohua (57204240645)	57222729037; 57222729245; 57204240645	Expression of dusp12 reduces lung vascular endothelial cell damage in a murine model of lipopolysaccharide-induced acute lung injury via the apoptosis signal-regulating kinase 1 (ask1)-jun n-terminal kinase activation (jnk) pathway	2021	Medical Science Monitor	27		e930429			0	10	10.12659/MSM.930429	https://www.scopus.com/inward/record.uri?eid=2-s2.0-85103862699&doi=10.12659%2FMSM.930429&partnerID=40&md5=b6db3d0b100e72b1a5b627e746adfd30	Article	Final	All Open Access; Green Final Open Access; Green Open Access	Scopus	2-s2.0-85103862699
K., Tanimura, Kazuya; T., Nyunoya, Toru	Tanimura, Kazuya (36638586000); Nyunoya, Toru (6505805714)	36638586000; 6505805714	Loss of endothelial WWOX: A risk factor for ARDS in smokers?	2021	American Journal of Respiratory Cell and Molecular Biology	64	1		10	11	0	2	10.1165/rcmb.2020-0444ED	https://www.scopus.com/inward/record.uri?eid=2-s2.0-85098637925&doi=10.1165%2Frcmb.2020-0444ED&partnerID=40&md5=cc5599d2e467ce89dd261994c52b1181	Editorial	Final	All Open Access; Green Final Open Access; Green Open Access; Hybrid Gold Open Access	Scopus	2-s2.0-85098637925
Y., Wu, Yaxian; S., Zeng, Si; B., Wan, Binbin; Y., Wang, Yingying; H., Sun, Hongxu; G., Liu, Gang; Z., Gao, Zhiqi; D., Chen, Dan; Y., Chen, Yongquan; M., Lu, Mudan	Wu, Yaxian (57145576100); Zeng, Si (36910447900); Wan, Binbin (57211372760); Wang, Yingying (57220094733); Sun, Hongxu (57191096881); Liu, Gang (57748498300); Gao, Zhiqi (57217185877); Chen, Dan (59773401100); Chen, Yongquan (7601434133); Lu, Mudan (23389718800)	57145576100; 36910447900; 57211372760; 57220094733; 57191096881; 57748498300; 57217185877; 59773401100; 7601434133; 23389718800	Sophoricoside attenuates lipopolysaccharide-induced acute lung injury by activating the AMPK/Nrf2 signaling axis	2021	International Immunopharmacology	90		107187			0	40	10.1016/j.intimp.2020.107187	https://www.scopus.com/inward/record.uri?eid=2-s2.0-85096854709&doi=10.1016%2Fj.intimp.2020.107187&partnerID=40&md5=5f9f5c67baa7a9a5e2216d64b17d23ae	Article	Final		Scopus	2-s2.0-85096854709
B.B., Muhoberac, Barry B.	Muhoberac, Barry B. (7003815659)	7003815659	What Can Cellular Redox, Iron, and Reactive Oxygen Species Suggest About the Mechanisms and Potential Therapy of COVID-19?	2020	Frontiers in Cellular and Infection Microbiology	10		569709			0	30	10.3389/fcimb.2020.569709	https://www.scopus.com/inward/record.uri?eid=2-s2.0-85098259169&doi=10.3389%2Ffcimb.2020.569709&partnerID=40&md5=41ed46035f4665bc53e96eeb13529959	Article	Final	All Open Access; Gold Open Access; Green Final Open Access; Green Open Access	Scopus	2-s2.0-85098259169
F., Mustafa, Fatima; R., Giles, Rachel; M.S., Pepper, Michael S.	Mustafa, Fatima (57216932070); Giles, Rachel (57217209819); Pepper, Michael S. (24299604000)	57216932070; 57217209819; 24299604000	Rapid evolution of our understanding of the pathogenesis of COVID-19 - implications for therapy	2020	South African Medical Journal	110	12		1180	1185	0	3	10.7196/SAMJ.2020.v110i12.15328	https://www.scopus.com/inward/record.uri?eid=2-s2.0-85097628322&doi=10.7196%2FSAMJ.2020.v110i12.15328&partnerID=40&md5=b4db25f1a3dc134e8b3601ce4ac2d0aa	Review	Final	All Open Access; Gold Open Access; Green Accepted Open Access; Green Open Access	Scopus	2-s2.0-85097628322
H., Ali, Hassan; A.U., Khan, Ashraf Ullah; J., Ali, Jawad; H., Ullah, Hadayat; A., Khan, Adnan; H., Ali, H.; N., Irshad, Nadeem; S., Khan, Salman	Ali, Hassan (57631394300); Khan, Ashraf Ullah (57200756218); Ali, Jawad (59694222100); Ullah, Hadayat (57212806018); Khan, Adnan (57205082415); Ali, H. (56003879200); Irshad, Nadeem (55569097400); Khan, Salman (54393307500)	57631394300; 57200756218; 59694222100; 57212806018; 57205082415; 56003879200; 55569097400; 54393307500	Attenuation of LPS-induced acute lung injury by continentalic acid in rodents through inhibition of inflammatory mediators correlates with increased Nrf2 protein expression	2020	BMC Pharmacology and Toxicology	21	1	81			0	60	10.1186/s40360-020-00458-7	https://www.scopus.com/inward/record.uri?eid=2-s2.0-85096513742&doi=10.1186%2Fs40360-020-00458-7&partnerID=40&md5=efddd5e8d1fd2efbd0b654ab4032cf06	Article	Final	All Open Access; Gold Open Access; Green Final Open Access; Green Open Access	Scopus	2-s2.0-85096513742
E., Yonas, Emir; I., Alwi, Idrus; R., Pranata, Raymond; I., Huang, Ian; M.A., Lim, Michael Anthonius; M., Yamin, Muhammad; S.A., Aman Nasution, Sally Aman; S., Setiati, Siti; S.S., Virani, Salim S.	Yonas, Emir (57201987097); Alwi, Idrus (15055173800); Pranata, Raymond (57201973901); Huang, Ian (57208576645); Lim, Michael Anthonius (57216039756); Yamin, Muhammad (23475706300); Aman Nasution, Sally Aman (57189373134); Setiati, Siti (14325991900); Virani, Salim S. (6701757915)	57201987097; 15055173800; 57201973901; 57208576645; 57216039756; 23475706300; 57189373134; 14325991900; 6701757915	Elevated interleukin levels are associated with higher severity and mortality in COVID 19 – A systematic review, meta-analysis, and meta-regression	2020	Diabetes and Metabolic Syndrome: Clinical Research and Reviews	14	6		2219	2230	0	39	10.1016/j.dsx.2020.11.011	https://www.scopus.com/inward/record.uri?eid=2-s2.0-85096702172&doi=10.1016%2Fj.dsx.2020.11.011&partnerID=40&md5=37f1d3a8ed4e8548333bd6964583a4b2	Article	Final		Scopus	2-s2.0-85096702172
N., Jaiswal, Neha; M., Bhatnagar, Maheep; H., Shah, H.	Jaiswal, Neha (56038383800); Bhatnagar, Maheep (7006428298); Shah, H. (58601946100)	56038383800; 7006428298; 58601946100	N-acetycysteine: A potential therapeutic agent in COVID-19 infection	2020	Medical Hypotheses	144		110133			0	17	10.1016/j.mehy.2020.110133	https://www.scopus.com/inward/record.uri?eid=2-s2.0-85088788797&doi=10.1016%2Fj.mehy.2020.110133&partnerID=40&md5=1bfae5157a6a8aa69ee0198e80adf3ce	Letter	Final	All Open Access; Green Final Open Access; Green Open Access	Scopus	2-s2.0-85088788797
R.I., Horowitz, Richard I.; P.R., Freeman, Phyllis R.	Horowitz, Richard I. (35588255900); Freeman, Phyllis R. (57197705243)	35588255900; 57197705243	Three novel prevention, diagnostic, and treatment options for COVID-19 urgently necessitating controlled randomized trials	2020	Medical Hypotheses	143		109851			0	57	10.1016/j.mehy.2020.109851	https://www.scopus.com/inward/record.uri?eid=2-s2.0-85086122922&doi=10.1016%2Fj.mehy.2020.109851&partnerID=40&md5=0652480869843f139e1bad8f39c73339	Article	Final	All Open Access; Green Final Open Access; Green Open Access; Hybrid Gold Open Access	Scopus	2-s2.0-85086122922
Q., Tang, Qiuyu; J.X., Wei, J. X.; S.F., Xue, S. F.; G., Liu, Guanghua; L., Fu, Lengxi	Tang, Qiuyu (57219862318); Wei, J. X. (57219861915); Xue, S. F. (57219861853); Liu, Guanghua (57209618294); Fu, Lengxi (22979109600)	57219862318; 57219861915; 57219861853; 57209618294; 22979109600	Fibrogrowth factor-2 protects against acute lung injury by activating the PI3K/AKT signaling pathway	2020	Journal of Biological Regulators and Homeostatic Agents	34	5		1679	1688	0	15		https://www.scopus.com/inward/record.uri?eid=2-s2.0-85095801766&partnerID=40&md5=cf24b90ef281baed63efc6f4c6f6c659	Article	Final		Scopus	2-s2.0-85095801766
X., Wu, Xiaoyan; J., Yin, Jingjing; J., Yu, Jiangquan; R., Zheng, Ruiqiang	Wu, Xiaoyan (55715090200); Yin, Jingjing (57204965846); Yu, Jiangquan (24081957200); Zheng, Ruiqiang (8836325400)	55715090200; 57204965846; 24081957200; 8836325400	Effect of different mechanical ventilation modes on patient-ventilator synchrony and diaphragm function in rabbit model of acute respiratory distress syndrome	2020	National Medical Journal of China	100	21		1662	1667	0	0	10.3760/cma.j.cn112137-20191113-02469	https://www.scopus.com/inward/record.uri?eid=2-s2.0-85085909898&doi=10.3760%2Fcma.j.cn112137-20191113-02469&partnerID=40&md5=c885a58e3b38cf695792136ec4c53f3c	Article	Final		Scopus	2-s2.0-85085909898
Z., Zhang, Zhenen; N., Han, Nannan; Y., Shen, Ye	Zhang, Zhenen (57211905731); Han, Nannan (57189854546); Shen, Ye (55554060300)	57211905731; 57189854546; 55554060300	S100A12 promotes inflammation and cell apoptosis in sepsis-induced ARDS via activation of NLRP3 inﬂammasome signaling	2020	Molecular Immunology	122			38	48	0	57	10.1016/j.molimm.2020.03.022	https://www.scopus.com/inward/record.uri?eid=2-s2.0-85082933745&doi=10.1016%2Fj.molimm.2020.03.022&partnerID=40&md5=4f98608739b0f756b9b55eaaba64edf6	Article	Final		Scopus	2-s2.0-85082933745
A., Shaukat, Aftab; C., Yang, Chao; Y., Yang, Yaping; Y., Guo, Yingfang; K., Jiang, Kangfeng; S., Guo, Shuai; J., Liu, Junfeng; T., Zhang, Tao; G., Zhao, Gan; X., Ma, Xiaofei	Shaukat, Aftab (57200540425); Yang, Chao (57202506989); Yang, Yaping (57200075776); Guo, Yingfang (57189588785); Jiang, Kangfeng (57188724855); Guo, Shuai (57198427035); Liu, Junfeng (57206725526); Zhang, Tao (57212649493); Zhao, Gan (57188725112); Ma, Xiaofei (57193687117)	57200540425; 57202506989; 57200075776; 57189588785; 57188724855; 57198427035; 57206725526; 57212649493; 57188725112; 57193687117	Ginsenoside Rb 1: A novel therapeutic agent in Staphylococcus aureus-induced Acute Lung Injury with special reference to Oxidative stress and Apoptosis	2020	Microbial Pathogenesis	143		104109			0	19	10.1016/j.micpath.2020.104109	https://www.scopus.com/inward/record.uri?eid=2-s2.0-85082140966&doi=10.1016%2Fj.micpath.2020.104109&partnerID=40&md5=fc9b0383b02055d274b979791412381e	Article	Final		Scopus	2-s2.0-85082140966
R., Zhou, Renpeng; C., Yong, Chen; X., Wei, Xin; B., Yu, Bin; Z., Xiong, Zhigang; C., Lu, Chao; W., Hu, Wei	Zhou, Renpeng (56675156400); Yong, Chen (57201431358); Wei, Xin (57215919846); Yu, Bin (57219963911); Xiong, Zhigang (7202956056); Lu, Chao (57220939548); Hu, Wei (56479635900)	56675156400; 57201431358; 57215919846; 57219963911; 7202956056; 57220939548; 56479635900	Novel insights into ferroptosis: Implications for age-related diseases	2020	Theranostics	10	26		11976	11997	0	114	10.7150/thno.50663	https://www.scopus.com/inward/record.uri?eid=2-s2.0-85096296222&doi=10.7150%2Fthno.50663&partnerID=40&md5=d2e77f764ae6efe453eb269d0c4286c1	Review	Final	All Open Access; Gold Open Access; Green Final Open Access; Green Open Access	Scopus	2-s2.0-85096296222
D., Feng, Di; H., Zhou, Huanping; X., Jin, Xiaohong; J., Wei, Juan; Q., Zhang, Qingqing; Y., Gu, Yang; P., Zhang, Pengcheng; H., Yang, Hao; J., Song, Jiangang; X., Shi, Xuan	Feng, Di (57190075252); Zhou, Huanping (57201821843); Jin, Xiaohong (57218798893); Wei, Juan (57190073278); Zhang, Qingqing (55631390400); Gu, Yang (57209071802); Zhang, Pengcheng (57201820448); Yang, Hao (57281893500); Song, Jiangang (55500891400); Shi, Xuan (57201292776)	57190075252; 57201821843; 57218798893; 57190073278; 55631390400; 57209071802; 57201820448; 57281893500; 55500891400; 57201292776	Electroacupuncture Pretreatment Alleviates LPS-Induced Acute Respiratory Distress Syndrome via Regulating the PPAR Gamma/NF-Kappa B Signaling Pathway	2020	Evidence-based Complementary and Alternative Medicine	2020		4594631			0	13	10.1155/2020/4594631	https://www.scopus.com/inward/record.uri?eid=2-s2.0-85090285164&doi=10.1155%2F2020%2F4594631&partnerID=40&md5=4761d889ba15b43c2d2dea1b42dc7a51	Article	Final	All Open Access; Green Final Open Access; Green Open Access; Hybrid Gold Open Access	Scopus	2-s2.0-85090285164
R.I., Horowitz, Richard I.; P.R., Freeman, Phyllis R.; J., Bruzzese, James	Horowitz, Richard I. (35588255900); Freeman, Phyllis R. (57197705243); Bruzzese, James (57216432459)	35588255900; 57197705243; 57216432459	Efficacy of glutathione therapy in relieving dyspnea associated with COVID-19 pneumonia: A report of 2 cases	2020	Respiratory Medicine Case Reports	30		101063			0	156	10.1016/j.rmcr.2020.101063	https://www.scopus.com/inward/record.uri?eid=2-s2.0-85083490406&doi=10.1016%2Fj.rmcr.2020.101063&partnerID=40&md5=e06f232e5ea16f5c4ea11e3fc7cb0941	Article	Final	All Open Access; Gold Open Access; Green Final Open Access; Green Open Access	Scopus	2-s2.0-85083490406
N., Erol, Nazlı; L., Saǧlam, Leyla; Y.S., Saǧlam, Yavuz Selim; H.S., Erol, Hüseyin Serkan; S., Altun, Serdar; M.S., Aktaş, Mustafa Sinan; M.B., Halici, Mesut Bünyami	Erol, Nazlı (57208753105); Saǧlam, Leyla (6508188783); Saǧlam, Yavuz Selim (6506654329); Erol, Hüseyin Serkan (56123616900); Altun, Serdar (55768911600); Aktaş, Mustafa Sinan (7004512874); Halici, Mesut Bünyami (6602858328)	57208753105; 6508188783; 6506654329; 56123616900; 55768911600; 7004512874; 6602858328	The Protection Potential of Antioxidant Vitamins Against Acute Respiratory Distress Syndrome: a Rat Trial	2019	Inflammation	42	5		1585	1594	0	53	10.1007/s10753-019-01020-2	https://www.scopus.com/inward/record.uri?eid=2-s2.0-85065739002&doi=10.1007%2Fs10753-019-01020-2&partnerID=40&md5=3a86d52abbe344e6d31a6be01f9d5fd2	Article	Final	All Open Access; Bronze Open Access	Scopus	2-s2.0-85065739002
Q., Gong, Qingmei; Y., Xue, Yan; X., Li, Ximei; L., Song, Lu; L., Zhu, Lili	Gong, Qingmei (57209173842); Xue, Yan (57209179331); Li, Ximei (57209177113); Song, Lu (57217669451); Zhu, Lili (57209174413)	57209173842; 57209179331; 57209177113; 57217669451; 57209174413	DL-3-n-butylphthalide attenuates lipopolysaccharide-induced acute lung injury via SIRT1-dependent and -independent regulation of Nrf2	2019	International Immunopharmacology	74		105658			0	23	10.1016/j.intimp.2019.05.043	https://www.scopus.com/inward/record.uri?eid=2-s2.0-85066760262&doi=10.1016%2Fj.intimp.2019.05.043&partnerID=40&md5=2ad4da6635d6563f12facbfd9bee7473	Article	Final		Scopus	2-s2.0-85066760262
D., Islam, Diana; Y., Huang, Yongbo; V., Fanelli, Vito; L., Delsedime, Luisa; S., Wu, Sulong; J., Khang, Julie; B., Han, Bing; A., Grassi, Alice; M., Li, Manshu; Y., Xu, Yonghao	Islam, Diana (57197607120); Huang, Yongbo (53463605500); Fanelli, Vito (10639884700); Delsedime, Luisa (6602121213); Wu, Sulong (56377257800); Khang, Julie (35798357400); Han, Bing (56768610700); Grassi, Alice (56014307000); Li, Manshu (57190567365); Xu, Yonghao (36465948000)	57197607120; 53463605500; 10639884700; 6602121213; 56377257800; 35798357400; 56768610700; 56014307000; 57190567365; 36465948000	Identification and modulation of microenvironment is crucial for effective mesenchymal stromal cell therapy in acute lung injury	2019	American Journal of Respiratory and Critical Care Medicine	199	10		1214	1224	0	117	10.1164/rccm.201802-0356OC	https://www.scopus.com/inward/record.uri?eid=2-s2.0-85065789775&doi=10.1164%2Frccm.201802-0356OC&partnerID=40&md5=74657ffcabf731e8c5191b18ad3b8fc2	Article	Final		Scopus	2-s2.0-85065789775
Y., Wang, Yun	Wang, Yun (58365907800)	58365907800	Effect of neuromodulatory assisted ventilation on ventilator-associated diaphragmatic dysfunction in patients with acute respiratory distress syndrome; 神经调节辅助通气对急性呼吸窘迫综合征患者呼吸机相关膈肌功能障碍的影响	2019	Journal of Xinxiang Medical University	36	4		392	396	0	0	10.7683/xxyxyxb.2019.04.023	https://www.scopus.com/inward/record.uri?eid=2-s2.0-85163208800&doi=10.7683%2Fxxyxyxb.2019.04.023&partnerID=40&md5=2a2468158cbd6456a8531e64ccc6e920	Article	Final		Scopus	2-s2.0-85163208800
A., Mahmoodpor, Ata; H., Hamishehkar, Hadi; K., Shadvar, Kamran; Z., Ostadi, Zohreh; S., Sanaie, Sarvin; S.H., Saghaleini, Seied Hadi; D.N., Nader, D. Nader	Mahmoodpor, Ata (12753259500); Hamishehkar, Hadi (55179207800); Shadvar, Kamran (36629161400); Ostadi, Zohreh (56165526000); Sanaie, Sarvin (23052644000); Saghaleini, Seied Hadi (57200821334); Nader, D. Nader (6701796043)	12753259500; 55179207800; 36629161400; 56165526000; 23052644000; 57200821334; 6701796043	The Effect of Intravenous Selenium on Oxidative Stress in Critically Ill Patients with Acute Respiratory Distress Syndrome	2019	Immunological Investigations	48	2		147	159	0	77	10.1080/08820139.2018.1496098	https://www.scopus.com/inward/record.uri?eid=2-s2.0-85049791915&doi=10.1080%2F08820139.2018.1496098&partnerID=40&md5=a019b0b0ae472ced24f7cff1a225a07b	Article	Final		Scopus	2-s2.0-85049791915
X., Yan, Xiurui; X., Fu, Xue; Y., Jia, Yuanyuan; X., Ma, Xiaona; J., Tao, Jin; T., Yang, Tingting; H., Ma, Haibin; X., Liang, Xueyun; X., Liu, Xiaoming; J., Yang, Jiali	Yan, Xiurui (55339889500); Fu, Xue (57195149658); Jia, Yuanyuan (57199757820); Ma, Xiaona (55340377100); Tao, Jin (57194759356); Yang, Tingting (58362173100); Ma, Haibin (55624368200); Liang, Xueyun (53264039500); Liu, Xiaoming (35503477600); Yang, Jiali (56512744700)	55339889500; 57195149658; 57199757820; 55340377100; 57194759356; 58362173100; 55624368200; 53264039500; 35503477600; 56512744700	Nrf2/Keap1/ARE signaling mediated an antioxidative protection of human placental mesenchymal stem cells of fetal origin in alveolar epithelial cells	2019	Oxidative Medicine and Cellular Longevity	2019		2654910			0	46	10.1155/2019/2654910	https://www.scopus.com/inward/record.uri?eid=2-s2.0-85068490936&doi=10.1155%2F2019%2F2654910&partnerID=40&md5=09dcb67fd1d5ad265c77430100730eee	Article	Final	All Open Access; Gold Open Access; Green Accepted Open Access; Green Final Open Access; Green Open Access	Scopus	2-s2.0-85068490936
X., Wang, Xida; R., Lai, Rongde; X., Su, Xiangfen; G., Chen, Guibin; Z.J., Liang, Zijing Jiang	Wang, Xida (57196947398); Lai, Rongde (15071957800); Su, Xiangfen (57196946858); Chen, Guibin (57196940180); Liang, Zijing Jiang (15071860900)	57196947398; 15071957800; 57196946858; 57196940180; 15071860900	Edaravone attenuates lipopolysaccharide-induced acute respiratory distress syndrome associated early pulmonary fibrosis via amelioration of oxidative stress and transforming growth factor-β1/Smad3 signaling	2018	Biochemical and Biophysical Research Communications	495	1		706	712	0	14	10.1016/j.bbrc.2017.10.165	https://www.scopus.com/inward/record.uri?eid=2-s2.0-85033792404&doi=10.1016%2Fj.bbrc.2017.10.165&partnerID=40&md5=5de4e60603954e204a7289f984bdbc72	Article	Final		Scopus	2-s2.0-85033792404
L., Pedrazza, Leonardo; A.A., da Cunha, Aline Andrea; C., Luft, Carolina; N.K., Nunes, Nailê Karine; F., Schimitz, Felipe; R.B., Gassen, Rodrigo Benedetti; R.V., Breda, Ricardo Vaz; M.V.F., Donadio, Marcio Vinicius Fagundes; A.T.D.S., Wyse, Angela Terezinha De Souza; P.M.C., Pitrez, Paulo Márcio Condessa	Pedrazza, Leonardo (16200357600); da Cunha, Aline Andrea (15044049200); Luft, Carolina (56183704900); Nunes, Nailê Karine (57193324322); Schimitz, Felipe (57193324977); Gassen, Rodrigo Benedetti (56966752500); Breda, Ricardo Vaz (8563884400); Donadio, Marcio Vinicius Fagundes (9839985800); Wyse, Angela Terezinha De Souza (7006126130); Pitrez, Paulo Márcio Condessa (57201653952)	16200357600; 15044049200; 56183704900; 57193324322; 57193324977; 56966752500; 8563884400; 9839985800; 7006126130; 57201653952	Mesenchymal stem cells improves survival in LPS-induced acute lung injury acting through inhibition of NETs formation	2017	Journal of Cellular Physiology	232	12		3552	3564	0	84	10.1002/jcp.25816	https://www.scopus.com/inward/record.uri?eid=2-s2.0-85012964768&doi=10.1002%2Fjcp.25816&partnerID=40&md5=236b8f43ca013611d03ec7e97a2b473d	Article	Final		Scopus	2-s2.0-85012964768
M., Kellner, Manuela; S.K.R., Noonepalle, Satish Kumar R.; Q., Lu, Qing; A., Srivastava, Anup; E.A., Zemskov, Evgeny A.; S.M., Black, Stephen M.	Kellner, Manuela (57191342823); Noonepalle, Satish Kumar R. (56495315300); Lu, Qing (57213875080); Srivastava, Anup (57194291431); Zemskov, Evgeny A. (8517791400); Black, Stephen M. (7401813904)	57191342823; 56495315300; 57213875080; 57194291431; 8517791400; 7401813904	ROS signaling in the pathogenesis of Acute Lung Injury (ALI) and Acute Respiratory Distress Syndrome (ARDS)	2017	Advances in Experimental Medicine and Biology	967			105	137	0	341	10.1007/978-3-319-63245-2_8	https://www.scopus.com/inward/record.uri?eid=2-s2.0-85032027609&doi=10.1007%2F978-3-319-63245-2_8&partnerID=40&md5=24904fcdab37100cf111d9146952b8a8	Book chapter	Final		Scopus	2-s2.0-85032027609
C., Chen, Chihhung; Y., Chen, Yunglung; P., Sung, Peihsun; C., Sun, Cheukkwan; K., Chen, Kuanhung; Y.L., Chen, Yi Ling; T., Huang, Tienhung; H.I., Lu, Hung I.; F.Y., Lee, Fan Yen; J.J., Sheu, Jiunn Jye	Chen, Chihhung (57216232433); Chen, Yunglung (48061044500); Sung, Peihsun (26650238300); Sun, Cheukkwan (57202568962); Chen, Kuanhung (55643389500); Chen, Yi Ling (57196270889); Huang, Tienhung (56681557600); Lu, Hung I. (57034537800); Lee, Fan Yen (7403111332); Sheu, Jiunn Jye (16231191800)	57216232433; 48061044500; 26650238300; 57202568962; 55643389500; 57196270889; 56681557600; 57034537800; 7403111332; 16231191800	Effective protection against acute respiratory distress syndrome/ sepsis injury by combined adipose-derived mesenchymal stem cells and preactivated disaggregated platelets	2017	Oncotarget	8	47		82415	82429	0	19	10.18632/oncotarget.19312	https://www.scopus.com/inward/record.uri?eid=2-s2.0-85030864621&doi=10.18632%2Foncotarget.19312&partnerID=40&md5=468af7884833dcae785de5ca74c7572f	Article	Final	All Open Access; Gold Open Access; Green Final Open Access; Green Open Access	Scopus	2-s2.0-85030864621
B.A., Panka, Bernardo Amisa; H.J.S., de Grooth, Harm Jan S.; A.M.E., Spoelstra – De Man, Angélique Maria Elisabeth; M.R., Looney, Mark R.; P.R., Tuinman, Pieter R.	Panka, Bernardo Amisa (57191281218); de Grooth, Harm Jan S. (56539910000); Spoelstra – De Man, Angélique Maria Elisabeth (6508076986); Looney, Mark R. (8634457000); Tuinman, Pieter R. (24529223200)	57191281218; 56539910000; 6508076986; 8634457000; 24529223200	Prevention or treatment of ARDS with aspirin: A review of preclinical models and meta-analysis of clinical studies	2017	Shock	47	1		13	21	0	57	10.1097/SHK.0000000000000745	https://www.scopus.com/inward/record.uri?eid=2-s2.0-84988584610&doi=10.1097%2FSHK.0000000000000745&partnerID=40&md5=7a769f55bb4f71e8346bba8d89ccd20b	Review	Final	All Open Access; Green Accepted Open Access; Green Open Access	Scopus	2-s2.0-84988584610
Z., Zhao, Zanmei; D., Xu, Dan; S., Li, Shuqiang; B., He, Bei; Y., Huang, Yixian; M., Xu, Meishu; S., Ren, Songrong; S., Li, Song; H., Wang, Hui; W., Xie, Wen	Zhao, Zanmei (55771046900); Xu, Dan (12780764600); Li, Shuqiang (55771668600); He, Bei (55471323400); Huang, Yixian (55315491500); Xu, Meishu (35957113100); Ren, Songrong (7202285822); Li, Song (55741077100); Wang, Hui (59157647100); Xie, Wen (7401940435)	55771046900; 12780764600; 55771668600; 55471323400; 55315491500; 35957113100; 7202285822; 55741077100; 59157647100; 7401940435	Activation of Liver X Receptor Attenuates Oleic Acid–Induced Acute Respiratory Distress Syndrome	2016	American Journal of Pathology	186	10		2614	2622	0	13	10.1016/j.ajpath.2016.06.018	https://www.scopus.com/inward/record.uri?eid=2-s2.0-84989921393&doi=10.1016%2Fj.ajpath.2016.06.018&partnerID=40&md5=22e4957f13d5f56634c0ccc738ea2cf8	Article	Final	All Open Access; Bronze Open Access; Green Final Open Access; Green Open Access	Scopus	2-s2.0-84989921393
V.S., Dhawale, Vaibhav Shrirang; V.R., Amara, Venkateswara Rao; P.A., Karpe, Pinakin Arun; V., Malek, Vajir; D., Patel, Deep; K.B., Tikoo, Kulbhushan B.	Dhawale, Vaibhav Shrirang (57190165990); Amara, Venkateswara Rao (56112040900); Karpe, Pinakin Arun (48461460500); Malek, Vajir (56454407800); Patel, Deep (57210521316); Tikoo, Kulbhushan B. (6602333465)	57190165990; 56112040900; 48461460500; 56454407800; 57210521316; 6602333465	Activation of angiotensin-converting enzyme 2 (ACE2) attenuates allergic airway inflammation in rat asthma model	2016	Toxicology and Applied Pharmacology	306			17	26	0	57	10.1016/j.taap.2016.06.026	https://www.scopus.com/inward/record.uri?eid=2-s2.0-84978033718&doi=10.1016%2Fj.taap.2016.06.026&partnerID=40&md5=f2371b7ab2c41b7af373e65cefc48f97	Article	Final		Scopus	2-s2.0-84978033718
J., Park, Jeong-ran; H., Lee, Hanbyeol; S., Kim, Seok-in; S., Yang, Seran	Park, Jeong-ran (24824869100); Lee, Hanbyeol (59447620000); Kim, Seok-in (57191262420); Yang, Seran (13604831500)	24824869100; 59447620000; 57191262420; 13604831500	The tri-peptide GHK-Cu complex ameliorates lipopolysaccharideinduced acute lung injury in mice	2016	Oncotarget	7	36		58405	58417	0	53	10.18632/oncotarget.11168	https://www.scopus.com/inward/record.uri?eid=2-s2.0-84988416349&doi=10.18632%2Foncotarget.11168&partnerID=40&md5=4020b378d799b22ff11df80f54a272b8	Article	Final	All Open Access; Gold Open Access; Green Open Access	Scopus	2-s2.0-84988416349
R.L., Castillo, Rodrigo L.; R.A., Carrasco, Rodrigo A.; C., Romero-Dapueto, Carolina	Castillo, Rodrigo L. (55540042800); Carrasco, Rodrigo A. (56734487400); Romero-Dapueto, Carolina (56734507800)	55540042800; 56734487400; 56734507800	Pathophysiological Approaches of Acute Respiratory Distress Syndrome: Novel Bases for Study of Lung Injury	2015	Open Respiratory Medicine Journal	9			83	91	0	29	10.2174/1874306401509010083	https://www.scopus.com/inward/record.uri?eid=2-s2.0-84937807420&doi=10.2174%2F1874306401509010083&partnerID=40&md5=66254fcabe83d9477483834ae82d3a52	Article	Final	All Open Access; Green Accepted Open Access; Green Final Open Access; Green Open Access; Hybrid Gold Open Access	Scopus	2-s2.0-84937807420
C.E., Overgaard, Christian E.; B.L., Schlingmann, Barbara Lisa; S.D., White, Stevenclaude Dorsainvil; C.J., Ward, Christina J.; X., Fan, Xian; S., Swarnakar, Snehasikta; L.A.S., Brown, Lou Ann Scism; D.M., Guidot, David M.; M., Koval, Michael	Overgaard, Christian E. (26423105300); Schlingmann, Barbara Lisa (43561744200); White, Stevenclaude Dorsainvil (56693546400); Ward, Christina J. (36978438100); Fan, Xian (7403393636); Swarnakar, Snehasikta (6603614861); Brown, Lou Ann Scism (7404221154); Guidot, David M. (7004229558); Koval, Michael (7007019356)	26423105300; 43561744200; 56693546400; 36978438100; 7403393636; 6603614861; 7404221154; 7004229558; 7007019356	The relative balance of GM-CSF and TGF-β1 regulates lung epithelial barrier function	2015	American Journal of Physiology - Lung Cellular and Molecular Physiology	308	12		1212	1223	0	52	10.1152/ajplung.00042.2014	https://www.scopus.com/inward/record.uri?eid=2-s2.0-84932155449&doi=10.1152%2Fajplung.00042.2014&partnerID=40&md5=18aee08dbc5263b6378a88a37e313865	Article	Final	All Open Access; Green Final Open Access; Green Open Access	Scopus	2-s2.0-84932155449
N.R., Aggarwal, Neil Raj; R.G., Brower, Roy G.	Aggarwal, Neil Raj (11639519300); Brower, Roy G. (7102087406)	11639519300; 7102087406	Targeting normoxemia in acute respiratory distress syndrome may cause worse short-term outcomes because of oxygen toxicity	2014	Annals of the American Thoracic Society	11	9		1449	1453	0	41	10.1513/AnnalsATS.201407-297PS	https://www.scopus.com/inward/record.uri?eid=2-s2.0-84914669723&doi=10.1513%2FAnnalsATS.201407-297PS&partnerID=40&md5=704cc5c83ad44cf9703e822c4cdc099b	Review	Final		Scopus	2-s2.0-84914669723
N., Fard, Nassim; A., Saffari, Arash; G., Emami, Golnaz; S., Hofer, Stefan; H.U., Kauczor, Hans Ulrich; A., Mehrabi, Arianeb	Fard, Nassim (55815656200); Saffari, Arash (56242135500); Emami, Golnaz (56115598600); Hofer, Stefan (35310713000); Kauczor, Hans Ulrich (7102275418); Mehrabi, Arianeb (7005771648)	55815656200; 56242135500; 56115598600; 35310713000; 7102275418; 7005771648	Acute respiratory distress syndrome induction by pulmonary ischemia-reperfusion injury in large animal models	2014	Journal of Surgical Research	189	2		274	284	0	29	10.1016/j.jss.2014.02.034	https://www.scopus.com/inward/record.uri?eid=2-s2.0-84901198762&doi=10.1016%2Fj.jss.2014.02.034&partnerID=40&md5=546c0f7d06bdc7c3c0caf5ab779166f7	Review	Final		Scopus	2-s2.0-84901198762
R.D., Britt, Rodney D.; M., Velten, Markus; M.L., Locy, Morgan L.; L.K., Rogers, Lynette K.; T., Tipple, Trent	Britt, Rodney D. (35602771200); Velten, Markus (23399272600); Locy, Morgan L. (55189357300); Rogers, Lynette K. (7402425411); Tipple, Trent (22136614000)	35602771200; 23399272600; 55189357300; 7402425411; 22136614000	The thioredoxin reductase-1 inhibitor aurothioglucose attenuates lung injury and improves survival in a murine model of acute respiratory distress syndrome	2014	Antioxidants and Redox Signaling	20	17		2681	2691	0	35	10.1089/ars.2013.5332	https://www.scopus.com/inward/record.uri?eid=2-s2.0-84901033249&doi=10.1089%2Fars.2013.5332&partnerID=40&md5=25df0b26f786782c39b550d5e22df5b9	Article	Final	All Open Access; Green Final Open Access; Green Open Access	Scopus	2-s2.0-84901033249
J., Hirsch, Jan; R.J., Chalkley, Robert J.; T., Bentley, Trevor; A.L., Burlingame., Alma L.Burlingame; J.A., Frank, James A.	Hirsch, Jan (57196745808); Chalkley, Robert J. (57210684716); Bentley, Trevor (56125522600); Burlingame., Alma L.Burlingame (35475505400); Frank, James A. (7401731488)	57196745808; 57210684716; 56125522600; 35475505400; 7401731488	Double impact of cigarette smoke and mechanical ventilation on the alveolar epithelial type II cell	2014	Critical Care	18	2	R50			0	16	10.1186/cc13795	https://www.scopus.com/inward/record.uri?eid=2-s2.0-84899104567&doi=10.1186%2Fcc13795&partnerID=40&md5=f15b9bc3b5694682e9b64e589f31cef7	Article	Final	All Open Access; Gold Open Access; Green Final Open Access; Green Open Access	Scopus	2-s2.0-84899104567
D., Liu, Dongdong; P., Mao, Pu; Y., Huang, Yongbo; Y., Liu, Yiting; X., Liu, Xiaoqing; X., Pang, Xiaoqing; Y., Li, Yimin	Liu, Dongdong (56130862700); Mao, Pu (47361201300); Huang, Yongbo (53463605500); Liu, Yiting (55926607800); Liu, Xiaoqing (56369743100); Pang, Xiaoqing (56263243700); Li, Yimin (55925657400)	56130862700; 47361201300; 53463605500; 55926607800; 56369743100; 56263243700; 55925657400	Proteomic analysis of lung tissue in a rat acute lung injury model: Identification of PRDX1 as a promoter of inflammation	2014	Mediators of Inflammation	2014		469358			0	31	10.1155/2014/469358	https://www.scopus.com/inward/record.uri?eid=2-s2.0-84904135583&doi=10.1155%2F2014%2F469358&partnerID=40&md5=59e22578780cd19e235201638808284e	Article	Final	All Open Access; Gold Open Access; Green Accepted Open Access; Green Final Open Access; Green Open Access	Scopus	2-s2.0-84904135583
A., Fernandez-Bustamante, Ana; J.E., Repine, John E.	Fernandez-Bustamante, Ana (8503884800); Repine, John E. (7102794265)	8503884800; 7102794265	Chronic inflammatory diseases and the Acute Respiratory Distress Syndrome (ARDS)	2014	Current Pharmaceutical Design	20	9		1400	1408	0	11	10.2174/13816128113199990561	https://www.scopus.com/inward/record.uri?eid=2-s2.0-84896320286&doi=10.2174%2F13816128113199990561&partnerID=40&md5=8212971e189b5480454b665fcf7b8aa9	Review	Final		Scopus	2-s2.0-84896320286
L., Kaphalia, Lata; W.J., Calhoun, William J.	Kaphalia, Lata (6505765491); Calhoun, William J. (7007078401)	6505765491; 7007078401	Alcoholic lung injury: Metabolic, biochemical and immunological aspects	2013	Toxicology Letters	222	2		171	179	0	84	10.1016/j.toxlet.2013.07.016	https://www.scopus.com/inward/record.uri?eid=2-s2.0-84882757640&doi=10.1016%2Fj.toxlet.2013.07.016&partnerID=40&md5=21087344c333fff3de80b28b65c881b3	Review	Final	All Open Access; Green Accepted Open Access; Green Open Access; Hybrid Gold Open Access	Scopus	2-s2.0-84882757640
D.R., Janz, David R.; L.B., Ware, Lorraine B.	Janz, David R. (24466478200); Ware, Lorraine B. (7005881261)	24466478200; 7005881261	Biomarkers of ALI/ARDS: Pathogenesis, discovery, and relevance to clinical trials	2013	Seminars in Respiratory and Critical Care Medicine	34	4		537	548	0	68	10.1055/s-0033-1351124	https://www.scopus.com/inward/record.uri?eid=2-s2.0-84881581885&doi=10.1055%2Fs-0033-1351124&partnerID=40&md5=505882c71d3df18b0054858a5a3be21c	Article	Final		Scopus	2-s2.0-84881581885
H., Dong, Haiyun; J., Li, Jinxiu; Y., Lv, Youdi; Y., Zhou, Yanyan; G., Wang, Guyi; S., Hu, Shuang; X., He, Xiaoyu; P., Yang, Ping; Z., Zhou, Zhiguang; X., Xiang, Xudong	Dong, Haiyun (55765886500); Li, Jinxiu (55571694600); Lv, Youdi (55746329400); Zhou, Yanyan (57199493364); Wang, Guyi (52664664200); Hu, Shuang (7404287192); He, Xiaoyu (55766304000); Yang, Ping (57709673400); Zhou, Zhiguang (8417885800); Xiang, Xudong (19740194400)	55765886500; 55571694600; 55746329400; 57199493364; 52664664200; 7404287192; 55766304000; 57709673400; 8417885800; 19740194400	Comparative analysis of the alveolar macrophage proteome in ALI/ARDS patients between the exudative phase and recovery phase	2013	BMC Immunology	14	1	25			0	30	10.1186/1471-2172-14-25	https://www.scopus.com/inward/record.uri?eid=2-s2.0-84879053288&doi=10.1186%2F1471-2172-14-25&partnerID=40&md5=f97e2ce44f97fa925f7c317df7e4f94d	Article	Final	All Open Access; Gold Open Access; Green Final Open Access; Green Open Access	Scopus	2-s2.0-84879053288
Z., Vahdat Shariatpanahi, Zahra; M.M., Mokhtari, Majid M.; F.A., Taleban, Forough Azam; F., Alavi, Farhad; M.H., Salehi Surmaghi, Mohammad Hossein; Y., Mehrabi, Yadollah; S.H., Shahbazi, Shaahin H.	Vahdat Shariatpanahi, Zahra (55330329400); Mokhtari, Majid M. (26326376800); Taleban, Forough Azam (8410645500); Alavi, Farhad (57221911176); Salehi Surmaghi, Mohammad Hossein (6506627312); Mehrabi, Yadollah (15520002000); Shahbazi, Shaahin H. (37032028700)	55330329400; 26326376800; 8410645500; 57221911176; 6506627312; 15520002000; 37032028700	Effect of enteral feeding with ginger extract in acute respiratory distress syndrome	2013	Journal of Critical Care	28	2		217	217000000	0	40	10.1016/j.jcrc.2012.04.017	https://www.scopus.com/inward/record.uri?eid=2-s2.0-84875398806&doi=10.1016%2Fj.jcrc.2012.04.017&partnerID=40&md5=6a2ce022119175f69699fc821ce976e8	Article	Final		Scopus	2-s2.0-84875398806
C., Chian, Chihfeng; C.H., Chiang, Chi Hueri; C., Yuan-Jung, Chu; C., Chuang, Chiaohui; S., Liu, Shiouling; J., Yi-Han, Jheng; H.S., Zhang, Haibo S.; J.H., Ryu, Jay H.	Chian, Chihfeng (6701861191); Chiang, Chi Hueri (7402434394); Yuan-Jung, Chu (55216571700); Chuang, Chiaohui (49963253700); Liu, Shiouling (57060973400); Yi-Han, Jheng (55216571000); Zhang, Haibo S. (55959641000); Ryu, Jay H. (7004905163)	6701861191; 7402434394; 55216571700; 49963253700; 57060973400; 55216571000; 55959641000; 7004905163	Apocynin attenuates lipopolysaccharide-induced lung injury in an isolated and perfused rat lung model	2012	Shock	38	2		196	202	0	17	10.1097/SHK.0b013e31825a1982	https://www.scopus.com/inward/record.uri?eid=2-s2.0-84863980304&doi=10.1097%2FSHK.0b013e31825a1982&partnerID=40&md5=84e55ce0a823738282dc66e16d8761d4	Article	Final	All Open Access; Bronze Open Access	Scopus	2-s2.0-84863980304
C.H., Chiang, Chi Hueri; C., Chuang, Chiaohui; S., Liu, Shiouling; C., Chian, Chihfeng; H.S., Zhang, Haibo S.; J.H., Ryu, Jay H.	Chiang, Chi Hueri (7402434394); Chuang, Chiaohui (49963253700); Liu, Shiouling (57060973400); Chian, Chihfeng (6701861191); Zhang, Haibo S. (55959641000); Ryu, Jay H. (7004905163)	7402434394; 49963253700; 57060973400; 6701861191; 55959641000; 7004905163	N-acetylcysteine attenuates ventilator-induced lung injury in an isolated and perfused rat lung model	2012	Injury	43	8		1257	1263	0	19	10.1016/j.injury.2011.12.026	https://www.scopus.com/inward/record.uri?eid=2-s2.0-84863536437&doi=10.1016%2Fj.injury.2011.12.026&partnerID=40&md5=828087a8b9307822c563be88d661786f	Article	Final		Scopus	2-s2.0-84863536437
J.J.D., Repine, Jonathan J.D.; K.M., Crader, Katrina M.; N.D., Elkins, Nancy D.; P., Wilson, Paul; J.E., Repine, John E.	Repine, Jonathan J.D. (54880282100); Crader, Katrina M. (54879667700); Elkins, Nancy D. (6701483634); Wilson, Paul (57184772700); Repine, John E. (7102794265)	54880282100; 54879667700; 6701483634; 57184772700; 7102794265	Preventing the Acute Respiratory Distress Syndrome	2012	Preventive Medicine	54	SUPPL.		S17	S19	0	2	10.1016/j.ypmed.2011.12.007	https://www.scopus.com/inward/record.uri?eid=2-s2.0-84860880105&doi=10.1016%2Fj.ypmed.2011.12.007&partnerID=40&md5=c31f6d39fda1b14dfe05e2f037462433	Note	Final		Scopus	2-s2.0-84860880105
E., Lee, Eunjoo; J., Lim, Ji-youn; S., Lee, Sang-yeub; S.H., Lee, Seung Hyeun; K., In, Kwangho; S., Yoo, Sehwa; D., Sul, Donggeun; S., Park, Sanghoon	Lee, Eunjoo (55650947900); Lim, Ji-youn (55632953200); Lee, Sang-yeub (57192521498); Lee, Seung Hyeun (57208400366); In, Kwangho (7006019587); Yoo, Sehwa (55664508400); Sul, Donggeun (6701809145); Park, Sanghoon (57221239387)	55650947900; 55632953200; 57192521498; 57208400366; 7006019587; 55664508400; 6701809145; 57221239387	The expression of HSPs, anti-oxidants, and cytokines in plasma and bronchoalveolar lavage fluid of patients with acute respiratory distress syndrome	2012	Clinical Biochemistry	45	6		493	498	0	7	10.1016/j.clinbiochem.2012.01.020	https://www.scopus.com/inward/record.uri?eid=2-s2.0-84862776794&doi=10.1016%2Fj.clinbiochem.2012.01.020&partnerID=40&md5=20dbf9189e922627aba2bd93f47b2f92	Article	Final	All Open Access; Green Final Open Access; Green Open Access	Scopus	2-s2.0-84862776794
A., Chrispal, Anugrah	Chrispal, Anugrah (25642691000)	25642691000	Cleistanthus collinus poisoning	2012	Journal of Emergencies, Trauma and Shock	5	2		160	166	0	24	10.4103/0974-2700.96486	https://www.scopus.com/inward/record.uri?eid=2-s2.0-84862536591&doi=10.4103%2F0974-2700.96486&partnerID=40&md5=2875ee054ca33692a4e521a976ba2c4d	Conference paper	Final	All Open Access; Gold Open Access	Scopus	2-s2.0-84862536591

## Sheet: Excluson after full text n=11
Title	Authors	DOI	Publication Year	Inclusion/Exclusion	Reason	Reason for Exclusion
Response to Intravenous NAC in Critically Ill COVID-19 Patients	Gamarra-Morales Y et al.	10.3390/nu15092235	2023	EXCLUDE	Human study, COVID-19 ARDS-risk	Outpatient or mild COVID-19; not critical care / ICU population; did not evaluate ARDS onset, severity, progression, or relevant ICU outcomes.
Dendrimer nanotherapy for severe COVID-19	Gusdon AM et al.	10.1126/scitranslmed.abo2652	2022	EXCLUDE	Human study, severe COVID-19 ARDS-risk	Intervention not standard NAC or glutathione; focused on dendrimer-based nanotherapy, preventing isolation of NAC effect.
Combined nebulization (heparin + NAC + steroids) in COVID-19	Gong J et al.	10.1186/s12890-025-03824-5	2025	EXCLUDE	Human study, COVID-19 ARDS-risk	Multi-component nebulization regimen (heparin + NAC + steroids + ipratropium); could not isolate NAC effect; population not strictly ARDS.
Pentoxifylline in hospitalized COVID-19 patients	Azizi H et al.	10.1016/j.intimp.2021.108227	2021	EXCLUDE	Human study, severe COVID-19 ARDS-risk	Wrong outcomes; did not report ARDS-related ICU endpoints or oxidative stress markers.
Antioxidants as adjuvant therapy in septic shock	Pérez-Torres I et al.	10.3390/ijms242316610	2023	EXCLUDE	Human study, septic shock (ARDS-risk)	Wrong outcomes; evaluated antioxidants as adjuvant therapy in septic shock without specific ARDS endpoints.
Sodium selenite infusion in septic shock (secondary analysis)	Forceville X et al.	10.1016/j.jtemb.2022.127031	2022	EXCLUDE	Human study, septic shock (ARDS-risk)	Wrong outcomes; secondary analysis in septic shock, no ARDS-specific outcomes or ICU endpoints.
Enteral glutamine in SIRS due to pulmonary infection	Cavalcante AA et al.	10.1016/j.nut.2011.07.011	2012	EXCLUDE	Human study, ARDS-risk	Intervention: glutamine (not NAC/glutathione); population: SIRS due to pulmonary infection; outcomes not specific to ARDS progression.
Use of N-Acetylcysteine at high doses as an oral treatment for patients hospitalized with COVID-19	Izquierdo JL et al.	10.1177/00368504221074574	2022	EXCLUDE	NAC intervention in respiratory distress (ARDS risk)	Wrong study design; high-dose oral NAC in hospitalized patients without clear ARDS stratification; ICU outcomes not reported.
Ferroptosis, pyroptosis and necroptosis in acute respiratory distress syndrome	Zheng, YX; Huang, YB; Xu, YH; Sang, L; Liu, XQ; Li, YM	10.1038/s41420-023-01369-2	2023	EXCLUDE	NAC/glutathione relevant intervention and ARDS population	Review / mechanistic study; assessed cell death pathways in ARDS, not a clinical NAC/glutathione intervention study.
N-acetylcysteine for adults with acute respiratory distress syndrome: A meta-analysis …	Lu, X; Ma, Y; …	10.1177/1024907918794559	2019	EXCLUDE		Meta-analysis only; did not provide new primary patient-level data for inclusion.
A metabolomic analysis of thiol response for standard and modified N-acetyl cysteine treatment regimens …	Dear JW, Ng ML, …	10.1111/cts.13009	2021	EXCLUDE		Mechanistic / metabolomics study; did not include clinical outcomes related to ARDS progression or ICU endpoints.

## Sheet: Characterstics of included stud
Study Identifiers					Setting & Design					Interventions / Exposures			Outcomes (Main Clinical)				Exposure Associations		Risk of Bias									Miscellaneous		Investigator Details
Study Identifiers	Author(s) & Year	Title	DOI / PMID	Journal	Country / Region	Study Design	Setting	Population Characteristics	Sample Size	Intervention Type	Dose & Duration	Comparator / Control	Numbers in Each Arm	Primary Outcome	Outcome Definition	Outcome Measure Type	Numbers With Outcomes	Effect Estimate (RR/OR/MD)	Statistical Significance	Association (Exposure = NAC/Glutathione vs Control)	Association (Exposure = Other Antioxidant vs Control)	Sequence Generation	Allocation Concealment	Blinding	Incomplete Outcome Data	Selective Reporting	Overall RoB Judgment
s1	de Alencar et al., 2021	Double-blind, Randomized, Placebo-controlled Trial with N-acetylcysteine for Treatment of Severe Acute Respiratory Syndrome Caused by COVID-19	10.1093/cid/ciaa1443	Clinical Infectious Diseases	Brazil	Randomized, double-blind, placebo-controlled trial	Emergency Dept, Hospital das Clínicas, São Paulo	Adults ≥ 18 years with severe COVID-19 (SaO₂ < 94% or RR > 24 bpm); excluded if intubation imminent	135 (68 NAC, 67 placebo)	Intravenous N-acetylcysteine (NAC)	21 g (≈ 300 mg/kg) over 20 hours (14 g + 7 g)	Dextrose 5% IV placebo (equal volume 1000 mL)	68 vs 67	Need for mechanical ventilation	Invasive ventilation requirement post-randomization	Binary (yes/no) – primary endpoint	NAC: 14 (20.6%) vs Placebo: 16 (23.9%)	OR = 1.21 (0.53–2.72)	P = 0.641 (not significant)	No difference in need for mechanical ventilation or mortality	NA	Adequate (random numbers via QuickCalcs)	Concealed by pharmacist with numbered packs	Double-blind (patient, investigator, pharmacist)	Low (dropout < 5%)	Low (pre-registered trial REBEC)	Low
s2	Panahi et al., 2022	Evaluation the efficacy and safety of N-acetylcysteine inhalation spray in controlling the symptoms of patients with COVID-19	10.1002/jmv.28393	J Med Virol (journal article)	Iran (Tehran)	Prospective randomized, open-label, controlled clinical trial	Single-center, hospital (inpatient)	Adults hospitalized with COVID-19; excluded if imminent need for intubation/ICU at baseline; symptom onset <7 days	250	NAC inhalation spray (mucolytic / antioxidant) + standard care	1 puff (200 µg/puff) every 12 h → 400 µg/day for 7 days (inhaler spray)	Standard care alone	Intervention n=125 / Control n=125	Clinical outcomes (mortality reported); CT and NEWS scores; lab markers	Mortality at 28 days / development of severe respiratory failure; CT score; NEWS; CRP, WBC, etc.	Dichotomous (mortality), continuous (CT score, biomarkers)	Mortality: Intervention: 4/125 (3.2%); Control: 49/125 (39.2%). CT score medians reported (6 vs 7 post-treatment)	Risk Ratio (RR) for mortality = (4/125) / (49/125) = 4/49 = 0.08163 ≈ RR 0.082 (Panahi reported p < 0.001)	p < 0.001 (mortality difference)	Strongly protective (NAC inhaler associated with lower mortality in this trial)	Not applicable	Block randomization (permuted blocks of 6) — computer-generated	Sealed envelope technique reported (so allocation concealment described)	Open-label (no blinding)	0 lost to follow-up (all 250 completed analysis)	No evidence selective reporting in text (primary outcomes reported)	Overall RoB: Some concerns / High (open-label + baseline age imbalance; but randomization & complete follow-up reduce biases)	Single-center; registered IRCT20080901001165N55; CONSORT; inhaler product @sinadarou.co
S3	Aisa-Álvarez A et al., 2020	Antioxidant Therapy in Septic Shock: Randomized Triple-Masked Clinical Trial of Vitamin C, Vitamin E, N-Acetylcysteine, and Melatonin	10.3390/medicina56120619 / PMID 33317221	Medicina	Mexico (two ICUs in Mexico City)	Controlled, randomized, triple-masked, parallel-group clinical trial	Intensive Care Unit (ICU) – septic shock patients	Adults ≥ 18 y with septic shock (Sepsis-3 criteria: SOFA + 2, lactate > 2 mmol/L, vasopressor ≥ 2 h). Excluded pregnant/lactating, chronic steroid/statin/antioxidant users, or contraindication to agents.	Total = 97 (18 Vit C + 18 Vit E + 20 NAC + 20 Melatonin + 21 Control)	Oral / NG antioxidant therapy for 5 days + standard sepsis care	NAC 600 mg q12h × 5 days; Vit C 1 g q6h; Vit E 400 IU q8h; Melatonin 50 mg daily × 5 days	Standard sepsis therapy without antioxidants	NAC n = 20 ; Control n = 21 ; others = 18–20 per antioxidant group	Change in SOFA score over 5 days	Sequential Organ Failure Assessment (SOFA) score reduction from baseline	Continuous (Δ SOFA); Mixed linear model with repeated measures	All 97 analyzed (100 % follow-up)	NAC Δ SOFA −0.62 (95 % CI −1.55 to 0.30); p = 0.18 (not sig.)	Not significant for NAC (p = 0.18); significant only for Vit C and Melatonin (p < 0.01 and p = 0.007 respectively)	PCT significantly (p = 0.001); no change in SOFA or mortality; mild TAC (p = 0.05) → modest antioxidant effect without clinical improvement	Vit C SOFA and CRP significantly; Melatonin ↓ SOFA; Vit E ↓ PCT (p < 0.05) → some benefit on OS markers	Computer-generated randomization (central allocation sequence)	Maintained by investigational pharmacy at each site	Triple-masked (patients, clinicians, analysts)	None missing (100 % analyzed)	Low risk — registered trial (NCT03557229), all outcomes reported	Low risk of bias	Ethical approval obtained (INcar PT-18-076; ABC-18-19). Trial registered (ClinicalTrials.gov NCT03557229). Adverse events minimal — none with NAC.		Aisa-Álvarez A, Martínez-Cruz A, Valdés-Fernández B, et al., Instituto Nacional de Cardiología Ignacio Chávez & ABC Medical Center, Mexico City (Mexico).
S4	Taher A, Lashgari M, et al., 2021	A Pilot Study on Intravenous N-Acetylcysteine Treatment in Patients with Mild-to-Moderate COVID-19–Associated ARDS	10.1007/s43440-021-00296-2 / PMID 34386488	Clinical and Translational Discovery (2021)	Iran (Hamadan University of Medical Sciences, tertiary hospital ICU)	Prospective, randomized, double-blind, placebo-controlled, phase 2 pilot clinical trial	ICU, tertiary referral hospital (30-bed unit)	Adults ≥18 years with mild-to-moderate COVID-19 ARDS (PaO₂/FiO₂ 100–300 mm Hg, <48 h of hospital admission). Excluded: severe ARDS (PaO₂/FiO₂ < 100), mechanical ventilation at baseline, chronic renal/hepatic failure, chronic oxygen therapy, pregnancy/lactation, antioxidant supplement use outside protocol.	92 randomized (47 NAC, 45 placebo); all completed 28-day follow-up	IV antioxidant (N-acetylcysteine) plus standard care	NAC 40 mg/kg/day continuous IV infusion in 5% dextrose for 3 days	Placebo (5% dextrose) identical volume and schedule + standard care	NAC n = 47; Placebo n = 45	28-day mortality; clinical status on day 28 (WHO 8-point ordinal scale); recovery rate (WHO 1–3)	WHO Clinical Progression Scale: 0 = uninfected, 1–3 = recovery, 4–7 = hospitalized with escalating oxygen/ventilation support, 8 = death	Categorical (ordinal WHO scale); binary (mortality/recovery); continuous (PaO₂/FiO₂ ratio, SOFA, length of stay)	Mortality: NAC = 12/47 (25.5%); Placebo = 14/45 (31.1%) (p = 0.64); Recovery: NAC = 22/47 (46.8%) vs Placebo = 17/45 (37.8%) (p = 0.41); Mechanical ventilation: 38.3% vs 44.4% (p = 0.83)	No significant differences: 28-day mortality RR ≈ 0.82 (ns); PaO₂/FiO₂ + ~74 mm Hg in both groups; SOFA difference p > 0.1	None of the between-group comparisons were statistically significant (all p > 0.05)	NAC group had non-significant trends toward lower mortality and shorter ICU stay (8 vs 10 days; p = 0.48) but no significant improvement in oxygenation, SOFA, or recovery.	N/A – only NAC tested	Computer-generated block randomization (1:1) by independent statistician	Maintained via hospital pharmacy (identical hooded infusions)	Double-blind (patients, clinicians, and investigators)	None lost to follow-up (100% analyzed)	Low risk — registered (IRCT20120215009014N355), all prespecified outcomes reported	Low risk of bias	All patients also received Vitamin C, D, Zinc per institutional protocol. No severe adverse events or treatment discontinuations. Ethics approval IR.UMSHA.REC.1399.153.		Department of Pulmonology and Intensive Care, Hamadan University of Medical Sciences, Iran. Principal Investigator: Dr. Ali Taher.
S5	Peivandi Yazdi A., Nematollahi MH., Ghazvini K., et al., 2021	Comparison of Continuous Versus Intermittent Infusion of N-Acetylcysteine on Oxidative Stress in Critically Ill Septic Patients: A Pilot Randomized Clinical Trial	10.1177/21565872211013324 / PMID 33975183	Clinical and Experimental Pharmacology and Physiology (2021)	Iran — Imam Reza Hospital, Mashhad University of Medical Sciences	Prospective, randomized, placebo-controlled pilot trial (3-arm parallel design)	Intensive Care Unit (ICU), single tertiary-care hospital	Adult ICU patients (mean age ≈ 58 years; 25 females, 35 males) with sepsis fulfilling ≥2 SIRS criteria. Excluded: prior antioxidant/vitamin supplementation, NAC contraindication.	N = 60 (20 placebo, 20 intermittent infusion NAC, 20 continuous infusion NAC)	IV N-Acetylcysteine (antioxidant therapy)	Total 100 mg/kg over 24 h: (1) Intermittent infusion – 25 mg/kg bolus + 25 mg/kg q8h × 3; (2) Continuous infusion – 25 mg/kg bolus + 75 mg/kg continuous infusion over 24 h	Placebo – 100 mL/kg isotonic saline over 24 h	Placebo n = 20; Intermittent n = 20; Continuous n = 20	Change in Total Antioxidant Capacity (TAC) and Malondialdehyde (MDA) levels before and after intervention	TAC = ability to inhibit ABTS⁺ oxidation (measured at 750 nm); MDA = lipid peroxidation product (measured at 530–540 nm)	Continuous biochemical markers (mmol/L)	TAC before: 0.60 (placebo), 0.60 (intermittent), 0.63 (continuous); after: 0.61, 0.68, 0.69 → p = 0.007 (significant) / MDA before: 27.9, 27.2, 26.1; after: 31.8, 19.5, 22.5 → p < 0.001 (significant)	Post-hoc Scheffé: TAC ↑ by +0.07 mmol/L (intermittent vs placebo p = 0.036; continuous vs placebo p = 0.015). MDA ↓ by ~10–12 mmol/L (p = 0.001–0.002 vs placebo). No difference between NAC arms (p > 0.4).	Significant improvement in oxidative stress markers (TAC↑, MDA↓) for both NAC groups vs placebo (p < 0.05); no difference between intermittent and continuous infusions.	NAC infusion significantly increased TAC and reduced MDA vs placebo, indicating improved redox status. No clinical outcomes (survival, ICU stay) were analyzed.	N/A – only NAC tested	Random number table	Not explicitly stated, but placebo identical infusion volume; risk low-moderate	Not explicitly described as double-blind; likely single-blind (patients) since intervention prepared by staff	None reported – all 60 analyzed	Low risk – protocol adhered; biochemical outcomes pre-specified and reported	Low to Moderate risk of bias (due to possible blinding limitations)	Ethics approval: Mashhad University of Medical Sciences Research & Ethics Committee. Funding not specified. No serious AEs reported.		Department of Anesthesiology and Critical Care, Imam Reza Hospital, Mashhad University of Medical Sciences, Iran. Principal Investigator: Dr. A. Peivandi Yazdi.
S6	Najafi A., Malekmohammad M., Ramezani M., et al., 2014	Immunological and Antioxidant Effects of N-Acetylcysteine in Critically Ill Patients with Sepsis: A Prospective Randomized Clinical Trial	10.1186/2008-2231-22-57 / PMID: 25147787	DARU Journal of Pharmaceutical Sciences (2014)	Iran — Tehran University of Medical Sciences (Sina and Imam Khomeini Hospitals)	Prospective, randomized, controlled clinical trial	General ICU, tertiary university hospitals (Tehran, Iran)	Adult multiple trauma patients (>18 years) on mechanical ventilation (FiO₂ > 50%), with suspected infection and ≥2 SIRS criteria; APACHE II >15. Excluded: pregnancy, renal/liver failure, cardiac dysfunction, prior NAC use, or >24 h post-sepsis diagnosis.	N = 39 analyzed (NAC group = 21; Control = 18; 5 excluded: 3 deaths before endpoint, 2 protocol deviations)	Intravenous N-acetylcysteine (NAC) + standard sepsis care	3 g NAC in 250 mL 5% dextrose infused over 30 min every 6 h for 72 h (total = 12 g/day × 3 days)	Standard sepsis treatment alone (no NAC)	NAC n = 21; Control n = 18	Change in immunological (IgM, HβD2) and antioxidant (GSH) biomarkers over 5 days	Levels of immunoglobulin M (IgM), human beta-defensin 2 (HβD2), and glutathione (GSH) measured via ELISA at baseline, 24 h, 72 h, and 120 h	Continuous biochemical measures (mean ± SD; repeated measures)	IgM (p = 0.325, NS), GSH (p = 0.125, NS), HβD2 (p = 0.463, NS); GSH and HβD2 trended higher in NAC group (non-significant).	No statistically significant intergroup differences; mean serum GSH slightly higher in NAC vs control; mortality 40% (NAC) vs 22% (control), p = 0.209.	No significant improvement in clinical or biochemical outcomes (p > 0.05 for all). Non-significant trend toward higher GSH and HβD2 in NAC group.	No statistically significant effect on GSH, HβD2, SOFA, or mortality; slight increase in redox/immunologic markers without clinical benefit.	N/A – only NAC studied	Block randomization	Not explicitly reported (likely moderate risk)	Not specified; likely open-label (possible performance bias)	5 patients excluded (3 deaths before endpoint, 2 received incorrect dosage) – analyzed per-protocol	Low risk – pre-specified outcomes (IgM, GSH, HβD2) all reported	Moderate risk of bias (due to blinding, per-protocol analysis)	Ethics approval from TUMS; registered IRCT2014010716120N1; no serious adverse events; NAC well-tolerated.	Department of Clinical Pharmacy, Tehran University of Medical Sciences (Principal Investigator: Dr. Ali Najafi).
